# Supplementary material for: Phylogenetic Dependency Networks: Inferring Patterns of CTL Escape and Codon Covariation in HIV-1 Gag
Source: PLoS Comput Biol. 2008 Nov 21;4(11):e1000225. doi: 10.1371/journal.pcbi.1000225 (PMC2579584; doi:10.1371/journal.pcbi.1000225)
Supplement: Table S1 — List of associations with q<0.2. (0.29 MB XLS) [file pcbi.1000225.s001.xls]

## Sheet: notes
All associations with q<0.2 on the HOMER+Durban p17/p24 cohort.
Sequences are HXB2 aligned to the start of P17 Gag.
Columns:
TargetAttribute	The attribute (X) in the text
PredictorAttribute	The attribute (Y) in the text. The p values are with respect to this Attribute, conditioned on the ConditioningPredictorAttributes
ConditioningPredictorAttributes	The complete set of predictor Attributes for the alternative model is given by the union of the ConditioningPredictorAttributes and the PredictorAttribute. The null model uses the ConditioningPredictorAttributes. The order of the Attributes is the order in which they were added to the model.
LeafDistribution	Specifies the leaf distributions used for each predictor Attribute. The list is in the order of the ConditioningPredictorAttributes, with the PredictorAttribute being the last leaf distribution
TT-FF	Specifies the 2x2 contingency table values for the PredictorAttribute (first) and TargetAttribute (second)
Pvalue	The p value computed from the NoisyAdd model, using the ConditioningPredictorAttributes as the null model and the ConditioningPredictorAttributes+PredictorAttribute as the alternative model.
Qvalue	The q value computed as described in the text.

## Sheet: codon-codon associations
LeafDistribution	PredictorAttribute	TargetAttribute	ConditioningPredictorAttributes	TT	TF	FT	FF	PValue	qValue
Repulsion	228@I	248@T		66	44	13	999	5.50606e-36	5.89039e-31
Attraction	248@T	228@I		66	13	44	999	1.10514e-31	5.91139e-27
Escape	163@G	165@S		6	45	1077	13	2.10287e-30	7.49884e-26
Attraction	264@K	173@A		29	6	6	1099	2.11153e-29	4.93823e-25
Reversion	165@S	163@G		6	1077	45	13	2.30801e-29	4.93823e-25
Repulsion	173@A	264@K		29	6	6	1099	3.8114e-28	6.79572e-24
Escape	248@T	228@M		12	67	913	123	1.19929e-26	1.83286e-22
Reversion	173@A	264@R		6	29	1086	18	3.96568e-24	5.3031e-20
Attraction	163@G	165@N		42	9	13	1077	4.63097e-24	5.50468e-20
Repulsion	165@S	163@A		1059	23	13	45	3.30141e-23	3.53185e-19
Escape	301@Y	61@I		14	521	275	308	3.90985e-22	3.80251e-18
Escape	9@S	126@E		0	559	110	449	7.93677e-22	7.07563e-18
Escape	264@K	268@L		4	31	1022	72	2.41994e-20	1.99142e-16
Attraction	84@T	82@V		740	46	176	101	7.36542e-20	5.62823e-16
Repulsion	336@G	332@I		32	43	1	1065	1.25534e-19	8.95309e-16
Escape	250@M	252@G		99	986	40	13	1.40566e-19	9.39857e-16
Escape	264@K	173@S		1	35	459	626	1.75277e-19	1.10301e-15
Attraction	190@T	186@T		1084	29	7	22	2.68983e-18	1.59865e-14
Escape	228@I	248@A		36	73	558	440	2.96886e-18	1.67163e-14
Repulsion	84@V	82@I		95	178	43	748	3.46835e-18	1.85522e-14
Repulsion	301@Y	252@H		76	455	6	581	6.42808e-18	3.27465e-14
Reversion	340@G	319@E		136	434	507	34	8.23358e-18	4.00377e-14
Escape	190@T	186@S		18	1096	13	16	1.30403e-17	5.91617e-14
Repulsion	340@G	319@D		433	137	34	507	1.32724e-17	5.91617e-14
Attraction	340@A	339@P		531	0	483	94	1.39133e-17	5.9538e-14
Repulsion	11@G	7@I		225	471	206	191	1.93616e-17	7.96656e-14
Attraction	264@K	268@M		23	11	66	1026	5.76665e-17	2.28488e-13
Escape	186@S	190@T		18	13	1096	16	7.8111e-17	2.9844e-13
Reversion	11@G	7@V		471	225	190	207	9.28883e-17	3.42662e-13
Escape,Repulsion	339@P	336@A	332@I	1003	41	57	37	5.82763e-16	2.0425e-12
Attraction	7@I	34@L		288	139	94	554	5.91863e-16	2.0425e-12
Escape	228@I	219@H		34	76	890	92	8.36457e-16	2.79638e-12
Escape	9@S	90@A		1	561	103	470	8.81732e-16	2.85842e-12
Reversion	219@Q	218@V		97	58	919	21	1.06662e-15	3.35607e-12
Attraction	62@K	65@H		79	188	31	823	1.21332e-15	3.70859e-12
Attraction	332@I	336@G		32	1	43	1065	2.92401e-15	8.68918e-12
Escape	280@V	159@V		63	583	417	49	4.00822e-15	1.15892e-11
Escape	301@Y	90@K		2	548	160	423	4.11678e-15	1.15898e-11
Escape	332@I	336@A		1	32	1062	46	4.50832e-15	1.23667e-11
Attraction	228@I	219@Q		74	36	85	901	6.15925e-15	1.64729e-11
Attraction	280@V	159@I		581	65	49	417	6.91065e-15	1.80317e-11
Attraction,Attraction	339@Q	336@G	332@I	22	9	53	1056	1.23799e-14	3.15333e-11
Escape	186@T	190@I		0	1091	15	36	2.46893e-14	6.14246e-11
Repulsion,Attraction	34@L	7@I	11@G	288	94	139	554	3.1243e-14	7.59631e-11
Attraction,Attraction	91@G	12@K	91@N	118	10	531	455	3.49004e-14	8.29698e-11
Reversion,Escape	34@L	7@V	11@G	94	288	553	140	4.21581e-14	9.80452e-11
Repulsion	336@G	339@Q		22	53	9	1056	4.68703e-14	1.04995e-10
Escape,Escape	91@N	12@E	91@G	0	88	342	668	4.71094e-14	1.04995e-10
Repulsion	224@P	225@A		11	22	0	1108	5.05395e-14	1.08134e-10
Reversion	224@P	225@P		22	11	1108	0	5.05395e-14	1.08134e-10
Repulsion	219@Q	218@A		28	123	5	938	6.59329e-14	1.38304e-10
Attraction,Escape	30@M	28@Q	A03	25	412	173	509	8.24792e-14	1.69685e-10
Attraction	91@N	12@K		86	1	560	464	8.61014e-14	1.73795e-10
Escape	7@I	34@I		138	289	530	106	8.92176e-14	1.7675e-10
Repulsion	301@Y	326@S		126	411	4	583	1.99493e-13	3.81102e-10
Reversion	301@Y	326@A		411	126	583	4	1.99493e-13	3.81102e-10
Attraction	316@*	1@I		5	0	1	1138	2.47982e-13	4.65423e-10
Attraction	1@I	316@*		5	1	0	1138	2.7283e-13	5.0323e-10
Repulsion	224@P	223@N		12	21	13	1094	2.96578e-13	5.37762e-10
Attraction	223@N	224@P		12	13	21	1094	5.30722e-13	9.46276e-10
Reversion,Repulsion	124@K	91@K	12@K	8	7	210	299	5.85783e-13	1.02733e-09
Repulsion	93@K	15@E		10	29	1	1095	6.76402e-13	1.16712e-09
Escape	62@K	111@S		160	103	759	74	7.60712e-13	1.29176e-09
Escape	62@K	65@Q		186	81	812	42	1.02673e-12	1.71624e-09
Repulsion,Reversion	303@T	340@A	319@E	475	539	56	39	1.10165e-12	1.80367e-09
Escape,Reversion	12@K	20@R	A74	590	64	465	1	1.11275e-12	1.80367e-09
Escape,Escape	230@D	219@H	228@I	16	26	912	135	1.38634e-12	2.21033e-09
Reversion,Repulsion	303@T	340@G	319@E	532	484	38	57	1.40496e-12	2.21033e-09
Repulsion	72@S	62@E		77	455	11	554	1.43847e-12	2.23026e-09
Escape,Escape	219@Q	228@M	248@T	67	91	835	98	1.67228e-12	2.55573e-09
Repulsion	225@P	224@A		1102	28	0	11	1.76942e-12	2.66609e-09
Attraction	90@E	54@S		228	16	631	214	1.94955e-12	2.89671e-09
Escape	91@G	12@E		1	127	340	634	2.29854e-12	3.36846e-09
Escape	335@K	168@I		1	639	50	446	2.40185e-12	3.4723e-09
Escape	301@Y	9@K		0	555	76	506	3.17257e-12	4.52535e-09
Escape	28@Q	30@M		25	173	412	509	3.44692e-12	4.84061e-09
Reversion	186@T	177@D		3	1087	10	41	3.49917e-12	4.84061e-09
Attraction	30@M	94@V		409	24	520	137	3.52933e-12	4.84061e-09
Repulsion	54@S	90@E		228	631	16	214	3.88021e-12	5.25449e-09
Escape	1@I	316@W		1	5	1137	1	4.26039e-12	5.6972e-09
Escape	30@M	94@I		24	409	136	522	6.27617e-12	8.28919e-09
Escape	316@*	1@M		0	5	1135	4	6.65378e-12	8.68075e-09
Repulsion	12@K	91@N		86	560	1	464	6.93235e-12	8.93521e-09
Attraction	316@*	212@*		5	0	1	1138	1.03363e-11	1.3164e-08
Escape,Escape,Attraction	252@S	228@M	248@T,219@Q	345	44	557	147	1.15391e-11	1.45229e-08
Attraction	212@*	16@*		5	1	0	1133	1.37024e-11	1.70451e-08
Repulsion	9@S	30@R		244	282	70	506	2.13786e-11	2.62883e-08
Escape	242@N	248@G		18	130	398	576	2.6153e-11	3.17937e-08
Escape	9@S	28@C		0	562	49	527	3.40587e-11	4.09355e-08
Repulsion,Reversion,Repulsion	339@P	340@A	319@E,303@T	531	483	0	94	3.44382e-11	4.09355e-08
Escape	111@S	62@K		160	759	103	74	3.55845e-11	4.18333e-08
Escape	316@*	212@W		0	5	1137	2	3.92752e-11	4.56702e-08
Repulsion	62@E	55@G		29	52	15	984	4.25346e-11	4.87003e-08
Reversion,Repulsion,Reversion	339@P	340@G	319@E,303@T	476	540	93	1	4.27914e-11	4.87003e-08
Reversion	12@K	91@K		228	418	240	189	5.20941e-11	5.86635e-08
Repulsion	336@A	332@T		1021	39	37	41	5.27734e-11	5.88094e-08
Reversion,Escape	136@R	264@R	173@A	1	6	1088	42	6.43989e-11	7.10247e-08
Escape	339@P	303@A		0	1044	9	85	7.2139e-11	7.87492e-08
Repulsion	112@Q	20@K		45	505	0	579	9.0618e-11	9.79224e-08
Repulsion	248@A	256@V		283	319	17	497	9.58904e-11	1.02584e-07
Escape,Attraction,Escape	69@K	62@K	111@S,90@E	9	76	257	767	1.04667e-10	1.10864e-07
Escape	219@H	230@D		16	912	26	135	1.08369e-10	1.1366e-07
Escape	212@*	288@G		1	5	1137	1	1.20288e-10	1.23734e-07
Attraction	212@*	288@R		5	1	1	1137	1.20288e-10	1.23734e-07
Attraction	15@E	93@K		10	1	29	1095	1.26304e-10	1.28686e-07
Escape,Repulsion,Escape	332@V	336@A	332@I,339@P	0	7	1063	71	1.6562e-10	1.67152e-07
Escape	126@S	62@Q		3	438	114	546	1.68689e-10	1.68658e-07
Reversion	301@Y	67@A		117	353	567	18	1.91495e-10	1.89686e-07
Attraction,Reversion	225@P	224@P	223@N	22	1108	11	0	1.99028e-10	1.9534e-07
Repulsion	301@Y	127@P		31	511	0	575	2.5002e-10	2.43156e-07
Attraction	335@K	168@V		637	3	446	50	2.74677e-10	2.64729e-07
Repulsion	301@Y	67@S		347	122	15	570	2.83818e-10	2.71097e-07
Escape,Escape	228@I	248@G	242@N	2	111	411	586	2.88314e-10	2.72954e-07
Attraction	219@H	230@E		910	18	135	26	3.24609e-10	3.0462e-07
Attraction,Reversion	218@V	219@Q	228@I	97	919	58	21	3.55369e-10	3.30586e-07
Attraction,Escape	79@F	65@H	62@K	21	402	89	585	4.07983e-10	3.76259e-07
Escape	12@E	91@G		1	340	127	634	4.14312e-10	3.7883e-07
Escape,Attraction	67@S	28@K	A03	232	114	83	593	4.79017e-10	4.34282e-07
Escape	65@H	79@F		21	89	402	585	5.51669e-10	4.95946e-07
Reversion	215@L	260@E		524	388	142	52	5.72081e-10	5.1001e-07
Reversion	319@E	340@G		136	507	434	34	6.93576e-10	6.13213e-07
Repulsion,Attraction,Attraction	69@K	62@E	72@S,55@G	21	64	65	936	7.11033e-10	6.23494e-07
Attraction	9@S	11@G		552	7	185	390	7.67753e-10	6.67758e-07
Repulsion	215@L	260@D		387	525	52	142	8.34683e-10	7.20116e-07
Repulsion,Attraction	55@G	62@E	72@S	29	15	52	984	8.74445e-10	7.48385e-07
Attraction	65@H	79@Y		87	23	570	414	9.68283e-10	8.22118e-07
Attraction	123@A	124@D		5	3	2	548	1.06224e-09	8.94787e-07
Attraction,Escape	219@H	228@I	248@T	34	890	76	92	1.1252e-09	9.40418e-07
Attraction,Repulsion,Reversion	335@K	339@P	340@A,336@A	598	44	445	50	1.14356e-09	9.48358e-07
Attraction,Attraction,Escape,Reversion	20@R	12@K	91@N,91@G,A74	590	465	64	1	1.20797e-09	9.94066e-07
Repulsion	339@P	335@R		445	598	50	44	1.27584e-09	1.03401e-06
Reversion	339@P	335@K		598	445	44	50	1.27584e-09	1.03401e-06
Escape	357@G	362@I		33	677	33	357	1.34585e-09	1.08255e-06
Attraction	228@L	252@N		45	27	409	610	1.39986e-09	1.11759e-06
Escape	28@Q	95@K		70	115	365	530	1.5879e-09	1.25832e-06
Attraction	62@K	111@C		69	194	40	800	1.61818e-09	1.27289e-06
Repulsion,Escape	228@L	252@S	250@M	9	63	382	656	1.63658e-09	1.27796e-06
Escape,Repulsion	186@T	177@E	B81	1082	8	41	10	1.70505e-09	1.30763e-06
Escape,Escape,Attraction,Attraction,Attraction	252@G	228@M	248@T,219@Q,252@S,248@G	121	18	800	175	1.70735e-09	1.30763e-06
Repulsion	250@M	252@S		390	671	4	49	1.71123e-09	1.30763e-06
Attraction,Reversion,Repulsion	280@T	219@Q	228@I,218@V	80	322	76	603	1.73882e-09	1.31929e-06
Escape	212@*	16@W		1	5	1127	4	1.83702e-09	1.38398e-06
Attraction	16@*	269@R		4	1	0	1133	1.93732e-09	1.43927e-06
Escape	16@*	269@G		1	4	1133	0	1.93732e-09	1.43927e-06
Repulsion	219@Q	218@P		19	136	0	943	2.04389e-09	1.50796e-06
Attraction,Repulsion	336@A	339@P	340@A	1003	57	41	37	2.17456e-09	1.59339e-06
Escape,Reversion	203@E	268@L	264@K	448	93	577	10	2.41079e-09	1.75446e-06
Attraction,Attraction,Escape,Reversion,Attraction	15@Q	12@K	91@N,91@G,A74,20@R	31	0	623	467	2.72872e-09	1.97242e-06
Attraction	357@G	362@V		676	34	357	33	3.10734e-09	2.23102e-06
Repulsion	11@G	18@K		651	64	258	139	3.1929e-09	2.27717e-06
Escape	9@S	11@E		6	554	372	203	3.46539e-09	2.45515e-06
Escape	1@I	232@R		2	4	1134	4	3.80206e-09	2.67595e-06
Escape,Attraction	79@F	65@Q	62@K	397	26	577	97	4.21644e-09	2.93309e-06
Escape	336@A	332@V		0	1063	7	71	4.22224e-09	2.93309e-06
Escape,Escape,Attraction,Attraction	248@G	228@M	248@T,219@Q,252@S	401	7	511	185	4.57765e-09	3.15947e-06
Attraction	15@R	93@D		210	235	208	418	4.6797e-09	3.2092e-06
Escape,Attraction	90@E	62@K	111@S	147	96	117	761	5.11775e-09	3.48724e-06
Reversion	248@A	256@I		315	286	489	24	5.77048e-09	3.90713e-06
Reversion	82@L	60@I		4	4	1115	15	5.82281e-09	3.91776e-06
Reversion	163@G	247@I		40	11	1065	22	6.69597e-09	4.47709e-06
Reversion	11@G	18@R		59	656	135	262	7.45788e-09	4.95555e-06
Escape	113@Q	126@N		4	559	42	495	7.57879e-09	5.00481e-06
Attraction	124@D	123@A		5	2	3	548	8.19927e-09	5.38134e-06
Repulsion	82@L	60@L		4	4	13	1117	9.2227e-09	6.01612e-06
Escape,Escape	93@D	94@I	30@M	26	394	130	517	9.2955e-09	6.02686e-06
Escape	55@G	62@G		2	44	344	670	1.00289e-08	6.46319e-06
Escape	252@S	228@L		9	382	63	656	1.1283e-08	7.2279e-06
Repulsion	159@V	280@T		384	87	36	594	1.15172e-08	7.33398e-06
Attraction,Repulsion	203@E	268@M	264@K	80	458	9	578	1.2902e-08	8.16113e-06
Repulsion	319@E	340@A		499	142	32	436	1.29687e-08	8.16113e-06
Repulsion	224@A	223@V		349	694	0	39	1.37536e-08	8.60442e-06
Escape,Escape,Attraction	256@V	228@L	252@S,252@G	52	249	20	815	1.54887e-08	9.63362e-06
Repulsion	121@D	122@K		49	424	3	124	1.62667e-08	1.00021e-05
Repulsion	163@G	247@V		11	40	19	1069	1.62681e-08	1.00021e-05
Escape	112@Q	119@A		405	140	526	30	1.65722e-08	1.01308e-05
Repulsion,Attraction	168@I	163@A	165@S	51	0	1020	68	1.70369e-08	1.03557e-05
Reversion	301@Y	280@V		72	470	580	7	1.76051e-08	1.06406e-05
Repulsion,Escape	223@N	224@A	225@P	13	12	1088	27	2.04917e-08	1.23157e-05
Reversion	39@R	35@I		44	1060	18	7	2.09546e-08	1.25236e-05
Attraction,Repulsion	7@I	11@G	9@S	225	206	471	191	2.19566e-08	1.30496e-05
Repulsion	82@V	84@T		740	176	46	101	2.59523e-08	1.53391e-05
Attraction,Attraction	93@D	94@V	30@M	392	27	517	130	2.97017e-08	1.74587e-05
Escape,Attraction	30@M	28@H	C17	263	174	47	656	3.07087e-08	1.7952e-05
Reversion	288@G	229@K		1	1137	4	2	3.20483e-08	1.86333e-05
Repulsion	138@I	280@A		9	64	3	1029	3.28361e-08	1.89881e-05
Attraction,Attraction,Attraction	332@V	336@G	332@I,339@Q	6	1	69	1065	3.32958e-08	1.91505e-05
Attraction,Attraction,Attraction,Repulsion	310@T	336@G	332@I,339@Q,332@V	75	531	0	508	3.51051e-08	2.00831e-05
Attraction,Reversion,Repulsion,Reversion	223@I	219@Q	228@I,218@V,280@T	59	572	95	336	3.5788e-08	2.03649e-05
Escape,Attraction	303@V	312@D	B44	56	8	470	580	4.12428e-08	2.33447e-05
Attraction,Attraction	95@Q	93@K	15@E	18	31	20	1070	4.59745e-08	2.58861e-05
Attraction,Escape	303@V	312@E	B44	8	56	578	471	4.63312e-08	2.59503e-05
Repulsion,Attraction,Reversion	310@T	163@A	165@S,168@I	541	68	507	0	4.67793e-08	2.60648e-05
Escape	90@E	54@A		15	229	164	685	5.04337e-08	2.79555e-05
Escape	12@E	15@A		0	344	89	678	5.61412e-08	3.09587e-05
Attraction	90@E	58@R		56	188	495	363	5.69209e-08	3.12277e-05
Reversion	124@N	121@A		5	438	14	73	5.82327e-08	3.17844e-05
Reversion	113@Q	342@T		405	163	540	8	6.02383e-08	3.27122e-05
Repulsion	264@K	268@I		7	28	4	1098	6.38657e-08	3.45069e-05
Repulsion,Attraction	228@L	252@H	301@Y	12	60	69	973	6.54906e-08	3.5207e-05
Attraction,Escape,Escape	248@G	228@I	248@T,219@H	2	411	111	586	6.63051e-08	3.54666e-05
Reversion,Escape,Repulsion	268@L	264@R	173@A,136@R	1013	12	68	35	6.73213e-08	3.5831e-05
Attraction	186@S	190@A		6	25	6	1107	6.85181e-08	3.62875e-05
Escape	264@R	136@R		1	1088	6	42	7.52005e-08	3.96303e-05
Repulsion	230@E	223@I		633	400	6	38	7.88258e-08	4.13372e-05
Reversion,Attraction,Reversion	250@M	260@E	215@L,B35	645	433	45	8	8.17505e-08	4.26618e-05
Repulsion,Escape,Repulsion	250@M	260@D	215@L,B35	432	646	8	45	9.46295e-08	4.9143e-05
Escape	9@S	15@T		2	558	133	443	9.51317e-08	4.91652e-05
Repulsion	288@G	229@R		1136	2	2	4	1.00411e-07	5.15778e-05
Escape	112@K	109@K		2	556	43	524	1.00764e-07	5.15778e-05
Repulsion	127@K	128@I		41	516	0	554	1.02855e-07	5.23973e-05
Attraction,Repulsion	186@T	159@I	280@V	604	469	32	19	1.04262e-07	5.28622e-05
Repulsion,Attraction	267@V	264@K	173@A	4	17	31	1088	1.08269e-07	5.46349e-05
Repulsion,Reversion	230@E	223@V	224@A	313	719	33	11	1.10596e-07	5.55472e-05
Reversion	12@E	10@G		315	27	763	4	1.17494e-07	5.8736e-05
Reversion	82@V	84@V		173	744	100	47	1.25933e-07	6.2662e-05
Repulsion,Escape,Repulsion,Reversion	136@Q	260@D	215@L,B35,250@M	428	692	9	0	1.32141e-07	6.54465e-05
Reversion,Attraction,Reversion,Repulsion	136@Q	260@E	215@L,B35,250@M	691	429	0	9	1.33104e-07	6.56194e-05
Escape	62@E	55@E		42	38	874	113	1.41845e-07	6.9608e-05
Attraction	35@V	39@R		1058	4	47	22	1.56442e-07	7.64208e-05
Escape,Attraction,Escape,Repulsion	61@I	62@K	111@S,90@E,69@K	156	130	110	709	1.63415e-07	7.93378e-05
Attraction	122@K	121@D		49	3	424	124	1.63897e-07	7.93378e-05
Attraction,Escape,Reversion	211@E	146@P	B57,C06	203	870	30	11	1.78443e-07	8.57545e-05
Escape	316@*	155@W		2	3	1137	1	1.78755e-07	8.57545e-05
Repulsion	280@T	148@A		18	406	0	688	1.83777e-07	8.77698e-05
Repulsion	113@Q	342@S		159	409	8	540	2.24068e-07	0.000106537
Escape,Attraction,Attraction,Repulsion	76@K	72@S	12@K,62@E,301@Y	330	318	199	248	2.34943e-07	0.000111173
Attraction	121@A	122@A		12	17	44	531	2.35897e-07	0.000111173
Repulsion	61@M	62@N		30	221	10	851	2.3882e-07	0.000112057
Repulsion,Attraction,Reversion	46@V	75@I	76@K,123@N	7	464	43	571	2.46064e-07	0.000114951
Escape,Attraction,Attraction	242@N	248@A	228@I,256@V	107	39	494	477	2.52067e-07	0.000116857
Attraction	28@Q	95@R		111	74	473	422	2.52327e-07	0.000116857
Repulsion,Escape	67@A	82@I	84@V	37	641	96	232	2.68376e-07	0.000123754
Escape,Attraction	62@E	69@K	67@S	21	65	64	936	2.75139e-07	0.000126328
Escape,Escape,Escape	218@A	219@H	228@I,230@D	5	28	925	132	2.79836e-07	0.000127935
Escape,Escape	168@I	165@S	163@G	42	9	1038	49	2.82862e-07	0.000128769
Attraction	20@S	28@R		9	2	108	1000	2.90933e-07	0.000131881
Attraction	136@R	264@G		4	3	3	1129	2.96528e-07	0.00013385
Reversion,Reversion	247@I	256@I	248@A	790	309	30	3	3.11041e-07	0.000139812
Attraction,Attraction	168@I	165@N	163@G	9	42	46	1041	3.23895e-07	0.00014498
Attraction,Attraction,Escape	60@L	82@V	84@T,67@A	7	10	918	138	3.38701e-07	0.000150976
Repulsion	301@Y	102@E		119	402	0	584	3.70154e-07	0.000164312
Repulsion	28@R	31@I		21	95	40	962	3.71765e-07	0.000164345
Attraction	28@K	30@Q		32	318	26	706	3.83503e-07	0.000168836
Repulsion	12@E	10@A		22	319	1	766	3.90152e-07	0.000171059
Escape,Reversion	186@T	159@V	280@V	468	605	18	33	4.15949e-07	0.000181625
Escape,Escape,Escape,Escape	218@P	219@H	228@I,230@D,218@A	0	19	930	145	4.33786e-07	0.000188644
Attraction	224@P	223@H		5	28	2	1106	4.39261e-07	0.000190252
Attraction,Escape,Escape	177@D	186@T	190@T,B81	3	10	1087	41	4.44133e-07	0.000191586
Repulsion,Repulsion	247@I	256@V	248@A	299	804	3	30	4.49019e-07	0.000192916
Escape,Escape,Escape,Repulsion	72@S	12@E	91@G,91@N,15@Q	338	206	5	557	4.53866e-07	0.000194218
Attraction,Escape,Reversion,Attraction,Attraction	242@N	146@P	B57,C06,211@E,C08	70	73	165	805	4.6007e-07	0.000196089
Attraction,Attraction	67@A	82@V	84@T	636	42	229	100	4.87735e-07	0.000207055
Attraction	1@I	232@K		3	3	2	1136	4.98198e-07	0.000210661
Reversion,Escape	62@E	69@Q	12@K	59	26	903	89	5.11407e-07	0.000215395
Reversion,Reversion	256@I	247@I	163@G	790	30	309	3	5.58955e-07	0.000234498
Escape,Escape	252@G	228@L	252@S	1	138	71	924	5.77164e-07	0.0002404
Attraction,Escape	94@I	93@D	15@R	26	130	394	517	5.77518e-07	0.0002404
Escape,Escape,Reversion,Reversion,Attraction,Reversion,Escape	159@I	242@T	B57,B58,250@M,182@Q,C06,B57	512	124	449	36	6.28998e-07	0.000260815
Attraction	93@K	95@Q		18	20	31	1070	6.43862e-07	0.000265947
Repulsion	39@R	35@V		1058	47	4	22	6.6578e-07	0.000273943
Escape	146@A	176@A		4	816	11	282	7.47515e-07	0.000306395
Attraction	125@C	124@S		8	0	29	502	7.61274e-07	0.000308718
Attraction	275@K	273@V		6	0	4	1133	7.6357e-07	0.000308718
Escape	275@K	273@I		0	6	1133	4	7.6357e-07	0.000308718
Escape,Attraction	256@V	248@A	228@I	283	17	319	497	7.64724e-07	0.000308718
Escape,Repulsion	256@I	182@Q	B81	794	31	269	43	7.73191e-07	0.000310962
Escape,Escape,Escape	15@Q	12@E	91@G,91@N	0	31	343	735	8.70322e-07	0.000348715
Escape	264@G	136@Q		3	4	1127	5	9.87729e-07	0.000394281
Repulsion	340@G	339@S		27	543	0	541	1.00334e-06	0.000399025
Escape,Attraction,Escape	309@S	312@D	B44,303@V	0	28	526	560	1.23607e-06	0.000489756
Attraction,Reversion,Repulsion	147@L	146@S	339@Q,256@I	17	257	8	838	1.24715e-06	0.000492325
Repulsion	256@V	215@I		22	280	7	830	1.39287e-06	0.000547829
Reversion	146@P	211@E		203	30	870	11	1.39872e-06	0.000548114
Escape,Attraction	94@I	93@E	B40	115	39	434	478	1.4073e-06	0.000549463
Escape	303@I	285@I		5	3	1132	2	1.47043e-06	0.000572023
Attraction,Repulsion,Reversion,Attraction	113@K	339@P	340@A,336@A,335@K	495	2	515	87	1.58811e-06	0.000615564
Repulsion	11@E	4@S		20	358	1	757	1.63681e-06	0.000632153
Reversion,Attraction	12@E	84@V	82@V	169	167	123	637	1.65147e-06	0.000635519
Escape	123@G	122@G		0	498	6	56	1.66534e-06	0.000638558
Repulsion	112@K	109@N		545	9	501	66	1.69915e-06	0.000649198
Escape	312@D	309@S		0	526	28	560	1.71577e-06	0.000653213
Escape,Attraction,Escape,Escape	203@E	69@K	67@S,62@E,62@K	9	528	76	511	1.7665e-06	0.000670141
Reversion	285@I	303@I		5	1132	3	2	1.78756e-06	0.000675737
Reversion,Repulsion	72@T	35@I	39@R	58	504	4	562	1.81251e-06	0.000682756
Reversion,Escape	127@Q	26@K	B15	386	43	608	27	1.85687e-06	0.000696474
Escape,Attraction,Attraction	46@V	65@Q	62@K,79@F	468	5	500	118	1.8651e-06	0.000696474
Reversion,Repulsion,Reversion	10@G	91@K	12@K,124@K	442	613	29	2	1.86846e-06	0.000696474
Attraction,Escape	219@Q	252@N	228@L	39	115	398	513	1.87581e-06	0.000696786
Escape,Escape	62@N	61@I	301@Y	4	36	285	794	2.00022e-06	0.000740428
Repulsion,Reversion,Repulsion,Attraction	342@S	340@A	319@E,303@T,339@P	51	118	476	459	2.04277e-06	0.000753572
Attraction	301@Y	31@L		552	1	512	71	2.10888e-06	0.000775284
Reversion	34@L	30@K		35	349	227	456	2.24932e-06	0.000824083
Repulsion,Attraction,Repulsion	12@K	20@K	112@Q,A74	45	609	0	468	2.26859e-06	0.000828306
Attraction	260@D	215@L		387	52	525	142	2.28526e-06	0.000831556
Repulsion,Repulsion	12@K	15@Q	91@R	31	623	0	467	2.3492e-06	0.000850179
Escape,Repulsion,Repulsion	146@A	168@I	335@K,260@D	48	772	3	290	2.35234e-06	0.000850179
Escape,Reversion,Escape,Reversion	215@L	268@L	264@K,203@E,B27	813	96	189	5	2.47126e-06	0.000890152
Attraction,Repulsion,Reversion	273@I	268@M	264@K,203@E	80	1036	9	1	2.48693e-06	0.000892793
Escape,Attraction,Escape,Repulsion,Attraction	65@H	62@K	111@S,90@E,69@K,61@I	79	31	188	823	2.53561e-06	0.000905164
Repulsion	67@S	280@I		10	339	0	685	2.53832e-06	0.000905164
Attraction	177@D	186@A		3	10	1	1129	2.56521e-06	0.000911717
Escape	252@G	250@M		99	40	986	13	2.60537e-06	0.000919878
Attraction	252@G	250@I		40	99	13	986	2.60537e-06	0.000919878
Repulsion,Attraction	76@R	18@K	11@G	385	42	487	161	2.73747e-06	0.000963336
Attraction,Attraction	124@A	123@A	124@D	3	8	5	551	2.83899e-06	0.000995788
Reversion,Escape	11@E	4@R	111@I	358	20	756	2	2.86182e-06	0.00100052
Attraction,Escape,Repulsion,Escape,Reversion	76@K	72@T	12@K,62@E,65@Q,301@Y	318	330	247	200	2.91405e-06	0.00101546
Attraction	191@I	163@N		5	8	7	1124	3.08533e-06	0.00107165
Escape	90@E	58@K		183	61	342	520	3.12678e-06	0.00108253
Repulsion,Escape	12@K	78@V	34@L	0	653	12	454	3.28369e-06	0.00113319
Escape	273@I	275@K		0	1133	6	4	3.3872e-06	0.00116515
Reversion	111@I	4@R		28	9	1077	12	3.43449e-06	0.00117763
Repulsion	163@N	191@I		5	7	8	1124	3.61449e-06	0.0012354
Repulsion	280@T	138@M		47	369	8	676	3.73777e-06	0.00127346
Attraction	138@S	182@H		5	1	8	1125	4.03883e-06	0.00137166
Repulsion,Repulsion	256@I	247@V	163@G	27	794	3	309	4.07765e-06	0.00138046
Repulsion	340@A	303@V		46	486	20	559	4.20513e-06	0.00141913
Escape,Repulsion	256@I	173@S	264@K	448	359	13	298	4.22275e-06	0.0014206
Attraction	280@T	323@V		425	0	648	37	4.24791e-06	0.00142188
Attraction,Attraction,Escape	61@M	58@R	90@E,15@K	29	221	510	324	4.25315e-06	0.00142188
Escape	67@S	69@K		4	352	81	604	4.59698e-06	0.00153204
Attraction	301@Y	43@R		550	0	557	28	4.65359e-06	0.00154609
Attraction	339@Q	146@S		7	24	17	1083	4.67784e-06	0.00154934
Attraction	118@Q	119@Q		3	2	10	1098	4.8682e-06	0.00160741
Reversion,Reversion	159@V	280@V	301@Y	63	417	583	49	4.97479e-06	0.00163755
Attraction,Escape	362@I	357@G	B07	33	33	677	357	5.10304e-06	0.0016716
Escape,Escape,Reversion	250@M	242@T	B57,B58	923	162	51	2	5.10949e-06	0.0016716
Repulsion	126@V	127@S		6	6	3	1104	5.26852e-06	0.00171837
Attraction,Escape,Attraction	228@I	252@N	228@L,219@Q	49	61	400	573	5.51054e-06	0.00178681
Repulsion	28@R	20@S		9	108	2	1000	5.51176e-06	0.00178681
Reversion,Escape	76@R	18@R	11@G	40	387	154	494	5.58385e-06	0.00180471
Attraction,Escape,Attraction	95@R	28@Q	A03,30@M	111	473	74	422	5.68197e-06	0.0018309
Attraction	60@L	82@L		4	13	4	1117	5.87007e-06	0.00188583
Attraction,Escape	256@V	173@A	264@K	0	302	34	803	5.88813e-06	0.00188596
Attraction,Reversion	34@L	78@L	12@K	375	12	721	2	6.13327e-06	0.00195524
Attraction	75@I	76@K		45	6	593	440	6.15048e-06	0.00195524
Repulsion,Escape,Reversion,Reversion,Escape,Reversion	256@I	252@S	250@M,228@L,148@S,215@L,256@V	242	560	150	160	6.15924e-06	0.00195524
Repulsion	146@P	211@D		28	205	10	871	6.20184e-06	0.00196294
Escape,Escape	76@R	176@A	146@A	0	439	15	643	6.30521e-06	0.00198545
Attraction	309@S	339@T		7	21	15	1097	6.3101e-06	0.00198545
Repulsion,Reversion	72@T	35@V	39@R	499	63	562	6	6.52155e-06	0.00204448
Attraction	127@S	126@V		6	3	6	1104	6.53592e-06	0.00204448
Escape,Attraction,Attraction,Escape,Escape	12@Q	28@K	A03,67@S,30@R,A30	8	50	354	681	6.59015e-06	0.00205543
Reversion,Reversion	331@K	335@K	339@P	601	490	30	6	6.66713e-06	0.00206739
Repulsion,Repulsion	331@K	335@R	339@P	490	601	6	30	6.66713e-06	0.00206739
Reversion,Attraction	75@F	67@A	301@Y	12	0	671	371	6.69423e-06	0.00206979
Attraction	84@V	81@A		17	272	9	814	6.73094e-06	0.00207139
Escape	9@S	43@K		0	561	26	550	6.73813e-06	0.00207139
Reversion	112@K	113@Q		24	529	549	17	6.77798e-06	0.00207734
Escape	55@E	12@D		3	927	12	146	6.79631e-06	0.00207734
Escape,Attraction,Escape,Repulsion	211@E	146@A	B57,C06,C08	811	261	11	30	6.86081e-06	0.00209108
Attraction,Reversion	256@I	146@S	339@Q	7	811	18	293	7.28717e-06	0.00221472
Attraction	119@Q	118@Q		3	10	2	1098	7.31085e-06	0.00221562
Attraction,Reversion,Repulsion,Reversion,Attraction,Reversion,Escape	228@M	219@Q	228@I,218@V,280@T,223@I,230@D,252@N	67	835	91	98	7.52885e-06	0.00227524
Repulsion	120@S	121@S		4	1	2	1114	7.7666e-06	0.00234048
Escape	121@A	124@N		5	14	438	73	7.81972e-06	0.00234372
Attraction	12@K	78@L		653	0	452	14	7.83756e-06	0.00234372
Attraction	286@R	309@A		729	0	357	31	7.84308e-06	0.00234372
Escape	120@A	121@T		0	1031	4	81	8.01833e-06	0.00238942
Escape,Repulsion	260@D	168@I	335@K	47	392	3	688	8.255e-06	0.00245311
Reversion,Reversion,Attraction	223@N	256@I	248@A,247@I	23	3	801	309	8.42048e-06	0.00249535
Repulsion,Reversion	83@A	339@Q	336@G	27	1101	3	4	8.77489e-06	0.0025932
Repulsion	126@G	127@N		11	405	0	690	8.86528e-06	0.00261269
Attraction,Attraction	223@I	230@E	219@H	633	6	400	38	9.19655e-06	0.00270288
Escape	163@N	191@V		7	5	1122	10	9.33316e-06	0.00273551
Repulsion,Escape	75@F	67@S	301@Y	0	12	362	679	9.47128e-06	0.00276841
Reversion	4@R	111@I		28	1077	9	12	9.58485e-06	0.00279397
Escape,Attraction	362@I	357@S	B07	32	34	354	681	9.70862e-06	0.00281985
Escape,Escape,Repulsion	59@Q	61@I	301@Y,62@N	287	801	0	13	9.72636e-06	0.00281985
Escape,Reversion	11@G	34@I	7@I	437	261	255	141	9.90989e-06	0.0028653
Attraction,Attraction,Repulsion	250@M	242@N	B57,B58	148	939	2	51	1.01045e-05	0.00290925
Escape,Escape,Attraction	138@A	252@G	250@M,228@L	10	15	128	983	1.01367e-05	0.00290925
Escape,Attraction,Attraction,Attraction	177@D	186@S	190@T,B81,182@S	7	6	24	1106	1.01435e-05	0.00290925
Attraction,Escape,Reversion,Attraction,Attraction,Attraction	149@A	146@P	B57,C06,211@E,C08,242@N	4	0	231	881	1.02599e-05	0.00293478
Attraction	252@G	255@A		11	127	8	988	1.04084e-05	0.00296932
Attraction,Attraction	15@K	58@R	90@E	128	207	407	343	1.06195e-05	0.00302146
Reversion,Reversion,Repulsion,Escape	312@E	280@V	301@Y,159@V,211@E	200	379	449	74	1.08947e-05	0.00309156
Escape	75@I	76@R		6	45	432	605	1.11089e-05	0.00314398
Escape	121@A	122@T		8	21	446	123	1.12363e-05	0.00317167
Attraction	273@I	275@R		1132	1	4	6	1.12988e-05	0.00318091
Repulsion	186@T	173@T		588	483	31	20	1.23819e-05	0.00347667
Escape,Escape	91@K	90@A	9@S	26	449	80	536	1.2452e-05	0.0034872
Attraction	72@T	176@S		565	1	551	17	1.26954e-05	0.00354609
Escape,Escape,Escape,Escape,Escape	228@V	219@H	228@I,230@D,218@A,218@P	2	6	928	163	1.30955e-05	0.00364831
Attraction	121@S	120@S		4	2	1	1114	1.38494e-05	0.00384833
Attraction	280@A	138@I		9	3	64	1029	1.41792e-05	0.00392976
Attraction,Escape,Reversion,Attraction,Attraction,Attraction,Attraction	176@A	146@P	B57,C06,211@E,C08,242@N,149@A	11	5	223	874	1.44499e-05	0.00399444
Reversion,Repulsion,Reversion,Escape	342@S	340@G	319@E,303@T,339@P	115	54	454	482	1.44899e-05	0.00399485
Escape,Escape	125@C	124@N	121@A	0	8	442	75	1.4526e-05	0.00399485
Escape,Escape	91@N	15@A	12@E	0	91	89	944	1.47226e-05	0.00403854
Attraction,Reversion,Repulsion,Reversion,Attraction	230@D	219@Q	228@I,218@V,280@T,223@I	22	21	131	919	1.47786e-05	0.00404351
Escape,Attraction,Attraction	30@R	28@K	A03,67@S	162	141	183	590	1.51223e-05	0.00412045
Repulsion,Reversion,Escape,Repulsion	312@E	280@T	159@V,46@L,138@I	344	226	63	456	1.51368e-05	0.00412045
Attraction,Escape	62@N	54@S	90@E	19	21	844	212	1.51906e-05	0.00412458
Attraction,Escape,Escape,Repulsion	142@M	186@T	190@T,B81,177@D	1074	46	12	5	1.57611e-05	0.00426867
Repulsion,Reversion	64@L	62@N	61@M	32	1082	8	14	1.6056e-05	0.00433756
Attraction,Repulsion	248@A	95@R	28@Q	461	136	128	354	1.62087e-05	0.00436779
Escape	335@K	182@T		0	644	13	483	1.62696e-05	0.00437317
Attraction,Attraction	31@I	28@R	20@S	21	40	95	962	1.63307e-05	0.0043786
Repulsion,Attraction	11@E	248@T	228@I	39	339	38	715	1.67243e-05	0.00447291
Escape	124@D	128@V		4	4	520	16	1.686e-05	0.00449795
Repulsion,Repulsion	312@D	303@V	340@A	56	470	8	580	1.72588e-05	0.00459029
Escape,Escape,Escape	256@V	248@G	242@N,228@I	7	293	407	414	1.72919e-05	0.00459029
Attraction,Repulsion,Reversion,Attraction,Escape	303@A	339@P	340@A,336@A,335@K,113@K	0	9	1044	85	1.78951e-05	0.00473866
Attraction,Repulsion,Repulsion	113@Q	339@T	309@S,335@K	22	548	0	554	1.81675e-05	0.00479891
Escape,Escape,Escape,Escape,Escape,Repulsion,Reversion	310@S	219@H	228@I,230@D,218@A,218@P,228@V,223@I	376	92	534	75	1.85706e-05	0.00486244
Repulsion,Reversion	112@Q	26@R	B15	17	533	41	497	1.85751e-05	0.00486244
Reversion	301@Y	203@D		10	544	578	10	1.85898e-05	0.00486244
Repulsion	301@Y	203@E		544	10	10	578	1.85898e-05	0.00486244
Repulsion	115@T	242@S		14	487	0	609	1.88957e-05	0.0049304
Repulsion,Escape,Attraction	223@V	224@A	225@P,223@N	349	0	694	39	1.8985e-05	0.00494165
Attraction	62@N	61@M		30	10	221	851	1.90489e-05	0.00494624
Escape,Repulsion,Repulsion,Attraction,Escape,Repulsion,Attraction	165@N	168@I	335@K,260@D,146@A,182@E,252@G,163@A	9	46	42	1041	1.9878e-05	0.00514903
Escape,Reversion,Escape,Reversion,Repulsion	273@I	268@L	264@K,203@E,B27,215@L	1025	94	1	9	2.04045e-05	0.00526836
Escape,Repulsion,Escape,Reversion	310@T	336@A	332@I,339@P,332@V	529	77	507	1	2.04372e-05	0.00526836
Attraction,Escape,Reversion,Attraction,Escape	46@L	303@T	286@R,339@T,323@V,340@G	519	84	517	13	2.09649e-05	0.00538697
Escape,Attraction,Escape,Repulsion,Attraction,Escape	112@K	62@K	111@S,90@E,69@K,61@I,65@H	1	547	262	302	2.0998e-05	0.00538697
Reversion	12@K	69@Q		550	97	427	18	2.11052e-05	0.00539332
Escape,Attraction	90@A	15@K	93@K	61	43	282	728	2.11236e-05	0.00539332
Attraction	30@M	119@E		35	389	10	681	2.14695e-05	0.00546858
Escape	252@G	255@P		125	13	982	10	2.16273e-05	0.0054957
Escape	186@T	147@V		1	1088	4	47	2.18326e-05	0.00553473
Escape,Attraction,Escape	62@K	69@K	67@S,62@E	9	257	76	767	2.20466e-05	0.00556496
Attraction,Escape,Reversion,Attraction	146@P	168@V	335@K,182@E,260@D	234	1	827	52	2.20559e-05	0.00556496
Attraction,Repulsion	11@G	34@L	7@I	249	462	138	258	2.29095e-05	0.00576674
Escape,Repulsion	260@D	136@R	264@R	7	430	0	692	2.29702e-05	0.00576843
Attraction,Repulsion,Reversion,Escape,Repulsion,Attraction,Escape	146@P	268@M	264@K,203@E,273@I,B08,215@L,B27	7	224	81	788	2.38203e-05	0.00596789
Attraction,Repulsion,Attraction	301@Y	11@G	9@S,7@I	546	6	191	391	2.38891e-05	0.00597117
Escape,Escape,Escape,Repulsion,Attraction	11@K	12@E	91@G,91@N,15@Q,72@S	3	9	341	758	2.40591e-05	0.00599964
Escape	93@K	15@K		2	37	341	733	2.45633e-05	0.0060976
Repulsion,Escape	15@A	91@N	12@K	0	89	91	944	2.4566e-05	0.0060976
Attraction,Repulsion,Escape	12@E	34@L	7@I,11@G	37	299	351	398	2.47349e-05	0.00612533
Attraction,Attraction,Repulsion,Repulsion	182@Q	242@N	B57,B58,250@M	148	917	2	72	2.48451e-05	0.0061384
Reversion,Escape,Escape,Attraction	62@K	69@Q	12@K,62@E,61@I	246	19	736	97	2.49419e-05	0.00614813
Escape,Escape	65@H	62@Q	126@S	4	107	113	909	2.54109e-05	0.00624932
Escape,Repulsion	115@A	362@I	357@G	61	473	4	540	2.54827e-05	0.00625261
Attraction	62@K	252@A		14	253	3	857	2.55929e-05	0.00626528
Repulsion,Reversion	46@L	280@T	159@V	18	585	407	99	2.62283e-05	0.00640616
Attraction	62@Q	119@M		7	108	7	1001	2.65123e-05	0.00646078
Attraction,Escape	182@E	168@V	335@K	2	5	1085	48	2.68432e-05	0.00652656
Repulsion	76@K	75@I		45	593	6	440	2.71123e-05	0.00657704
Escape,Escape,Attraction,Escape	248@G	252@G	250@M,228@L,138@A	0	413	139	568	2.78488e-05	0.00674043
Repulsion	62@N	64@I		7	33	10	1089	2.82121e-05	0.00681294
Attraction,Escape,Repulsion,Escape,Reversion,Repulsion	46@L	72@T	12@K,62@E,65@Q,301@Y,76@K	555	46	9	520	2.95332e-05	0.00711591
Reversion,Reversion,Repulsion,Escape,Reversion	332@T	280@V	301@Y,159@V,211@E,312@E	576	470	74	6	3.04399e-05	0.0073179
Attraction,Escape	124@D	121@D	122@K	1	6	421	101	3.06724e-05	0.00735726
Escape,Escape	228@L	252@G	250@M	1	71	138	924	3.12857e-05	0.00748757
Attraction,Escape,Attraction,Repulsion	173@S	252@N	228@L,219@Q,228@I	302	127	147	505	3.14023e-05	0.0074987
Attraction,Escape,Reversion,Attraction,Attraction,Attraction,Attraction,Repulsion	168@V	146@P	B57,C06,211@E,C08,242@N,149@A,176@A	234	827	1	52	3.16015e-05	0.00752945
Attraction	30@M	114@E		9	415	0	693	3.17912e-05	0.00755783
Repulsion	319@E	117@P		19	645	0	459	3.19606e-05	0.00758126
Attraction	182@H	143@I		5	8	6	1118	3.27058e-05	0.00774085
Repulsion	124@S	125@C		8	29	0	502	3.29125e-05	0.00777257
Attraction,Attraction	20@K	28@S	B42	6	39	11	1083	3.30889e-05	0.00779704
Reversion	62@N	64@L		32	8	1082	14	3.32056e-05	0.00780733
Escape,Escape	223@I	230@D	219@H	6	633	36	402	3.32928e-05	0.00781068
Escape,Escape,Attraction	75@F	62@Q	126@S,65@H	6	6	111	1012	3.40066e-05	0.00796068
Escape,Escape	28@H	182@T	335@K	0	310	13	817	3.42721e-05	0.00800531
Repulsion,Repulsion	72@T	31@I	28@R	59	502	2	571	3.49933e-05	0.00815596
Escape	75@I	46@V		7	43	464	571	3.54952e-05	0.00825495
Repulsion	91@R	15@Q		23	310	7	747	3.6432e-05	0.00845445
Attraction	173@A	315@T		3	30	1	1103	3.69061e-05	0.00854592
Attraction,Repulsion,Reversion,Escape,Repulsion	215@L	268@M	264@K,203@E,273@I,B08	84	822	3	191	3.74639e-05	0.00864993
Escape,Escape	11@E	15@T	9@S	64	314	70	686	3.7517e-05	0.00864993
Attraction,Repulsion,Repulsion,Attraction	243@P	339@T	309@S,335@K,113@Q	5	10	17	1109	3.78989e-05	0.00871918
Escape,Reversion,Escape,Attraction	30@M	11@E	9@S,7@I,91@G	294	141	84	617	3.80637e-05	0.00873831
Escape	280@T	323@I		0	425	30	655	3.81836e-05	0.00874706
Escape	62@N	74@E		36	4	1099	3	3.91626e-05	0.00895216
Attraction,Escape,Reversion,Attraction,Escape,Repulsion	339@P	303@T	286@R,339@T,323@V,340@G,46@L	968	74	72	22	3.95095e-05	0.0090122
Reversion	339@P	31@M		3	1036	7	87	3.99055e-05	0.00908318
Repulsion,Attraction,Reversion	4@R	7@I	11@G,34@L	413	662	20	2	4.04821e-05	0.00918062
Escape,Repulsion,Escape,Reversion,Escape	339@Q	336@A	332@I,339@P,332@V,310@T	9	22	1053	56	4.058e-05	0.00918062
Repulsion	112@K	113@K		482	49	9	557	4.05911e-05	0.00918062
Repulsion,Escape	91@R	10@A	12@E	0	334	23	730	4.0866e-05	0.00922329
Attraction	69@K	62@S		9	76	11	1027	4.14123e-05	0.00932691
Repulsion,Repulsion	111@I	4@S	11@E	8	29	12	1077	4.2053e-05	0.00945131
Repulsion,Escape	82@V	60@L	82@L	7	918	10	138	4.23984e-05	0.00950898
Reversion,Escape,Repulsion	4@R	7@V	11@G,34@L	661	414	2	20	4.32829e-05	0.00968705
Attraction	122@G	123@N		3	3	1	572	4.34104e-05	0.0096953
Attraction,Repulsion	91@K	12@N	A74	19	453	1	614	4.46878e-05	0.0099598
Repulsion,Escape,Reversion	148@S	252@S	250@M,228@L	371	709	21	6	4.48381e-05	0.00997251
Attraction,Attraction	31@I	128@T	119@E	3	57	4	1062	4.60119e-05	0.0102123
Attraction,Escape,Reversion	260@D	168@V	335@K,182@E	392	47	686	5	4.71319e-05	0.0104393
Reversion,Reversion	242@T	211@E	146@P	928	42	164	0	4.7769e-05	0.0105585
Escape,Reversion,Escape	91@G	11@E	9@S,7@I	29	99	348	651	4.90381e-05	0.0108131
Escape	218@V	223@L		0	1053	5	73	4.91231e-05	0.0108131
Reversion,Attraction,Reversion,Escape	82@I	67@A	301@Y,75@F,72@S	37	96	641	232	4.93551e-05	0.0108419
Repulsion	128@I	224@Q		3	38	2	1085	5.05849e-05	0.0110893
Reversion,Attraction,Reversion,Repulsion,Attraction	207@D	260@E	215@L,B35,250@M,136@Q	32	29	657	411	5.07675e-05	0.011092
Escape,Repulsion,Escape	121@E	182@Q	B81,256@I	13	7	1041	65	5.08048e-05	0.011092
Escape,Escape,Reversion,Reversion	182@Q	242@T	B57,B58,250@M	902	161	71	3	5.14677e-05	0.0112139
Attraction	286@R	303@T		704	26	315	71	5.17426e-05	0.0112509
Attraction	12@K	72@T		521	130	40	427	5.1936e-05	0.01127
Escape,Attraction,Reversion	43@R	357@S	B07,362@I	365	719	22	6	5.26267e-05	0.0113586
Repulsion,Attraction	256@V	173@T	186@T	287	14	332	489	5.26341e-05	0.0113586
Repulsion	34@L	78@V		11	376	1	722	5.26627e-05	0.0113586
Repulsion,Repulsion,Repulsion	207@E	256@V	248@A,247@I	287	787	15	48	5.32076e-05	0.0114382
Escape	113@Q	112@K		24	549	529	17	5.34037e-05	0.0114382
Escape	340@G	115@V		0	557	15	518	5.34185e-05	0.0114382
Repulsion,Attraction	126@V	34@V	30@R	4	8	8	1087	5.34929e-05	0.0114382
Escape,Attraction,Escape	15@E	93@E	B40,94@I	0	11	574	507	5.35665e-05	0.0114382
Escape	12@K	72@S		129	522	427	40	5.37784e-05	0.0114606
Attraction	9@R	121@E		18	465	2	635	5.39325e-05	0.0114706
Attraction	15@Q	114@N		4	27	4	1082	5.41864e-05	0.011491
Escape,Repulsion,Escape	182@E	177@E	B81,186@T	2	5	1123	13	5.42434e-05	0.011491
Escape	126@E	243@L		103	8	1003	10	5.45498e-05	0.0115331
Repulsion	112@Q	91@E		14	541	0	576	5.58461e-05	0.0117839
Repulsion	62@K	115@I		7	251	0	852	5.61262e-05	0.0118197
Attraction,Escape,Escape	46@V	65@H	62@K,79@F	4	469	106	512	5.66013e-05	0.0118963
Escape	12@K	15@R		112	539	358	95	5.67646e-05	0.0119072
Repulsion	303@T	286@R		704	315	26	71	5.69915e-05	0.0119314
Repulsion	200@M	138@L		908	190	11	9	5.74153e-05	0.0119834
Attraction,Escape,Repulsion	43@R	357@G	B07,362@I	715	369	6	22	5.74638e-05	0.0119834
Repulsion,Repulsion	15@R	280@A	138@I	12	460	0	633	5.76106e-05	0.0119856
Escape,Escape,Escape	10@A	91@R	A74,A31	0	23	334	730	5.76984e-05	0.0119856
Repulsion,Attraction,Reversion,Escape,Escape	191@I	163@A	165@S,168@I,310@T,B57	6	7	1069	61	5.78904e-05	0.0120022
Repulsion,Attraction	264@K	215@M	252@S	6	29	29	1071	5.81833e-05	0.0120395
Repulsion,Reversion,Reversion	74@E	62@N	61@M,64@L	36	1099	4	3	5.97521e-05	0.0123403
Reversion,Reversion	91@K	10@G	12@E	442	29	613	2	6.15218e-05	0.0126523
Reversion	109@S	99@E		10	3	1113	1	6.15714e-05	0.0126523
Escape	90@E	55@D		1	242	50	828	6.16178e-05	0.0126523
Repulsion,Repulsion	312@D	332@I	336@G	29	497	4	581	6.19322e-05	0.0126925
Attraction,Reversion	115@A	362@V	357@G	473	61	539	5	6.25966e-05	0.0128042
Repulsion,Reversion,Reversion,Escape	54@S	62@N	61@M,64@L,74@E	19	844	21	212	6.37456e-05	0.0130143
Repulsion,Reversion,Escape	138@I	280@T	159@V,46@L	33	40	376	642	6.43751e-05	0.0131178
Attraction,Repulsion,Repulsion,Attraction	62@K	250@I	252@G,260@E,215@L	31	236	22	836	6.49817e-05	0.0131912
Escape,Reversion,Reversion,Escape	62@K	250@M	252@G,260@E,215@L	236	31	836	22	6.49817e-05	0.0131912
Escape,Attraction,Attraction,Repulsion,Reversion	46@L	72@S	12@K,62@E,301@Y,76@K	45	556	520	9	6.56724e-05	0.0133061
Repulsion,Escape	182@H	138@L	200@M	3	10	918	189	6.67771e-05	0.0135044
Repulsion,Escape,Repulsion,Reversion,Escape	207@D	260@D	215@L,B35,250@M,136@Q	29	32	410	658	6.71854e-05	0.0135613
Escape,Escape,Attraction,Attraction	223@P	228@L	252@S,252@G,256@V	5	6	67	1059	6.89831e-05	0.013898
Escape,Attraction,Attraction	182@S	186@S	190@T,B81	7	18	24	1095	6.92346e-05	0.0139222
Attraction,Attraction,Repulsion	260@E	182@H	138@S,143@I	10	682	1	440	6.93637e-05	0.0139222
Repulsion	62@R	28@P		4	79	0	1021	6.95897e-05	0.0139414
Escape,Escape,Escape,Repulsion,Attraction,Escape	15@A	12@E	91@G,91@N,15@Q,72@S,11@K	0	89	344	678	6.97323e-05	0.0139439
Attraction	123@G	120@A		481	11	42	21	7.09479e-05	0.0141605
Repulsion	256@V	120@D		14	282	5	824	7.31629e-05	0.0145753
Escape,Attraction	62@N	54@A	90@E	18	22	164	896	7.45246e-05	0.014819
Attraction,Repulsion	90@K	95@Q	93@K	24	137	24	947	7.47769e-05	0.0148248
Reversion	163@A	267@V		13	1059	8	60	7.48306e-05	0.0148248
Attraction	228@L	223@P		5	67	6	1059	7.73625e-05	0.015298
Escape,Attraction	62@E	72@S	12@K	77	11	455	554	7.84548e-05	0.0154854
Repulsion,Attraction,Escape	20@K	18@K	11@G,76@R	26	19	885	184	7.87707e-05	0.0155118
Escape	113@K	90@R		4	490	39	563	7.88785e-05	0.0155118
Attraction,Attraction	312@E	331@R	B08	27	551	8	512	8.08638e-05	0.015844
Escape,Escape	312@E	331@K	B08	551	27	512	8	8.08638e-05	0.015844
Attraction,Escape,Reversion,Attraction,Attraction,Attraction,Attraction,Repulsion,Reversion	145@Q	146@P	B57,C06,211@E,C08,242@N,149@A,176@A,168@V	230	881	5	0	8.20784e-05	0.0160326
Attraction	121@G	128@A		8	68	8	1013	8.21262e-05	0.0160326
Escape	148@T	142@M		4	3	1113	14	8.23335e-05	0.0160438
Escape,Repulsion,Escape,Escape	143@I	182@Q	B81,256@I,121@E	5	6	1058	68	8.25011e-05	0.0160456
Reversion	142@M	148@T		4	1113	3	14	8.26426e-05	0.0160456
Reversion	323@I	322@L		27	3	1103	1	8.45916e-05	0.0163712
Repulsion	323@I	322@M		3	27	1	1104	8.46257e-05	0.0163712
Repulsion	268@L	215@V		101	903	1	101	8.47888e-05	0.0163731
Attraction	12@K	102@D		635	14	331	105	8.54816e-05	0.0164772
Escape,Attraction	58@Q	109@K	112@K	7	9	38	1081	8.69867e-05	0.0167371
Reversion,Repulsion,Attraction	190@I	163@G	165@S,B57	11	4	40	1088	8.71758e-05	0.0167434
Attraction	62@L	120@T		3	3	46	1070	8.73687e-05	0.0167504
Repulsion,Reversion,Attraction	30@M	339@Q	336@G,83@A	27	408	4	697	8.80887e-05	0.0168582
Escape,Repulsion,Attraction,Repulsion	286@R	362@I	357@G,115@A,B07	62	643	4	384	8.911e-05	0.0170232
Attraction	182@H	138@S		5	8	1	1125	9.43594e-05	0.0179939
Repulsion,Reversion	280@T	148@S	142@M	403	19	681	5	9.5508e-05	0.0181805
Repulsion,Reversion	28@K	12@Q	115@A	8	354	50	681	9.57678e-05	0.0181976
Reversion	72@T	116@Q		531	24	570	1	9.67541e-05	0.0183524
Escape,Attraction,Attraction,Repulsion,Reversion,Reversion	65@Q	72@S	12@K,62@E,301@Y,76@K,46@L	545	463	20	103	9.77888e-05	0.0185158
Attraction,Escape	62@E	72@T	12@K	11	77	553	456	9.8092e-05	0.0185273
Reversion,Escape,Repulsion,Reversion	182@Q	267@V	163@A,173@S,310@S	17	1050	4	70	9.83513e-05	0.0185273
Escape,Escape,Escape,Escape,Escape,Repulsion	223@I	219@H	228@I,230@D,218@A,218@P,228@V	567	61	328	102	9.83692e-05	0.0185273
Repulsion	115@A	12@Q		47	496	11	533	9.90321e-05	0.0186194
Escape	15@R	110@R		0	474	19	611	0.000100337	0.0188317
Repulsion	30@R	34@V		11	298	1	782	0.000102621	0.0191744
Attraction,Escape,Escape,Repulsion,Escape	173@A	186@T	190@T,B81,177@D,142@M	32	3	1056	48	0.000102716	0.0191744
Attraction,Reversion	269@G	212@*	316@*	2	1137	4	0	0.000102799	0.0191744
Repulsion	340@A	121@G		59	456	19	542	0.00010288	0.0191744
Repulsion	256@V	182@A		6	296	0	840	0.000103305	0.0191856
Attraction,Repulsion	260@E	250@I	252@G	45	645	8	433	0.000103478	0.0191856
Escape,Reversion	260@E	250@M	252@G	645	45	433	8	0.000103478	0.0191856
Repulsion	112@Q	119@K		21	524	0	577	0.000104696	0.0193779
Reversion,Escape	28@H	30@K	34@L	11	299	253	525	0.00011026	0.0203724
Escape,Reversion	7@I	11@E	9@S	194	237	184	479	0.000112291	0.020702
Escape,Attraction,Attraction	91@N	15@K	93@K,90@A	57	32	282	733	0.000112431	0.020702
Repulsion	115@T	11@K		11	487	0	608	0.000113132	0.0207953
Reversion,Reversion,Escape,Attraction,Escape,Attraction	252@N	247@I	163@G,256@I,11@D,58@R,C06	453	1	606	32	0.000113972	0.0209137
Repulsion,Reversion	61@L	223@N	224@P	4	556	22	529	0.000114524	0.0209791
Repulsion,Escape	252@N	215@I	256@V	1	454	28	610	0.000114757	0.0209859
Attraction,Repulsion	309@A	310@T	10@A	584	502	25	6	0.000116403	0.0212504
Reversion,Attraction	82@V	60@I	82@L	916	9	138	10	0.000116702	0.0212687
Attraction,Escape,Repulsion	65@Q	72@T	12@K,62@E	463	545	102	21	0.000117648	0.0214047
Repulsion,Repulsion	248@T	218@P	219@Q	15	61	3	1054	0.00011788	0.0214105
Attraction,Escape,Attraction,Repulsion,Escape	215@I	252@N	228@L,219@Q,228@I,173@S	1	28	454	610	0.000118983	0.0215743
Attraction,Escape,Escape,Reversion	83@A	228@I	248@T,219@H,248@G	109	1005	4	2	0.000119594	0.0216483
Escape,Attraction,Escape	31@I	28@H	C17,30@M	17	44	293	785	0.000121551	0.0219654
Repulsion	163@A	267@I		1057	14	60	8	0.000123217	0.0221705
Escape,Escape,Attraction,Attraction,Attraction,Repulsion,Repulsion	81@T	228@M	248@T,219@Q,252@S,248@G,252@G,253@N	888	181	25	10	0.000123278	0.0221705
Repulsion,Escape,Reversion,Reversion	215@L	252@S	250@M,228@L,148@S	280	618	109	83	0.000123308	0.0221705
Repulsion,Repulsion	309@A	286@R	303@T	729	357	0	31	0.000124302	0.0223118
Reversion,Attraction,Reversion	72@S	67@A	301@Y,75@F	134	354	548	16	0.000130426	0.0233717
Reversion	303@T	286@K		313	706	70	27	0.000131373	0.0235021
Attraction,Escape	58@K	119@Q	118@Q	0	514	12	570	0.000131995	0.023574
Escape,Repulsion,Repulsion,Attraction	182@E	168@I	335@K,260@D,146@A	5	2	46	1087	0.000132533	0.0236305
Attraction	335@K	244@Q		644	0	483	13	0.000133532	0.0237691
Repulsion,Attraction,Repulsion	335@K	339@S	340@G,90@E	14	628	13	483	0.000134618	0.0238917
Attraction	119@E	128@T		4	40	3	1065	0.000134667	0.0238917
Escape,Attraction,Attraction,Escape,Escape,Escape	95@R	28@K	A03,67@S,30@R,A30,12@Q	54	529	292	188	0.000135899	0.0240703
Attraction,Escape	339@T	303@T	286@R	13	9	1030	87	0.000137222	0.0242646
Attraction,Attraction,Reversion,Repulsion	20@R	76@K	75@I,A01,18@K	626	401	23	42	0.000137804	0.0243271
Reversion	72@T	42@E		548	15	569	0	0.000138252	0.0243325
Escape	61@M	53@T		233	18	844	13	0.000138289	0.0243325
Repulsion	252@S	215@M		27	364	8	710	0.000138693	0.0243468
Attraction,Escape,Reversion,Reversion	315@N	312@E	B44,303@V,331@K	563	524	13	2	0.000138949	0.0243468
Escape,Attraction	322@M	323@I	280@T	3	1	27	1104	0.000139114	0.0243468
Attraction,Escape	252@S	215@L	260@D	280	109	618	83	0.000139281	0.0243468
Attraction,Escape,Reversion,Attraction,Attraction,Attraction,Attraction,Repulsion,Reversion,Attraction	148@A	146@P	B57,C06,211@E,C08,242@N,149@A,176@A,168@V,145@Q	19	1	212	880	0.000140484	0.0245171
Escape	173@T	121@N		3	604	20	477	0.000141403	0.0246239
Repulsion,Attraction,Repulsion,Reversion,Attraction,Repulsion	260@E	211@D	146@P,A25,242@T,339@P,280@A	34	656	5	436	0.000141556	0.0246239
Reversion	15@K	226@G		337	7	773	0	0.000143075	0.0248477
Escape,Attraction	126@E	127@K	106@K	109	2	441	555	0.000143565	0.0248924
Attraction,Attraction	90@E	61@M	62@N	124	118	126	737	0.000146435	0.0253489
Escape,Repulsion,Escape,Reversion,Escape,Escape	312@E	336@A	332@I,339@P,332@V,310@T,339@Q	548	35	484	43	0.000146784	0.0253683
Repulsion,Repulsion,Repulsion,Repulsion,Escape	223@N	256@V	248@A,247@I,207@E,186@T	3	23	299	815	0.000147942	0.0255271
Reversion,Repulsion,Reversion	91@K	121@A	124@N,123@A	9	460	47	562	0.000149429	0.0257422
Escape	331@K	263@R		3	1089	3	33	0.000149956	0.0257915
Reversion,Reversion,Repulsion	211@E	280@V	301@Y,159@V	638	448	14	26	0.000152021	0.0261046
Attraction,Attraction,Escape	111@I	61@M	62@N,90@E	2	35	247	816	0.000153543	0.0262886
Repulsion,Attraction,Repulsion	260@E	215@V	268@L,252@S	77	593	25	414	0.000153584	0.0262886
Repulsion,Repulsion	62@K	90@E	54@S	147	117	96	761	0.000154062	0.0263283
Attraction,Escape	173@T	138@I	280@A	24	593	51	433	0.000154499	0.0263469
Repulsion,Repulsion,Repulsion,Repulsion	268@L	332@I	336@G,312@D,339@P	33	990	0	103	0.000154663	0.0263469
Escape,Repulsion	132@Y	136@Q	264@G	1083	5	30	3	0.000157173	0.026732
Repulsion	286@K	53@N		9	376	0	732	0.000158455	0.0269072
Escape,Escape	286@R	309@S	312@D	0	729	28	360	0.000159406	0.0270258
Reversion,Attraction,Reversion	46@L	60@I	82@L,82@V	584	19	530	0	0.000162112	0.0274411
Attraction,Attraction	28@H	31@L	301@Y	285	25	780	47	0.000162504	0.027464
Escape,Attraction,Attraction,Attraction,Attraction	147@M	186@S	190@T,B81,182@S,177@D	5	9	26	1101	0.000163669	0.0276172
Escape,Escape,Repulsion	122@T	15@A	12@E,91@N	9	448	13	132	0.000164628	0.0277353
Repulsion,Repulsion,Escape	252@N	247@V	163@G,256@I	0	454	30	609	0.000164988	0.0277522
Repulsion,Escape,Reversion,Reversion,Escape	256@V	252@S	250@M,228@L,148@S,215@L	142	158	251	563	0.000166091	0.0278939
Repulsion,Attraction	90@E	339@S	340@G	18	224	8	882	0.000166772	0.027944
Attraction,Repulsion	229@K	288@R	212@*	4	1	2	1137	0.000167173	0.027944
Escape,Reversion	229@K	288@G	212@*	1	4	1137	2	0.000167173	0.027944
Escape,Escape,Attraction,Reversion	252@N	118@A	119@Q,126@R,125@N	411	30	564	52	0.00016771	0.0279901
Reversion,Reversion,Attraction,Attraction,Reversion	186@T	256@I	248@A,247@I,223@N,207@D	786	300	39	12	0.00017016	0.0283387
Attraction	127@N	126@G		11	0	405	690	0.000170329	0.0283387
Attraction,Attraction,Attraction,Repulsion,Attraction	312@E	336@G	332@I,339@Q,332@V,310@T	33	550	42	485	0.000171543	0.0284554
Repulsion,Attraction	123@N	75@I	76@K	3	1	19	542	0.000171562	0.0284554
Attraction	20@K	68@V		3	42	1	1093	0.000172176	0.028513
Repulsion	46@L	218@I		16	588	0	527	0.000173515	0.0286904
Attraction,Attraction	138@A	143@I	182@H	3	22	8	1104	0.000174846	0.0288658
Escape,Attraction	61@M	30@M	28@Q	203	47	230	629	0.000178691	0.0294551
Reversion,Escape,Repulsion,Attraction	9@S	7@V	11@G,34@L,4@R	469	51	193	383	0.000179626	0.0295636
Escape,Attraction	343@I	112@K	113@Q	3	5	556	560	0.000181288	0.0297914
Attraction	126@R	118@T		6	14	37	1036	0.00018195	0.0298544
Repulsion,Attraction,Repulsion	242@T	211@D	146@P,A25	39	931	0	164	0.000182752	0.0299399
Attraction,Escape,Repulsion,Escape	301@Y	72@T	12@K,62@E,65@Q	8	545	558	27	0.000186008	0.0303876
Reversion	42@E	119@G		8	1098	3	12	0.000186053	0.0303876
Escape	138@A	143@V		19	6	1099	12	0.000187445	0.0305685
Repulsion,Repulsion	76@K	62@T	165@N	33	612	5	443	0.000187865	0.0305903
Repulsion,Escape,Repulsion	46@L	60@L	82@L,82@V	17	586	0	530	0.000192904	0.0313405
Escape,Attraction,Escape,Escape,Repulsion,Escape	18@K	28@H	C17,30@M,31@I,182@T,30@M	201	710	107	97	0.000193058	0.0313405
Escape,Escape,Attraction,Attraction,Attraction,Repulsion	253@N	228@M	248@T,219@Q,252@S,248@G,252@G	923	189	1	4	0.000194622	0.0315464
Reversion,Escape	46@L	218@V	219@Q	565	38	482	38	0.000196691	0.0317955
Attraction,Attraction,Escape	260@E	264@G	136@R,B27	0	693	7	434	0.000196753	0.0317955
Attraction,Attraction,Attraction,Repulsion,Attraction,Reversion	339@P	336@G	332@I,339@Q,332@V,310@T,312@E	41	1003	34	60	0.000198531	0.0320344
Reversion	20@K	68@L		36	9	1055	32	0.00020029	0.0322248
Escape	106@K	127@K		4	6	553	553	0.000200313	0.0322248
Attraction,Repulsion,Attraction,Attraction,Escape,Escape,Reversion	67@A	11@G	9@S,7@I,301@Y,91@G,93@K,123@D	296	383	355	14	0.000202006	0.0324483
Escape,Escape	62@N	58@K	90@E	27	13	501	572	0.000204088	0.0327336
Attraction,Reversion,Attraction	223@H	224@P	223@N,225@P	5	2	28	1106	0.000205059	0.0328401
Escape,Escape,Repulsion,Attraction	91@G	61@I	301@Y,62@N,59@Q	65	62	222	760	0.000205448	0.0328532
Escape,Attraction,Escape,Escape,Repulsion,Escape,Repulsion,Attraction	309@S	28@H	C17,30@M,31@I,182@T,30@M,18@K,86@Y	20	8	290	821	0.000206876	0.0330322
Escape	4@S	14@D		18	3	1111	5	0.000208418	0.0332289
Reversion,Escape,Attraction	20@K	18@R	11@G,76@R	18	27	176	893	0.000208923	0.0332598
Repulsion,Repulsion	125@S	121@G	340@A	53	314	5	128	0.000209548	0.0332781
Repulsion,Attraction,Repulsion,Attraction	68@V	20@K	112@Q,A74,12@K	3	1	42	1093	0.000209818	0.0332781
Escape,Reversion,Attraction,Escape	30@R	34@I	7@I,11@G,12@E	184	111	484	291	0.000209971	0.0332781
Escape	10@A	310@S		18	4	482	605	0.000211153	0.0334159
Attraction,Repulsion	91@K	118@T	126@R	28	431	13	587	0.000211891	0.0334832
Escape,Escape,Escape,Repulsion	163@A	147@I	B57,B13,A25	805	251	22	46	0.000212718	0.0335448
Escape,Escape,Escape,Repulsion,Attraction,Escape,Escape	54@A	12@E	91@G,91@N,15@Q,72@S,11@K,15@A	23	157	301	592	0.000212908	0.0335448
Attraction	10@A	310@T		4	18	602	485	0.000213985	0.0336649
Repulsion	256@V	226@N		6	296	0	840	0.000215012	0.0337768
Attraction,Attraction,Escape,Reversion,Attraction,Reversion	72@S	12@K	91@N,91@G,A74,20@R,15@Q	129	427	522	40	0.000215746	0.0338424
Attraction	138@A	104@L		3	22	4	1106	0.000216294	0.0338722
Attraction,Attraction,Repulsion,Repulsion,Escape,Repulsion,Attraction	357@S	242@N	B57,B58,250@M,182@Q,C06,B57	65	323	84	645	0.000216569	0.0338722
Attraction,Attraction,Escape,Repulsion,Repulsion	55@E	61@M	62@N,90@E,111@I,93@D	233	678	17	138	0.000221147	0.0345376
Reversion,Repulsion	123@A	121@A	124@N	6	2	18	546	0.000221618	0.0345607
Attraction,Attraction	54@A	79@H	C14	7	173	5	911	0.000225061	0.0350466
Escape,Reversion,Attraction,Escape,Escape	78@V	34@I	7@I,11@G,12@E,30@R	1	11	694	391	0.000225764	0.0351049
Escape	219@H	228@V		2	928	6	163	0.000226258	0.0351307
Attraction,Reversion,Reversion	286@R	362@V	357@G,115@A	642	63	384	4	0.00022947	0.0355778
Reversion	228@I	83@A		109	4	1005	2	0.000230629	0.0357058
Repulsion,Reversion,Reversion	121@D	35@V	39@R,72@T	828	66	193	2	0.000235877	0.0364478
Repulsion,Attraction	186@M	64@I	62@N	3	8	14	1113	0.000236572	0.0364478
Escape,Attraction,Escape,Escape	182@T	28@H	C17,30@M,31@I	0	13	310	817	0.000237344	0.0364478
Escape,Attraction,Escape,Repulsion,Repulsion	176@S	146@A	B57,C06,C08,211@E	815	281	5	12	0.000238235	0.0364478
Escape,Repulsion	79@Y	62@G	55@G	259	364	76	347	0.00023825	0.0364478
Repulsion,Attraction,Escape,Escape	219@H	248@T	228@I,11@E,252@H	24	905	55	114	0.000238739	0.0364478
Reversion	62@G	81@T		331	18	703	15	0.000238876	0.0364478
Escape,Attraction,Reversion,Escape,Repulsion	336@A	112@K	113@Q,343@I,62@K,126@G	558	490	1	75	0.000239126	0.0364478
Repulsion,Repulsion,Repulsion	339@P	332@I	336@G,312@D	25	1019	8	86	0.000239143	0.0364478
Reversion,Attraction	312@D	203@D	301@Y	423	102	164	424	0.00023917	0.0364478
Repulsion,Escape	312@D	203@E	301@Y	102	423	424	164	0.00023917	0.0364478
Escape	95@K	93@G		0	446	18	634	0.00024002	0.0365253
Attraction	62@N	74@G		3	37	2	1100	0.000241394	0.0366822
Repulsion,Attraction,Attraction	114@R	252@H	301@Y,228@L	11	19	65	987	0.000244432	0.0370913
Repulsion,Attraction	219@Q	75@L	88@V	151	3	861	70	0.000245307	0.0371713
Escape,Attraction,Escape,Repulsion	331@K	312@D	B44,303@V,309@S	511	553	8	27	0.000251264	0.0380202
Attraction,Escape,Reversion	200@M	138@I	280@A,173@T	73	1022	4	16	0.000252541	0.0381594
Reversion,Escape,Escape,Escape	31@I	30@K	34@L,28@H,A24	0	61	264	762	0.000257342	0.0387993
Attraction,Reversion,Repulsion,Reversion,Attraction,Reversion	252@N	219@Q	228@I,218@V,280@T,223@I,230@D	39	398	115	513	0.000257502	0.0387993
Attraction,Attraction,Escape,Escape	15@R	93@K	15@E,95@Q,15@K	2	476	37	595	0.00025794	0.0388107
Reversion,Repulsion,Reversion,Attraction,Attraction	147@L	91@K	12@K,124@K,10@G,A31	123	145	344	465	0.000258553	0.0388484
Attraction	28@C	91@Q		5	44	15	1074	0.00025956	0.0389449
Repulsion	111@I	115@M		5	32	4	1079	0.000260422	0.0390195
Escape,Attraction,Attraction	79@H	54@A	90@E,62@N	7	5	173	911	0.000260857	0.0390301
Escape,Repulsion,Escape,Escape,Attraction	242@N	182@Q	B81,256@I,121@E,143@I	148	2	917	72	0.000261476	0.039068
Escape	54@A	68@I		0	182	33	878	0.000262982	0.0392382
Escape,Attraction,Attraction	301@Y	72@S	12@K,62@E	545	8	26	559	0.000264073	0.0393461
Escape,Escape	124@D	123@G	122@G	2	5	486	50	0.000264611	0.0393714
Attraction,Repulsion,Attraction,Escape,Reversion	242@T	159@I	280@V,186@T,280@I,219@H	512	449	124	36	0.000265302	0.0394195
Attraction,Attraction	86@F	120@T	62@L	3	6	46	1064	0.00026802	0.0397681
Escape	122@G	123@G		0	6	498	56	0.000270963	0.040149
Reversion,Escape,Repulsion	310@S	267@V	163@A,173@S	10	493	11	600	0.0002718	0.0402173
Attraction	20@K	49@S		6	39	14	1072	0.00027319	0.0403673
Escape	90@E	132@F		0	243	31	846	0.000274876	0.0405603
Repulsion,Repulsion,Repulsion,Repulsion	186@T	256@V	248@A,247@I,207@E	291	799	11	40	0.000277379	0.0408103
Escape,Escape,Repulsion	18@K	76@R	75@I,A01	385	487	42	161	0.000277544	0.0408103
Attraction,Attraction,Escape,Repulsion,Repulsion,Reversion,Repulsion	186@T	61@M	62@N,90@E,111@I,93@D,55@E,58@R	241	818	10	41	0.000277715	0.0408103
Attraction,Repulsion	310@T	182@S	B81	25	584	0	508	0.0002787	0.0408541
Attraction	247@V	11@D		3	26	3	1101	0.000278777	0.0408541
Escape,Attraction,Escape,Repulsion,Attraction,Escape,Escape	30@R	62@K	111@S,90@E,69@K,61@I,65@H,112@K	23	288	243	536	0.000284334	0.0416115
Repulsion,Attraction,Attraction,Attraction,Attraction,Reversion	79@Y	62@E	72@S,55@G,69@K,B57,69@R	45	592	38	392	0.000285014	0.0416541
Attraction,Escape,Reversion	331@K	312@E	B44,303@V	551	512	27	8	0.000285795	0.0417112
Repulsion	165@N	93@Q		5	49	4	1075	0.000288841	0.0420983
Escape,Escape,Escape,Reversion	84@T	91@R	A74,A31,10@A	203	596	126	153	0.000291781	0.042469
Reversion,Escape,Reversion	7@I	4@R	111@I,11@E	413	20	662	2	0.000292844	0.0425511
Escape,Attraction,Attraction,Escape,Escape,Escape,Escape	122@K	28@K	A03,67@S,30@R,A30,12@Q,95@R	2	50	337	203	0.000293141	0.0425511
Attraction,Attraction,Escape,Repulsion,Repulsion,Reversion	58@R	61@M	62@N,90@E,111@I,93@D,55@E	29	510	221	324	0.000294411	0.0426776
Repulsion,Escape	159@V	125@C	124@S	0	442	8	94	0.000295484	0.0427399
Attraction,Attraction,Reversion,Repulsion,Escape	15@K	76@K	75@I,A01,18@K,20@R	179	157	461	276	0.000296238	0.0427399
Escape,Reversion,Escape,Attraction,Repulsion	242@T	159@V	280@V,186@T,280@I,219@H	447	514	36	124	0.000296292	0.0427399
Escape,Escape,Escape	332@S	243@L	126@E,62@N	6	4	1115	14	0.000296439	0.0427399
Repulsion,Repulsion,Repulsion	340@A	15@Q	91@R,12@K	25	505	5	569	0.000297366	0.0427676
Reversion,Escape,Escape	61@I	69@Q	12@K,62@E	231	57	740	60	0.000297713	0.0427676
Escape,Escape	163@A	190@I	186@T	4	1070	11	57	0.00029783	0.0427676
Repulsion	126@E	55@K		6	105	2	1008	0.000300631	0.0431119
Escape,Attraction,Escape,Escape,Escape	91@R	93@E	B40,94@I,15@E,B41	140	179	404	332	0.000301166	0.0431308
Escape,Attraction,Escape,Escape,Attraction	61@I	69@K	67@S,62@E,62@K,203@E	48	240	37	775	0.000303249	0.043371
Attraction,Attraction	244@A	62@R	122@K	3	8	80	1016	0.000304516	0.0434942
Attraction,Escape	322@M	323@V	280@T	1	3	1097	34	0.000305965	0.0436428
Repulsion,Reversion	90@A	109@N	112@K	82	24	974	51	0.000306493	0.04366
Escape,Attraction,Attraction,Repulsion,Escape	68@I	54@A	90@E,62@N,79@H,84@T	0	33	182	878	0.000307827	0.0437788
Escape,Escape,Escape,Repulsion,Attraction	148@A	147@I	B57,B13,A25,163@A	20	0	805	297	0.000308146	0.0437788
Reversion	127@K	107@E		541	15	560	0	0.000310247	0.0440189
Attraction	362@I	361@K		3	59	1	1050	0.00031321	0.0443804
Reversion	86@Y	66@S		13	1075	4	16	0.000314578	0.0445153
Attraction,Attraction	146@A	176@S	72@T	815	5	281	12	0.000315957	0.0446514
Escape,Reversion	309@A	310@S	10@A	500	586	5	26	0.000318616	0.0449678
Escape,Escape,Reversion,Escape,Escape	173@A	165@S	163@G,168@I,147@L,186@S	30	4	1051	54	0.000319676	0.0450579
Repulsion	7@V	130@H		12	642	0	432	0.000322537	0.0454014
Attraction,Repulsion,Repulsion,Repulsion	15@R	75@F	62@Q,11@G,67@A	7	469	5	628	0.000323388	0.0454613
Repulsion,Repulsion,Reversion,Repulsion,Repulsion	7@I	4@S	11@E,111@I,14@D,252@S	19	414	2	662	0.000324049	0.0454944
Escape,Repulsion	127@K	126@E	9@S	109	441	2	555	0.000328897	0.0461146
Repulsion,Escape,Repulsion	78@L	67@S	301@Y,75@F	359	682	2	10	0.000331463	0.0464134
Escape,Escape,Escape,Repulsion,Attraction,Escape,Escape,Reversion,Escape,Escape	90@E	12@E	91@G,91@N,15@Q,72@S,11@K,15@A,54@A,10@G,11@E	4	238	339	523	0.000334353	0.046757
Reversion,Escape,Attraction,Reversion	215@L	218@V	219@Q,46@L,248@G	834	75	190	4	0.000335707	0.046885
Attraction,Repulsion,Attraction,Escape	219@H	159@I	280@V,186@T,280@I	524	393	97	69	0.000339405	0.0473397
Escape,Reversion	79@Y	55@E	62@E	523	107	386	42	0.000340663	0.0474328
Escape,Escape,Reversion	247@I	58@K	90@E,62@N	496	580	32	1	0.000340959	0.0474328
Attraction,Repulsion	15@R	348@S	54@A	6	470	0	633	0.000343374	0.0476647
Attraction	331@K	263@K		1087	5	33	3	0.000343866	0.0476647
Repulsion,Attraction,Attraction,Attraction	14@E	30@R	9@S,A24,B42	4	1	311	786	0.000344401	0.0476647
Reversion	200@M	138@A		21	1097	4	16	0.000344408	0.0476647
Attraction,Attraction,Escape,Reversion,Attraction	58@K	94@V	30@M,93@D,A31,104@I	482	41	427	119	0.000348343	0.0481469
Attraction,Escape,Escape,Attraction	39@K	65@H	62@K,79@F,46@V	10	12	101	1010	0.000348797	0.0481475
Repulsion,Reversion	121@D	122@D	30@M	0	475	5	122	0.000352741	0.0485698
Reversion,Reversion,Escape,Escape,Attraction,Escape	339@Q	211@E	146@P,242@T,A25,280@A,260@D	27	4	1067	38	0.000353143	0.0485698
Attraction,Attraction,Attraction,Escape,Escape	309@S	147@L	B57,B13,A25,286@R	2	26	275	823	0.000353219	0.0485698
Attraction	113@K	106@E		499	0	590	15	0.000354982	0.0487497
Reversion,Escape,Attraction	104@I	83@A	228@I,339@Q	1034	3	66	3	0.000358011	0.0491026
Escape,Repulsion,Escape,Reversion,Escape,Escape,Attraction	173@S	336@A	332@I,339@P,332@V,310@T,339@Q,312@E	459	1	582	77	0.000358877	0.0491302
Repulsion,Attraction,Reversion,Escape	9@S	7@I	11@G,34@L,4@R	51	469	382	194	0.00035946	0.0491302
Escape,Escape,Repulsion,Reversion	20@R	76@R	75@I,A01,18@K	395	636	41	24	0.000359873	0.0491302
Escape,Repulsion,Repulsion,Attraction,Escape	252@G	168@I	335@K,260@D,146@A,182@E	1	138	50	947	0.000360049	0.0491302
Escape,Escape	61@I	111@S	62@K	185	100	727	78	0.00036089	0.0491821
Escape,Escape	228@L	232@R	1@I	67	5	1063	3	0.000362448	0.0493317
Attraction,Repulsion,Escape	53@S	310@T	10@A,309@A	11	10	596	495	0.000365542	0.0496896
Escape	58@R	146@T		0	551	12	538	0.000368304	0.0499415
Escape	224@P	66@P		28	5	1060	13	0.000368329	0.0499415
Reversion,Reversion,Attraction,Attraction	207@D	256@I	248@A,247@I,223@N	45	16	776	296	0.000371237	0.050272
Escape,Repulsion	78@V	12@D	55@E	4	8	13	1105	0.000374481	0.0506473
Escape	119@Q	118@A		7	6	1011	77	0.000375548	0.0506851
Repulsion,Repulsion	225@P	223@I	230@E	645	431	0	11	0.000376323	0.0506851
Repulsion	146@P	149@A		4	231	0	881	0.000376562	0.0506851
Repulsion	113@Q	112@Q		542	31	12	541	0.000376656	0.0506851
Escape,Repulsion,Escape	267@V	173@S	264@K,256@I	0	21	461	638	0.000377708	0.0507629
Repulsion,Repulsion,Repulsion,Repulsion,Escape,Attraction	215@I	256@V	248@A,247@I,207@E,186@T,223@N	22	7	280	830	0.000383667	0.0514363
Attraction,Escape	177@E	182@E	B81	2	1123	5	13	0.000383958	0.0514363
Attraction,Attraction,Attraction,Attraction	173@A	165@N	163@G,168@I,186@S	4	30	51	1054	0.000384161	0.0514363
Escape	35@V	39@K		4	1060	18	51	0.000385334	0.0515287
Repulsion	357@S	125@K		10	102	5	422	0.000388253	0.0518543
Escape,Reversion,Escape,Attraction	219@H	159@V	280@V,186@T,280@I	391	526	69	97	0.000395747	0.0527893
Escape,Repulsion	269@G	212@W	316@*	1136	3	0	4	0.000397425	0.052947
Repulsion,Attraction,Escape	252@H	248@T	228@I,11@E	0	82	79	953	0.000405614	0.0539709
Repulsion,Escape	343@I	112@Q	113@Q	5	3	548	575	0.00040647	0.0540176
Repulsion,Repulsion,Escape,Attraction	11@D	247@V	163@G,256@I,252@N	3	3	26	1101	0.000410913	0.054491
Attraction,Escape,Attraction,Reversion	310@T	215@L	260@D,252@S,219@Q	467	139	430	52	0.000411051	0.054491
Escape,Escape,Escape,Repulsion	117@Q	243@L	126@E,62@N,332@S	1066	13	41	3	0.000412608	0.0546297
Attraction,Repulsion,Reversion,Attraction,Escape,Escape	31@M	339@P	340@A,336@A,335@K,113@K,303@A	3	7	1036	87	0.000414183	0.0547704
Escape,Escape	126@R	118@A	119@Q	11	9	996	73	0.00041499	0.0548095
Reversion,Escape,Attraction	248@G	218@V	219@Q,46@L	402	9	632	69	0.000416025	0.0548361
Escape,Attraction	66@S	93@G	95@K	3	14	15	1075	0.000416217	0.0548361
Escape,Escape,Escape,Repulsion,Attraction,Attraction,Escape	146@S	147@I	B57,B13,A25,163@A,148@A,B15	8	17	816	277	0.000419945	0.0552592
Escape,Reversion,Escape,Attraction,Attraction	4@S	11@E	9@S,7@I,91@G,30@M	20	1	358	757	0.000422274	0.0554738
Escape,Escape,Reversion	54@S	90@A	9@S,91@K	59	802	46	186	0.000422613	0.0554738
Repulsion,Attraction	252@S	215@V	268@L	50	338	49	656	0.00042383	0.0555408
Attraction,Attraction,Reversion	118@A	31@L	301@Y,28@H	948	68	81	1	0.000424162	0.0555408
Attraction,Attraction,Escape,Repulsion	93@D	61@M	62@N,90@E,111@I	129	278	122	542	0.000426616	0.0556611
Escape	138@A	200@M		21	4	1097	16	0.000426793	0.0556611
Attraction	138@A	200@I		4	21	16	1097	0.000426793	0.0556611
Escape	15@K	104@I		295	39	721	29	0.000427628	0.0556611
Repulsion	9@R	42@D		11	485	0	636	0.000427682	0.0556611
Repulsion	136@Q	132@Y		1083	30	5	3	0.000431282	0.0560202
Reversion	115@M	180@T		6	3	1114	2	0.000431489	0.0560202
Reversion,Reversion,Attraction,Attraction,Reversion,Attraction,Escape	215@I	256@I	248@A,247@I,223@N,207@D,186@T,146@P	7	22	816	290	0.000434929	0.0563984
Attraction,Attraction	312@D	309@A	286@R	523	3	560	28	0.000435702	0.0564303
Repulsion,Reversion,Escape,Repulsion,Attraction	148@A	280@T	159@V,46@L,138@I,312@E	18	0	406	688	0.00044106	0.0570297
Escape	120@A	128@S		1	1031	3	81	0.000441396	0.0570297
Reversion	62@K	61@L		11	256	539	291	0.00044222	0.0570672
Escape,Attraction,Escape,Repulsion,Attraction,Escape,Escape,Escape	61@L	62@K	111@S,90@E,69@K,61@I,65@H,112@K,30@R	11	539	256	291	0.000443554	0.0571106
Attraction,Attraction	143@I	182@H	138@S	5	6	8	1118	0.000443624	0.0571106
Escape,Attraction,Escape,Repulsion,Repulsion,Attraction	168@I	146@A	B57,C06,C08,211@E,176@S	48	3	772	290	0.000444174	0.0571127
Repulsion	280@T	115@E		6	420	0	671	0.000445522	0.0572172
Attraction,Repulsion,Escape,Reversion,Attraction	78@V	34@L	7@I,11@G,12@E,85@L	11	1	376	722	0.00044664	0.057292
Attraction,Escape,Escape,Attraction,Escape	54@A	79@Y	65@H,A01,C14,A29	82	92	554	333	0.000447694	0.0573585
Escape,Escape,Escape,Escape,Escape,Repulsion,Reversion,Escape,Attraction	252@N	219@H	228@I,230@D,218@A,218@P,228@V,223@I,310@S,121@G	391	42	508	120	0.000450436	0.0576408
Escape,Escape	62@N	243@L	126@E	36	4	1089	14	0.000451781	0.0577437
Attraction,Reversion	99@E	109@S	B42	10	1113	3	1	0.000455624	0.0581655
Attraction,Escape,Reversion,Reversion,Attraction,Attraction,Repulsion	116@Q	312@E	B44,303@V,331@K,315@N,292@S,309@S	580	494	3	22	0.000457134	0.0582887
Attraction,Escape,Escape,Attraction,Repulsion,Attraction	62@R	65@H	62@K,79@F,46@V,39@K,54@A	15	68	95	923	0.000458827	0.0584349
Attraction,Attraction,Attraction,Escape,Escape,Escape	148@A	147@L	B57,B13,A25,286@R,309@S	0	20	277	827	0.000462122	0.0587845
Attraction	54@A	348@S		4	177	2	912	0.000463662	0.0588631
Reversion	34@L	38@S		380	8	721	1	0.00046384	0.0588631
Repulsion,Reversion	248@A	116@K	72@T	6	586	6	508	0.000467855	0.0593023
Attraction,Repulsion,Repulsion,Repulsion	15@R	12@N	A74,91@K,72@T	12	467	8	627	0.000473751	0.0599786
Repulsion,Attraction	58@R	113@K	112@K	435	97	37	507	0.000476832	0.06019
Escape,Escape,Attraction,Repulsion,Escape	58@K	94@I	30@M,93@D,A31,104@I	41	482	118	429	0.000477321	0.06019
Escape,Escape	302@R	143@V	138@A	25	3	1088	15	0.000477453	0.06019
Repulsion,Reversion,Attraction	340@G	223@V	224@A,230@E	239	324	103	393	0.000477672	0.06019
Repulsion	215@V	95@L		4	98	2	1012	0.000483785	0.0608886
Escape,Attraction,Attraction,Repulsion,Escape,Attraction	65@H	54@A	90@E,62@N,79@H,84@T,68@I	31	80	149	834	0.000486078	0.0611053
Escape,Repulsion,Reversion	93@D	136@Q	264@G,132@Y	416	7	670	2	0.000489327	0.0614415
Attraction,Attraction,Escape,Reversion,Attraction,Reversion,Reversion	69@Q	12@K	91@N,91@G,A74,20@R,15@Q,72@S	550	427	97	18	0.000491282	0.0616147
Escape,Escape,Attraction,Escape,Attraction	168@V	252@G	250@M,228@L,138@A,248@G	138	945	1	52	0.000492591	0.0616894
Escape	335@K	244@A		0	644	11	485	0.000493031	0.0616894
Escape	20@K	49@G		37	8	1055	27	0.000496282	0.0620237
Attraction,Escape,Attraction,Reversion,Escape	86@W	215@L	260@D,252@S,219@Q,310@T	0	5	917	190	0.000498123	0.0621811
Reversion,Repulsion	15@T	177@D	186@T	8	127	5	996	0.000501159	0.0624871
Reversion,Attraction	119@K	111@I	4@R	4	17	33	1065	0.000505489	0.0629537
Escape,Attraction,Attraction,Repulsion,Reversion,Reversion,Attraction	62@G	72@S	12@K,62@E,301@Y,76@K,46@L,65@Q	346	9	164	557	0.000506921	0.0630586
Attraction,Attraction,Reversion,Escape	128@T	31@L	301@Y,28@H,118@A	4	3	1050	67	0.000509789	0.0633417
Reversion,Reversion,Attraction,Attraction,Reversion,Attraction	146@P	256@I	248@A,247@I,223@N,207@D,186@T	194	39	607	272	0.000514556	0.0638598
Repulsion,Attraction,Attraction,Attraction,Attraction	34@V	30@R	9@S,A24,B42,14@E	11	1	298	782	0.000518167	0.0641851
Escape,Reversion,Attraction	12@E	34@I	7@I,11@G	274	48	395	355	0.000518836	0.0641851
Repulsion	67@S	127@H		5	356	0	680	0.000519443	0.0641851
Attraction,Repulsion,Repulsion	67@A	75@F	62@Q,11@G	12	671	0	371	0.000519577	0.0641851
Escape,Escape,Escape,Repulsion,Attraction	147@I	243@L	126@E,62@N,332@S,117@Q	822	5	285	13	0.000524077	0.0646663
Repulsion,Repulsion,Repulsion,Repulsion,Escape,Attraction,Escape	146@P	256@V	248@A,247@I,207@E,186@T,223@N,215@I	37	198	264	616	0.000526723	0.064918
Escape,Attraction,Reversion,Escape	126@G	112@K	113@Q,343@I,62@K	19	395	531	158	0.000527898	0.064988
Escape,Attraction,Attraction,Repulsion	84@T	54@A	90@E,62@N,79@H	147	647	32	260	0.000528821	0.0650268
Attraction,Repulsion	228@L	232@K	1@I	4	68	1	1065	0.000532065	0.0653506
Escape,Escape,Attraction	326@S	128@V	124@D,121@G	128	0	893	79	0.000535738	0.0657262
Escape,Escape,Reversion	147@L	165@S	163@G,168@I	244	33	822	25	0.000537178	0.0658274
Attraction	123@A	124@A		3	5	8	551	0.000538279	0.0658868
Repulsion,Repulsion,Attraction	34@L	332@A	C08,B44	6	380	0	723	0.000540617	0.0660974
Escape	331@K	342@N		1	1091	3	33	0.00054352	0.0663409
Attraction,Attraction,Escape,Reversion,Attraction,Escape	68@I	94@V	30@M,93@D,A31,104@I,58@K	21	11	907	150	0.000543849	0.0663409
Repulsion	275@K	234@G		5	1	0	1138	0.000547954	0.0667655
Repulsion	163@G	147@M		6	45	8	1082	0.000552743	0.0672356
Attraction,Attraction	232@K	1@I	316@*	3	2	3	1136	0.000553069	0.0672356
Reversion,Attraction,Repulsion	332@S	243@P	144@H,7@I	4	6	11	1118	0.000557102	0.067649
Attraction,Repulsion,Attraction,Attraction,Escape	93@K	11@G	9@S,7@I,301@Y,91@G	16	23	721	371	0.000558698	0.0677659
Attraction,Escape,Escape,Repulsion,Escape,Attraction,Escape	121@N	186@T	190@T,B81,177@D,142@M,173@A,256@V	19	4	1052	47	0.000560964	0.0679637
Attraction,Escape,Reversion,Attraction,Attraction,Attraction,Attraction,Repulsion,Reversion,Attraction,Repulsion	182@Q	146@P	B57,C06,211@E,C08,242@N,149@A,176@A,168@V,145@Q,148@A	232	810	3	71	0.00056278	0.0680921
Attraction,Attraction	215@T	119@M	62@Q	4	19	10	1094	0.000563297	0.0680921
Attraction,Reversion	121@G	102@D	12@K	61	19	895	99	0.000564201	0.0681244
Escape,Escape,Attraction,Attraction,Attraction,Repulsion,Reversion	123@G	228@L	252@S,252@G,256@V,223@P,148@A,223@V	8	488	7	53	0.000570984	0.0688656
Repulsion,Attraction,Attraction	312@D	173@T	186@T,256@V	426	95	192	383	0.000572767	0.0690029
Escape,Escape,Attraction,Escape,Attraction,Repulsion	215@L	252@G	250@M,228@L,138@A,248@G,168@V	122	794	17	178	0.000582092	0.0700475
Repulsion,Attraction,Escape	146@A	126@A	95@Q,69@K	0	809	5	284	0.000584493	0.0702573
Escape,Attraction	93@D	15@R	12@K	210	208	235	418	0.000589562	0.0707871
Attraction,Repulsion,Attraction	280@I	159@I	280@V,186@T	6	4	621	468	0.000593065	0.0710686
Escape,Repulsion,Escape,Escape	312@D	173@S	264@K,256@I,267@V	88	433	348	226	0.000593998	0.0710686
Attraction,Repulsion,Escape,Reversion	85@L	34@L	7@I,11@G,12@E	378	722	9	2	0.000594102	0.0710686
Repulsion,Attraction,Escape,Escape	62@N	18@K	11@G,76@R,20@K	21	19	890	185	0.000594563	0.0710686
Escape,Reversion,Escape	280@I	159@V	280@V,186@T	4	6	466	623	0.000597643	0.0712215
Repulsion,Attraction,Repulsion,Reversion	339@P	211@D	146@P,A25,242@T	31	1009	8	86	0.000597678	0.0712215
Attraction,Repulsion,Repulsion	215@L	250@I	252@G,260@E	50	867	3	192	0.000598506	0.0712215
Escape,Reversion,Reversion	215@L	250@M	252@G,260@E	867	50	192	3	0.000598506	0.0712215
Reversion,Attraction,Reversion,Escape,Attraction,Reversion	78@L	67@A	301@Y,75@F,72@S,82@I,A30	674	368	10	2	0.000599501	0.0712606
Repulsion,Attraction	143@I	302@R	B14	3	8	25	1096	0.000600417	0.0712904
Escape,Attraction,Attraction,Escape	163@G	15@K	93@K,90@A,91@N	4	47	340	726	0.000603884	0.0716225
Attraction,Reversion,Repulsion,Reversion,Attraction,Reversion,Escape,Repulsion	248@T	219@Q	228@I,218@V,280@T,223@I,230@D,252@N,228@M	53	26	107	916	0.000608301	0.0720665
Reversion,Reversion,Escape	11@D	247@I	163@G,256@I	3	3	1097	29	0.000609805	0.0721525
Repulsion,Repulsion	224@P	83@V	A11	3	30	1	1103	0.000610376	0.0721525
Escape,Escape,Escape,Repulsion,Attraction,Escape,Escape,Reversion,Escape	11@E	12@E	91@G,91@N,15@Q,72@S,11@K,15@A,54@A,10@G	3	374	341	391	0.000613329	0.0724216
Escape,Escape,Reversion,Escape	119@Q	58@K	90@E,62@N,247@I	0	12	514	570	0.000616932	0.0727666
Reversion,Escape,Escape	182@S	113@Q	112@K,30@Q	20	5	553	549	0.000618536	0.0728755
Escape	248@A	46@I		1	593	10	471	0.000621312	0.073122
Attraction	75@L	88@V		1049	1	70	3	0.000625326	0.0735136
Attraction,Escape,Escape,Repulsion,Escape,Attraction,Escape,Escape	190@I	186@T	190@T,B81,177@D,142@M,173@A,256@V,121@N	0	15	1091	36	0.000627097	0.0736409
Reversion,Attraction	93@G	66@S	86@Y	3	15	14	1075	0.000630216	0.0738957
Escape,Escape,Repulsion,Reversion,Escape	176@A	76@R	75@I,A01,18@K,20@R	0	15	439	643	0.000630649	0.0738957
Attraction,Attraction,Escape,Reversion	104@I	94@V	30@M,93@D,A31	842	159	65	3	0.000631636	0.0739304
Escape,Reversion,Reversion	61@M	20@R	A74,12@K	218	32	826	32	0.000632984	0.0739951
Escape,Repulsion	93@D	90@R	113@K	29	390	14	656	0.000633572	0.0739951
Escape,Escape,Escape,Repulsion,Attraction,Attraction,Escape,Escape	252@H	147@I	B57,B13,A25,163@A,148@A,B15,146@S	48	34	760	259	0.000636612	0.0741325
Repulsion,Attraction	120@T	326@S	301@Y	6	43	122	935	0.000636827	0.0741325
Reversion,Escape	120@T	326@A	301@Y	43	6	935	122	0.000636827	0.0741325
Repulsion	357@S	106@K		9	376	1	729	0.00063963	0.0743779
Escape,Attraction,Attraction,Attraction,Attraction,Attraction	148@T	186@S	190@T,B81,182@S,177@D,147@M	3	4	28	1103	0.000641025	0.0744591
Attraction,Escape,Attraction,Repulsion,Escape,Reversion	78@L	252@N	228@L,219@Q,228@I,173@S,215@I	444	636	10	4	0.000645635	0.0749033
Escape,Attraction,Escape,Repulsion,Repulsion,Attraction,Escape,Escape	242@N	146@A	B57,C06,C08,211@E,176@S,168@I,148@A	67	76	752	218	0.000646249	0.0749033
Escape,Escape,Escape	332@N	331@K	B08,312@E	12	5	1078	31	0.000648198	0.0749246
Attraction,Attraction,Attraction	332@N	331@R	B08,312@E	5	12	31	1078	0.000648198	0.0749246
Attraction,Escape,Reversion,Attraction,Attraction	252@G	168@V	335@K,182@E,260@D,146@P	138	1	945	52	0.000648534	0.0749246
Attraction,Attraction,Attraction,Escape	286@R	147@L	B57,B13,A25	140	578	131	253	0.000650627	0.0750853
Attraction,Escape,Attraction,Attraction	61@M	28@Q	A03,30@M,95@R	42	208	145	695	0.000653724	0.0752936
Attraction,Attraction,Escape,Reversion,Attraction,Escape,Escape	90@N	94@V	30@M,93@D,A31,104@I,58@K,68@I	11	6	921	156	0.00065384	0.0752936
Repulsion	112@Q	117@K		13	535	0	577	0.000657969	0.0756877
Escape,Escape,Attraction,Repulsion,Escape,Attraction	68@I	94@I	30@M,93@D,A31,104@I,58@K	11	22	149	908	0.000660711	0.0759214
Attraction,Attraction,Repulsion,Repulsion,Escape,Repulsion,Attraction,Attraction	292@S	242@N	B57,B58,250@M,182@Q,C06,B57,357@S	4	7	143	979	0.000663821	0.0761969
Attraction	119@M	215@T		4	10	19	1094	0.00066485	0.0762294
Attraction	252@H	114@R		11	65	19	987	0.000665667	0.0762294
Escape,Escape	268@M	273@I	275@K	80	9	1036	1	0.000666954	0.0762294
Attraction,Attraction	268@M	273@V	275@K	9	80	1	1036	0.000666954	0.0762294
Repulsion,Attraction,Repulsion,Attraction,Escape	319@E	20@K	112@Q,A74,12@K,68@V	3	668	42	424	0.000668063	0.0762504
Escape,Escape,Attraction,Repulsion,Escape,Attraction,Attraction	90@N	94@I	30@M,93@D,A31,104@I,58@K,68@I	6	11	155	923	0.000668593	0.0762504
Attraction,Reversion,Reversion,Reversion	7@I	78@L	12@K,34@L,67@A	422	10	658	3	0.000669276	0.0762504
Attraction,Attraction,Reversion,Repulsion,Escape,Escape	75@F	76@K	75@I,A01,18@K,20@R,15@K	2	9	647	438	0.00067216	0.0764975
Escape,Escape	58@R	90@K	301@Y	5	547	156	392	0.00067539	0.0767835
Attraction,Escape,Attraction,Reversion,Escape,Reversion,Reversion,Repulsion,Attraction	268@M	215@L	260@D,252@S,219@Q,310@T,86@W,207@E,250@M,173@S	84	3	822	191	0.00068597	0.0779035
Escape,Attraction,Escape,Repulsion,Repulsion,Attraction,Escape	148@A	146@A	B57,C06,C08,211@E,176@S,168@I	1	19	821	271	0.00068778	0.0779735
Escape,Attraction,Escape,Repulsion,Repulsion,Attraction,Escape,Escape,Repulsion	165@S	146@A	B57,C06,C08,211@E,176@S,168@I,148@A,242@N	796	260	24	34	0.000688336	0.0779735
Reversion	146@P	145@Q		230	5	881	0	0.000688773	0.0779735
Reversion,Escape	332@N	286@K	303@T	3	13	382	714	0.000690034	0.07798
Escape,Escape,Attraction,Repulsion	104@I	94@I	30@M,93@D,A31	158	844	3	65	0.000690751	0.07798
Escape,Escape,Attraction,Reversion	253@N	62@Q	126@S,65@H,75@F	114	1020	3	2	0.000691018	0.07798
Attraction	65@Q	52@E		1011	0	120	4	0.000697536	0.0786327
Escape,Attraction,Reversion	62@K	112@K	113@Q,343@I	1	262	547	302	0.000700386	0.0788009
Escape,Repulsion	248@A	228@V	219@H	8	593	0	516	0.000700502	0.0788009
Attraction,Attraction	90@A	126@V	127@S	4	100	8	1012	0.000701886	0.0788043
Escape,Escape,Escape,Repulsion,Attraction,Escape,Escape,Reversion,Escape,Escape,Reversion	11@G	12@E	91@G,91@N,15@Q,72@S,11@K,15@A,54@A,10@G,11@E,90@E	335	377	8	388	0.000702268	0.0788043
Reversion,Repulsion	58@R	64@L	62@N	550	2	531	20	0.000702741	0.0788043
Reversion,Attraction,Escape,Attraction,Repulsion	115@T	203@D	301@Y,312@D,207@D,332@S	483	18	90	519	0.00070627	0.0789623
Repulsion,Escape,Attraction,Escape,Reversion	115@T	203@E	301@Y,312@D,207@D,332@S	18	483	519	90	0.00070627	0.0789623
Repulsion,Escape,Escape	15@T	91@N	12@K,15@A	7	127	83	905	0.000706365	0.0789623
Attraction,Repulsion,Attraction,Attraction	91@G	11@G	9@S,7@I,301@Y	92	36	638	360	0.000708758	0.0791471
Reversion,Attraction,Escape	207@D	203@D	301@Y,312@D	48	13	539	538	0.0007117	0.0792969
Repulsion,Escape,Attraction	207@D	203@E	301@Y,312@D	13	48	538	539	0.0007117	0.0792969
Repulsion	252@S	65@R		6	388	0	721	0.000712323	0.0792969
Attraction	223@L	28@T		3	2	30	1097	0.000716979	0.0796504
Attraction,Reversion,Attraction,Escape	223@V	224@P	223@N,225@P,223@H	0	349	33	700	0.000717147	0.0796504
Escape,Attraction,Attraction,Escape,Reversion,Attraction,Attraction,Attraction	61@M	15@K	93@K,90@A,91@N,163@G,226@G,91@D,91@G	122	127	218	623	0.000717732	0.0796504
Repulsion	88@V	75@L		1049	70	1	3	0.000721206	0.0798229
Attraction,Repulsion	335@K	339@T	309@S	17	627	5	491	0.000721255	0.0798229
Reversion,Escape	173@S	267@V	163@A	0	461	21	638	0.000721525	0.0798229
Escape,Attraction	62@T	9@K	301@Y	10	28	66	1030	0.000726765	0.0803196
Reversion,Escape	143@I	302@K	B14	8	3	1095	26	0.000728334	0.0804098
Escape,Repulsion,Escape	219@Q	126@E	9@S,127@K	6	153	105	821	0.000731088	0.0806307
Repulsion	102@E	67@T		3	116	1	981	0.000733042	0.0807629
Escape,Escape,Repulsion	93@E	49@G	20@K,65@H	560	9	490	26	0.000734572	0.0808082
Repulsion,Reversion,Repulsion	99@E	109@N	112@K,90@A	1046	72	1	3	0.000734963	0.0808082
Escape,Reversion,Escape,Reversion,Repulsion,Attraction,Escape	267@V	268@L	264@K,203@E,B27,215@L,273@I,146@P	14	7	1010	95	0.000736011	0.0808404
Repulsion,Escape,Reversion,Reversion,Escape,Reversion,Attraction	4@S	252@S	250@M,228@L,148@S,215@L,256@V,256@I	18	3	374	716	0.000736903	0.0808553
Escape,Attraction,Escape,Repulsion,Repulsion,Attraction,Escape,Escape,Repulsion,Repulsion	149@P	146@A	B57,C06,C08,211@E,176@S,168@I,148@A,242@N,165@S	821	290	1	4	0.000738787	0.0809789
Attraction	62@Q	75@F		6	111	6	1012	0.000748519	0.0818944
Attraction,Escape,Attraction,Escape,Attraction,Escape	303@V	93@D	15@R,94@I,B40,122@K,B41	10	56	413	620	0.00074867	0.0818944
Repulsion,Attraction,Reversion,Escape,Escape,Attraction,Escape	243@P	163@A	165@S,168@I,310@T,B57,191@I,B81	10	5	1065	63	0.000750038	0.0819603
Reversion,Attraction	7@I	243@P	144@H	10	423	5	659	0.000753836	0.0822571
Repulsion	126@S	127@Q		360	66	87	569	0.000755306	0.0822571
Attraction,Attraction,Reversion	18@K	76@K	75@I,A01	478	390	158	45	0.000755548	0.0822571
Escape,Escape	11@E	91@G	12@E	29	348	99	651	0.000755831	0.0822571
Attraction,Reversion,Reversion	67@A	78@L	12@K,34@L	674	10	368	2	0.00075752	0.0823572
Repulsion,Repulsion,Repulsion	136@Q	286@R	303@T,309@A	726	378	2	7	0.000758452	0.0823748
Reversion,Escape,Repulsion	48@P	326@A	301@Y,120@T	980	115	8	14	0.000763394	0.082665
Repulsion,Attraction,Reversion	48@P	326@S	301@Y,120@T	115	980	14	8	0.000763394	0.082665
Attraction,Escape,Attraction,Attraction,Attraction,Repulsion,Attraction	93@N	28@Q	A03,30@M,95@R,61@M,C17,91@R	3	5	193	912	0.000763442	0.082665
Escape,Reversion	215@L	207@E	A34	857	59	191	4	0.000767464	0.0829737
Attraction,Attraction,Attraction,Repulsion,Attraction,Reversion,Escape	173@S	336@G	332@I,339@Q,332@V,310@T,312@E,339@P	1	459	74	585	0.000769112	0.0829737
Repulsion,Repulsion,Escape	339@T	335@R	339@P,331@K	5	17	491	627	0.000769395	0.0829737
Reversion,Reversion,Attraction	339@T	335@K	339@P,331@K	17	5	627	491	0.000769395	0.0829737
Attraction,Attraction,Escape	15@K	93@K	15@E,95@Q	2	341	37	733	0.000776244	0.0836279
Attraction,Reversion,Repulsion,Reversion,Attraction,Reversion,Escape,Repulsion,Escape	75@I	219@Q	228@I,218@V,280@T,223@I,230@D,252@N,228@M,248@T	2	51	153	882	0.000777457	0.0836743
Repulsion,Reversion,Escape	219@Q	223@N	224@P,61@L	1	160	24	918	0.000778544	0.0837072
Attraction,Escape,Reversion,Reversion,Attraction	292@S	312@E	B44,303@V,331@K,315@N	9	2	572	525	0.000779811	0.0837569
Attraction,Escape,Attraction,Reversion,Escape,Reversion	207@E	215@L	260@D,252@S,219@Q,310@T,86@W	857	191	59	4	0.000780572	0.0837569
Attraction,Escape,Escape,Reversion,Reversion	81@T	228@I	248@T,219@H,248@G,83@A	102	974	9	26	0.000788328	0.0845043
Reversion,Attraction,Reversion,Escape,Attraction,Reversion,Attraction	48@A	67@A	301@Y,75@F,72@S,82@I,A30,78@L	8	2	675	369	0.000789552	0.0845508
Repulsion	72@T	116@K		13	542	0	572	0.000795658	0.0851195
Escape,Attraction,Escape,Repulsion,Repulsion,Attraction,Escape,Escape,Repulsion,Repulsion,Repulsion	145@Q	146@A	B57,C06,C08,211@E,176@S,168@I,148@A,242@N,165@S,149@P	822	289	0	5	0.000800422	0.0855436
Repulsion,Reversion,Attraction,Escape	146@P	339@Q	336@G,83@A,30@M	3	231	28	850	0.000810088	0.0864902
Repulsion	34@L	38@G		7	381	1	721	0.000812512	0.0866626
Repulsion	82@V	51@L		925	1	143	4	0.000813551	0.0866869
Escape,Escape,Escape,Escape,Escape,Repulsion,Reversion,Escape,Attraction,Escape	248@T	219@H	228@I,230@D,218@A,218@P,228@V,223@I,310@S,121@G,252@N	24	55	905	114	0.0008215	0.0872787
Repulsion,Escape,Escape	138@S	84@T	82@V,B51	2	4	815	301	0.000822147	0.0872787
Attraction,Escape,Escape	168@V	182@E	B81,177@E	2	1085	5	48	0.000822745	0.0872787
Escape,Escape	310@S	122@G	123@G	0	494	6	106	0.000823142	0.0872787
Escape	61@L	339@A		0	560	11	537	0.000823554	0.0872787
Attraction,Repulsion,Reversion,Attraction,Escape,Escape,Attraction	332@I	339@P	340@A,336@A,335@K,113@K,303@A,31@M	25	8	1019	86	0.000824	0.0872787
Repulsion	165@N	62@T		9	46	29	1052	0.000833975	0.0882479
Repulsion,Attraction,Reversion,Escape,Escape,Attraction,Attraction,Repulsion,Repulsion,Repulsion	124@D	7@I	11@G,34@L,4@R,9@S,130@H,112@Q,30@M,91@K,94@V	3	5	55	461	0.000836985	0.0884789
Repulsion,Repulsion,Escape,Attraction,Repulsion,Attraction	138@M	303@V	340@A,312@D,A23,125@K,286@K	5	53	61	1007	0.000839567	0.0886642
Reversion,Escape,Reversion	136@Q	286@K	303@T,332@N	375	729	7	2	0.000849294	0.089603
Attraction,Escape,Repulsion,Escape,Reversion,Repulsion,Escape	62@G	72@T	12@K,62@E,65@Q,301@Y,76@K,46@L	9	346	556	165	0.000856826	0.0903086
Attraction,Attraction,Escape	122@T	143@I	182@H,138@A	0	455	5	137	0.000860549	0.0906117
Escape,Attraction,Escape,Repulsion,Escape	315@G	312@D	B44,303@V,309@S,331@K	1	6	524	580	0.000863903	0.0908754
Escape,Escape,Repulsion,Attraction,Repulsion	48@P	61@I	301@Y,62@N,59@Q,91@G	289	798	0	23	0.00087192	0.0916287
Escape,Attraction,Escape,Escape,Repulsion,Escape,Repulsion	86@Y	28@H	C17,30@M,31@I,182@T,30@M,18@K	308	806	1	19	0.000873171	0.0916701
Attraction,Escape,Attraction,Escape	90@A	54@S	90@E,62@N,B57	59	46	802	186	0.000875743	0.0917717
Attraction,Escape,Attraction,Reversion,Escape,Reversion,Reversion	250@M	215@L	260@D,252@S,219@Q,310@T,86@W,207@E	867	192	50	3	0.000875854	0.0917717
Attraction,Escape,Reversion,Attraction,Escape,Repulsion,Attraction,Reversion,Escape,Reversion,Escape,Escape	28@R	303@T	286@R,339@T,323@V,340@G,46@L,339@P,15@T,34@L,125@K,312@D,138@M	98	19	923	77	0.000879168	0.0920287
Repulsion	142@M	148@S		1088	24	14	3	0.000880077	0.0920338
Repulsion	30@M	122@D		5	39	0	589	0.000896737	0.0936845
Reversion,Attraction,Escape,Attraction	332@S	203@D	301@Y,312@D,207@D	9	1	575	553	0.00089979	0.0938202
Repulsion,Escape,Attraction,Escape	332@S	203@E	301@Y,312@D,207@D	1	9	553	575	0.00089979	0.0938202
Escape,Escape,Repulsion,Reversion,Escape,Escape	58@Q	76@R	75@I,A01,18@K,20@R,176@A	1	14	439	647	0.000901516	0.0939087
Repulsion,Repulsion,Repulsion	118@A	31@I	28@R,72@T	57	961	1	81	0.000904582	0.0941363
Reversion,Reversion,Escape,Escape,Attraction	260@D	211@E	146@P,242@T,A25,280@A	434	6	655	36	0.000907357	0.0942599
Repulsion,Attraction,Repulsion,Reversion,Attraction	280@A	211@D	146@P,A25,242@T,339@P	4	8	32	1084	0.000907532	0.0942599
Reversion,Repulsion	95@R	332@N	331@K	15	576	1	504	0.000910811	0.0945088
Repulsion,Repulsion,Repulsion,Escape	147@L	286@R	303@T,309@A,136@Q	140	131	578	253	0.000915741	0.0948597
Repulsion	123@A	223@A		3	6	9	553	0.000917309	0.0948597
Repulsion,Attraction,Reversion	16@W	127@Q	126@S,106@K	461	635	4	5	0.00091743	0.0948597
Escape,Attraction,Attraction,Escape,Reversion	226@G	15@K	93@K,90@A,91@N,163@G	337	773	7	0	0.000917739	0.0948597
Reversion	144@H	243@P		12	1122	3	2	0.000921336	0.0951395
Attraction,Escape,Attraction,Reversion,Escape,Reversion,Reversion,Repulsion	173@S	215@L	260@D,252@S,219@Q,310@T,86@W,207@E,250@M	396	45	511	145	0.000927323	0.0956654
Escape,Escape,Escape,Escape,Escape,Repulsion,Reversion,Escape	121@G	219@H	228@I,230@D,218@A,218@P,228@V,223@I,310@S	55	21	846	141	0.000936108	0.0964786
Escape,Escape,Escape,Escape,Escape,Repulsion,Reversion,Escape,Attraction,Escape,Escape	148@A	219@H	228@I,230@D,218@A,218@P,228@V,223@I,310@S,121@G,252@N,248@T	9	10	917	158	0.000949181	0.0977319
Escape,Attraction,Reversion,Attraction,Attraction	125@K	357@S	B07,362@I,43@R,A11	10	5	102	422	0.000955101	0.0982468
Reversion	90@E	187@M		240	4	893	0	0.000963078	0.0989722
Escape	362@I	361@R		59	3	1049	2	0.000964413	0.0990143
Escape,Attraction,Escape,Repulsion,Escape,Escape	292@S	312@D	B44,303@V,309@S,331@K,315@G	2	9	524	574	0.000966946	0.0991034
Attraction,Escape,Repulsion,Escape,Escape	125@K	357@G	B07,362@I,43@R,A11	5	10	419	104	0.000967133	0.0991034
Attraction,Repulsion	127@S	138@S	182@H	4	5	1	1116	0.000969373	0.0992378
Repulsion,Escape	54@S	226@N	256@V	1	862	5	228	0.000974657	0.0996834
Escape	215@L	138@H		3	914	7	187	0.000975896	0.0997148
Reversion,Reversion,Escape	121@A	116@Q	72@T,228@M	48	7	1044	17	0.00098168	0.10021
Escape,Escape,Reversion,Escape,Attraction	61@M	58@K	90@E,62@N,247@I,119@Q	210	40	310	528	0.000987856	0.100744
Reversion,Escape	339@Q	83@A	228@I	27	3	1101	4	0.000993152	0.101177
Reversion,Reversion	228@M	116@Q	72@T	890	25	190	0	0.000993986	0.101177
Attraction,Escape,Reversion,Attraction,Escape,Repulsion,Attraction,Reversion	34@L	303@T	286@R,339@T,323@V,340@G,46@L,339@P,15@T	316	72	700	23	0.000996554	0.101342
Repulsion,Attraction	128@I	120@D	256@V	5	36	14	1062	0.00100135	0.101733
Repulsion	95@Q	126@A		4	42	1	1077	0.00100391	0.101896
Attraction,Escape,Reversion	256@I	173@A	264@K,256@V	30	795	2	310	0.00100847	0.102261
Attraction	122@K	62@R		10	42	22	522	0.00100945	0.102264
Escape,Repulsion,Escape,Escape,Attraction,Attraction	28@H	182@Q	B81,256@I,121@E,143@I,242@N	286	24	779	50	0.00101209	0.102434
Attraction,Reversion	109@N	114@N	15@Q	5	1038	3	72	0.00101637	0.10277
Attraction,Escape	215@T	120@A	123@G	19	4	1017	82	0.00102517	0.103563
Escape,Attraction,Escape,Escape	301@Y	30@M	28@Q,61@M,C17	0	555	437	147	0.00103279	0.104147
Repulsion,Repulsion	7@I	115@M	111@I	9	416	0	655	0.00103366	0.104147
Reversion,Escape,Reversion,Reversion	252@S	4@R	111@I,11@E,7@I	374	18	715	4	0.00103388	0.104147
Repulsion,Escape,Attraction	60@L	82@I	84@V,67@A	6	11	133	923	0.00103523	0.104185
Escape,Escape,Attraction,Attraction,Attraction,Repulsion,Repulsion,Repulsion	143@V	228@M	248@T,219@Q,252@S,248@G,252@G,253@N,81@T	909	184	10	8	0.00103842	0.104391
Repulsion,Attraction,Reversion,Escape,Escape,Attraction,Attraction	30@M	7@I	11@G,34@L,4@R,9@S,130@H,112@Q	299	137	134	527	0.00103923	0.104391
Attraction,Attraction,Reversion,Repulsion,Escape,Escape,Escape	49@D	76@K	75@I,A01,18@K,20@R,15@K,75@F	2	11	647	436	0.00104515	0.104827
Reversion	186@T	343@I		5	1084	3	47	0.00104553	0.104827
Escape,Attraction,Attraction,Escape	39@K	65@Q	62@K,79@F,46@V	12	10	997	114	0.00104793	0.10497
Reversion	228@L	253@N		69	3	1063	2	0.00105306	0.105165
Repulsion	228@L	253@T		3	69	2	1063	0.00105306	0.105165
Escape,Reversion,Reversion,Escape	76@R	20@R	A74,12@K,61@M	395	41	636	24	0.0010531	0.105165
Repulsion,Attraction,Attraction	20@K	95@L	215@V,B58	3	42	3	1088	0.00105381	0.105165
Escape,Attraction	39@K	28@C	9@S	8	14	41	1075	0.00106141	0.105737
Attraction,Repulsion	147@L	163@N	191@I	8	270	4	845	0.00106197	0.105737
Attraction,Attraction,Reversion,Repulsion,Escape,Escape,Escape,Reversion,Escape	30@R	76@K	75@I,A01,18@K,20@R,15@K,75@F,49@D,4@R	155	144	485	281	0.00106304	0.105737
Escape,Escape,Escape,Repulsion,Attraction,Attraction,Escape,Escape,Reversion,Escape	243@P	147@I	B57,B13,A25,163@A,148@A,B15,146@S,252@H,117@Q	4	11	823	287	0.0010635	0.105737
Escape,Escape,Attraction,Attraction,Attraction	148@A	228@L	252@S,252@G,256@V,223@P	6	11	65	1050	0.00106666	0.105952
Escape,Escape,Attraction,Attraction,Attraction,Repulsion,Repulsion,Repulsion,Reversion	186@T	228@M	248@T,219@Q,252@S,248@G,252@G,253@N,81@T,143@V	878	188	45	5	0.00106908	0.106094
Attraction,Escape,Attraction	219@Q	215@L	260@D,252@S	145	14	739	179	0.00107096	0.106101
Attraction,Attraction,Escape,Repulsion	247@I	58@R	90@E,15@K,61@M	551	521	0	33	0.00107113	0.106101
Repulsion,Attraction,Attraction,Attraction,Attraction,Escape	35@I	30@R	9@S,A24,B42,14@E,34@V	1	61	311	723	0.00108087	0.106871
Escape,Escape	15@T	74@E	62@N	131	3	998	4	0.0010809	0.106871
Repulsion,Reversion	339@P	110@K	109@N	986	42	89	0	0.00108484	0.107162
Attraction,Attraction	91@N	104@L	138@A	3	89	5	1028	0.00108971	0.107496
Attraction,Repulsion,Repulsion	260@E	207@D	A34,215@L	32	657	29	411	0.00109024	0.107496
Escape,Attraction	65@H	39@K	35@V	10	101	12	1010	0.00110198	0.108477
Attraction,Repulsion	215@L	207@D	A34	57	859	4	191	0.00110299	0.108477
Attraction,Attraction,Escape,Escape,Attraction	95@L	93@K	15@E,95@Q,15@K,15@R	3	3	36	1098	0.00110323	0.108477
Escape,Attraction	127@P	126@N	113@Q	8	23	39	1026	0.00110425	0.108478
Attraction	11@G	45@A		725	0	391	6	0.00111005	0.108837
Escape	11@G	45@S		0	725	6	391	0.00111005	0.108837
Repulsion,Attraction,Attraction	61@M	20@S	28@R,A74	8	242	3	856	0.00111095	0.108837
Escape,Escape,Escape	62@K	90@K	301@Y,58@R	43	221	119	735	0.00111423	0.109058
Attraction,Escape,Reversion,Attraction,Attraction,Attraction,Attraction,Repulsion,Reversion,Attraction,Repulsion,Attraction	30@H	146@P	B57,C06,211@E,C08,242@N,149@A,176@A,168@V,145@Q,148@A,182@Q	4	0	229	878	0.00111893	0.109355
Attraction,Attraction,Attraction	31@I	119@M	62@Q,215@T	6	54	8	1054	0.00111931	0.109355
Attraction,Repulsion,Reversion,Attraction,Escape,Escape,Attraction,Reversion,Repulsion,Attraction	93@D	339@P	340@A,336@A,335@K,113@K,303@A,31@M,332@I,110@K,107@E	397	23	604	69	0.0011239	0.109683
Repulsion,Attraction,Attraction,Attraction,Attraction,Reversion,Escape	121@D	62@E	72@S,55@G,69@K,B57,69@R,79@Y	54	823	29	155	0.00112471	0.109683
Attraction,Attraction,Attraction,Repulsion,Attraction	62@A	119@M	62@Q,215@T,31@I,223@N	3	23	11	1081	0.00113308	0.110352
Attraction,Attraction,Reversion,Repulsion,Escape,Escape,Escape,Reversion,Escape,Attraction	58@Q	76@K	75@I,A01,18@K,20@R,15@K,75@F,49@D,4@R,30@R	14	1	635	447	0.00113364	0.110352
Escape	339@P	119@T		20	1001	12	79	0.00113715	0.110593
Reversion,Reversion,Attraction,Attraction,Reversion,Attraction,Escape,Repulsion	190@T	256@I	248@A,247@I,223@N,207@D,186@T,146@P,215@I	809	300	17	12	0.00113989	0.110759
Attraction,Repulsion	11@G	75@F	62@Q	11	723	1	395	0.00114888	0.111531
Reversion	331@K	332@N		12	1078	5	31	0.00115551	0.112073
Reversion	190@T	93@A		6	1102	3	26	0.00116366	0.112761
Repulsion,Attraction,Escape	126@K	113@K	112@K,58@R	8	20	487	575	0.00117142	0.113407
Attraction,Attraction,Escape,Attraction,Escape	62@T	82@V	84@T,67@A,60@L,18@R	30	8	893	140	0.00117245	0.113407
Attraction,Repulsion,Escape,Attraction	53@S	118@T	126@R,91@K,B07	4	17	39	1045	0.00118071	0.114103
Repulsion,Repulsion	84@V	127@N	126@G	5	293	6	806	0.00118398	0.114211
Repulsion	90@A	54@L		5	100	4	1031	0.00118429	0.114211
Reversion,Repulsion,Reversion,Attraction,Attraction,Repulsion,Reversion	95@K	91@K	12@K,124@K,10@G,A31,147@L,124@N	152	260	306	339	0.00118511	0.114211
Escape,Attraction,Attraction,Escape,Escape,Escape,Escape,Attraction,Repulsion	78@L	28@K	A03,67@S,30@R,A30,12@Q,95@R,122@K,B15	356	728	6	8	0.00118609	0.114211
Attraction,Repulsion,Reversion,Attraction,Escape,Escape,Attraction,Reversion,Repulsion,Attraction,Escape	323@I	339@P	340@A,336@A,335@K,113@K,303@A,31@M,332@I,110@K,107@E,93@D	18	12	1019	82	0.00119737	0.115114
Reversion,Attraction,Reversion,Repulsion,Attraction,Attraction,Attraction	228@V	260@E	215@L,B35,250@M,136@Q,207@D,147@L	7	1	684	440	0.00119763	0.115114
Repulsion,Attraction	69@K	126@A	95@Q	4	78	1	1024	0.001199	0.115143
Repulsion,Attraction	12@K	132@Y	136@Q	639	10	435	22	0.00120916	0.116015
Reversion,Escape,Reversion,Reversion,Escape	18@K	4@R	111@I,11@E,7@I,252@S	891	20	202	2	0.00121047	0.116036
Repulsion,Attraction	223@N	15@E	93@K	3	23	8	1103	0.00121425	0.116295
Attraction,Attraction,Escape,Repulsion,Repulsion	69@Q	58@R	90@E,15@K,61@M,247@I	501	465	29	87	0.00121973	0.116714
Escape,Escape,Attraction,Attraction,Attraction,Repulsion	223@V	228@L	252@S,252@G,256@V,223@P,148@A	34	312	34	701	0.00122489	0.117103
Attraction,Escape,Attraction,Escape	122@K	93@D	15@R,94@I,B40	6	46	199	339	0.00123027	0.117498
Repulsion,Attraction	106@K	127@Q	126@S	4	6	463	638	0.00123122	0.117498
Reversion,Escape	30@Q	113@Q	112@K	21	40	548	492	0.00123685	0.117748
Escape,Escape	177@D	190@T	186@S	9	4	1104	25	0.00123693	0.117748
Attraction,Escape,Attraction,Repulsion,Escape,Reversion,Attraction	138@M	252@N	228@L,219@Q,228@I,173@S,215@I,78@L	42	12	402	624	0.00123713	0.117748
Attraction,Escape,Reversion,Repulsion	312@E	173@A	264@K,256@V,256@I	32	552	3	524	0.00124185	0.118092
Attraction	69@K	125@S		12	0	357	142	0.00125377	0.11896
Attraction,Attraction,Repulsion,Repulsion,Escape,Repulsion,Attraction,Attraction,Repulsion,Escape	90@E	242@N	B57,B58,250@M,182@Q,C06,B57,357@S,292@S,117@Q	34	210	114	775	0.00125431	0.11896
Repulsion	90@E	55@A		14	230	11	870	0.00125432	0.11896
Escape,Attraction,Escape,Escape,Escape,Escape	163@G	93@E	B40,94@I,15@E,B41,91@R	13	37	563	484	0.00125713	0.119121
Reversion	30@M	134@I		426	7	699	0	0.00127917	0.121102
Escape,Escape,Escape,Reversion	111@S	331@K	B08,312@E,332@N	885	34	176	0	0.00128578	0.121486
Attraction,Attraction,Attraction,Repulsion	111@S	331@R	B08,312@E,332@N	34	885	0	176	0.00128578	0.121486
Reversion	82@I	50@L		136	3	933	1	0.00128663	0.121486
Escape,Escape,Escape,Attraction	81@A	248@G	242@N,228@I,256@V	16	10	392	689	0.00129064	0.121758
Repulsion,Attraction,Repulsion,Attraction,Escape,Reversion	165@S	20@K	112@Q,A74,12@K,68@V,319@E	31	1047	14	44	0.00129359	0.121795
Attraction,Escape,Escape,Escape	121@S	120@A	123@G,215@T,86@F	2	4	1028	81	0.00129392	0.121795
Reversion,Repulsion,Reversion,Attraction,Attraction,Repulsion	124@N	91@K	12@K,124@K,10@G,A31,147@L	176	230	28	56	0.00129445	0.121795
Repulsion,Escape,Escape,Repulsion	186@T	138@L	200@M,182@H,122@P	880	188	40	10	0.00130152	0.122352
Escape,Escape,Repulsion,Attraction,Repulsion,Attraction	104@L	61@I	301@Y,62@N,59@Q,91@G,48@P	6	2	279	826	0.00130513	0.122584
Repulsion	12@E	280@S		6	336	1	765	0.00130931	0.122869
Escape,Escape,Escape	123@A	124@N	121@A,125@C	0	8	444	82	0.00131988	0.123752
Repulsion,Repulsion,Reversion	107@E	90@E	54@S,62@K	237	879	7	11	0.00132581	0.124199
Reversion	49@G	48@S		4	1088	3	32	0.00134189	0.125595
Escape,Escape,Reversion,Reversion,Attraction,Reversion,Escape,Escape	292@S	242@T	B57,B58,250@M,182@Q,C06,B57,159@I	7	4	963	157	0.0013478	0.126038
Repulsion,Reversion,Repulsion,Escape	223@P	109@N	112@K,90@A,99@E	5	6	1051	69	0.0013537	0.12648
Attraction,Repulsion,Escape,Reversion,Attraction,Attraction,Attraction	30@R	34@L	7@I,11@G,12@E,85@L,78@V,339@S	98	201	289	492	0.0013637	0.127302
Repulsion,Escape,Attraction,Escape,Attraction,Attraction	62@T	82@I	84@V,67@A,60@L,91@K,76@T	8	30	131	902	0.00136835	0.127574
Attraction,Attraction,Reversion,Repulsion,Escape,Escape,Escape,Reversion	4@R	76@K	75@I,A01,18@K,20@R,15@K,75@F,49@D	631	441	18	3	0.001369	0.127574
Reversion,Repulsion,Reversion,Escape,Escape,Reversion,Attraction	326@S	340@G	319@E,303@T,339@P,342@S,C03,336@A	28	95	541	433	0.00137123	0.127672
Attraction,Reversion	107@E	91@Q	28@C	17	1104	3	15	0.00137437	0.127852
Attraction,Escape,Escape	339@Q	323@V	280@T,322@M	25	6	1070	31	0.00137886	0.128158
Repulsion,Escape,Reversion	138@L	215@I	256@V,252@N	20	899	9	189	0.00138168	0.128309
Attraction,Escape,Attraction,Escape,Escape	79@H	54@S	90@E,62@N,B57,90@A	5	7	856	224	0.00138542	0.128505
Attraction,Escape,Escape,Repulsion,Escape,Attraction	256@V	186@T	190@T,B81,177@D,142@M,173@A	291	11	799	40	0.00138722	0.128505
Repulsion,Repulsion	146@P	30@H	A24	4	229	0	878	0.00138739	0.128505
Escape,Escape,Repulsion,Reversion,Escape,Escape,Repulsion	4@R	76@R	75@I,A01,18@K,20@R,176@A,58@Q	433	643	3	18	0.00139085	0.128708
Escape,Escape,Escape,Repulsion,Attraction,Escape,Escape,Reversion	10@G	12@E	91@G,91@N,15@Q,72@S,11@K,15@A,54@A	315	763	27	4	0.00139199	0.128708
Repulsion,Repulsion,Escape,Attraction	125@K	303@V	340@A,312@D,A23	4	11	12	532	0.00139569	0.128938
Repulsion,Attraction,Attraction,Attraction,Attraction	69@R	62@E	72@S,55@G,69@K,B57	3	5	85	1006	0.00139815	0.129055
Reversion,Repulsion,Reversion,Escape,Escape,Reversion	336@A	340@G	319@E,303@T,339@P,342@S,C03	493	542	78	0	0.00140573	0.129587
Attraction,Repulsion,Reversion,Attraction,Escape,Escape,Attraction,Reversion	110@K	339@P	340@A,336@A,335@K,113@K,303@A,31@M,332@I	986	89	42	0	0.00140634	0.129587
Escape,Escape,Repulsion,Attraction	163@G	15@T	9@S,11@E,303@T	26	25	109	977	0.00141278	0.130039
Escape,Attraction,Escape,Escape,Escape,Escape,Attraction	303@C	93@E	B40,94@I,15@E,B41,91@R,163@G	10	1	566	520	0.00141368	0.130039
Attraction,Repulsion,Reversion,Attraction,Escape,Escape,Attraction,Reversion,Repulsion	107@E	339@P	340@A,336@A,335@K,113@K,303@A,31@M,332@I,110@K	1034	83	8	8	0.00142054	0.130499
Repulsion,Escape,Reversion	173@T	49@D	76@R,46@V	8	610	5	499	0.00142276	0.130499
Escape,Escape	65@H	49@G	20@K	100	11	988	24	0.00142425	0.130499
Reversion,Escape,Escape,Attraction,Escape,Repulsion,Escape,Attraction	326@S	69@Q	12@K,62@E,61@I,62@K,B13,101@L,126@A	121	3	860	111	0.0014246	0.130499
Repulsion,Repulsion,Attraction	173@S	218@P	219@Q,248@T	10	445	6	655	0.00142478	0.130499
Escape,Reversion,Repulsion	335@K	310@S	10@A,309@A	495	122	9	487	0.00143163	0.131015
Attraction	61@I	59@Q		287	0	801	13	0.00143622	0.131315
Attraction,Attraction,Escape,Attraction,Escape,Escape	76@T	82@V	84@T,67@A,60@L,18@R,62@T	2	3	924	145	0.00143737	0.131315
Attraction,Attraction,Escape,Escape	91@K	28@R	20@S,31@I,A24	31	432	83	524	0.00143937	0.131383
Repulsion	342@S	127@T		6	160	2	953	0.00144116	0.131383
Attraction,Escape,Reversion,Attraction,Escape,Repulsion,Attraction	15@T	303@T	286@R,339@T,323@V,340@G,46@L,339@P	127	7	912	89	0.00144179	0.131383
Repulsion,Reversion,Repulsion	267@V	55@G	62@E,B58	3	18	46	1044	0.00144491	0.131554
Attraction,Reversion,Reversion,Escape,Reversion	326@S	362@V	357@G,115@A,286@R,B07	89	35	947	30	0.00145209	0.132096
Escape,Reversion,Reversion	260@E	207@E	A34,215@L	657	32	409	31	0.00145659	0.132369
Attraction,Attraction,Attraction,Escape,Escape,Escape,Attraction	146@S	147@L	B57,B13,A25,286@R,309@S,148@A	17	8	257	838	0.00145757	0.132369
Reversion,Escape,Attraction,Attraction	62@N	18@R	11@G,76@R,20@K	18	22	177	898	0.00146991	0.133377
Attraction,Escape,Attraction,Reversion,Escape,Reversion,Reversion,Repulsion,Attraction,Escape	343@I	215@L	260@D,252@S,219@Q,310@T,86@W,207@E,250@M,173@S,268@M	3	5	917	187	0.00147249	0.133497
Escape,Escape	123@N	122@T	121@A	0	4	457	87	0.00149209	0.13516
Reversion,Repulsion,Reversion,Attraction,Attraction,Repulsion,Reversion,Attraction	218@A	91@K	12@K,124@K,10@G,A31,147@L,124@N,95@K	19	12	450	599	0.00149802	0.135511
Attraction,Attraction,Escape,Reversion,Attraction,Reversion,Reversion,Attraction	91@Q	12@K	91@N,91@G,A74,20@R,15@Q,72@S,69@Q	19	1	634	467	0.0014985	0.135511
Attraction,Attraction	121@G	125@S	69@K	53	5	314	128	0.00151655	0.137028
Attraction,Reversion,Attraction,Escape,Attraction	11@K	224@P	223@N,225@P,223@H,223@V	3	9	29	1095	0.00152164	0.13732
Attraction,Escape,Attraction,Attraction,Attraction,Repulsion,Attraction,Reversion	331@K	28@Q	A03,30@M,95@R,61@M,C17,91@R,93@N	184	884	9	26	0.00152236	0.13732
Attraction,Repulsion,Attraction,Attraction,Escape,Escape	123@D	11@G	9@S,7@I,301@Y,91@G,93@K	0	4	561	11	0.00152589	0.137523
Repulsion,Repulsion,Attraction	146@T	62@T	165@N,76@K	3	9	35	1084	0.00152782	0.137581
Attraction,Escape,Reversion,Attraction,Escape,Repulsion,Attraction,Reversion,Escape,Reversion	312@D	303@T	286@R,339@T,323@V,340@G,46@L,339@P,15@T,34@L,125@K	450	75	568	19	0.00152943	0.13761
Repulsion,Attraction,Repulsion,Attraction	95@L	215@V	268@L,252@S,260@E	4	2	98	1012	0.00153171	0.137699
Escape,Reversion,Attraction,Escape,Escape,Escape	339@S	34@I	7@I,11@G,12@E,30@R,78@V	6	20	688	381	0.00153452	0.137729
Escape,Escape,Repulsion	303@T	15@T	9@S,11@E	127	912	7	89	0.00153462	0.137729
Repulsion,Attraction,Reversion,Attraction	76@R	75@L	88@V,219@Q,79@Y	423	14	594	56	0.00153771	0.137841
Escape	95@R	12@A		0	589	7	501	0.00153844	0.137841
Escape,Attraction,Attraction,Repulsion	46@V	66@P	224@P,C07,67@A	465	5	599	13	0.00154276	0.138112
Escape,Escape,Attraction	109@K	309@S	312@D,286@R	4	41	24	1066	0.00154726	0.138399
Repulsion,Attraction,Repulsion	309@S	64@I	62@N,186@M	3	25	14	1096	0.00156172	0.139576
Attraction,Attraction,Attraction,Repulsion	223@N	119@M	62@Q,215@T,31@I	3	23	11	1088	0.00156561	0.139808
Repulsion,Attraction,Escape,Escape,Repulsion	117@Q	18@K	11@G,76@R,20@K,62@N	866	186	29	13	0.00156739	0.13985
Repulsion	252@S	256@M		5	388	0	722	0.00157026	0.139988
Attraction,Attraction	123@D	122@A	121@A	4	0	51	500	0.0015762	0.140401
Repulsion	109@N	110@K		1011	31	64	11	0.00158032	0.140603
Reversion,Attraction,Reversion,Repulsion,Attraction,Attraction	147@L	260@E	215@L,B35,250@M,136@Q,207@D	166	111	512	329	0.0015811	0.140603
Attraction,Attraction	126@K	119@E	30@M	4	24	40	1036	0.00159166	0.141425
Attraction,Repulsion	115@T	62@S	69@K	18	483	1	607	0.00159398	0.141514
Escape,Repulsion,Attraction,Repulsion,Repulsion	326@S	362@I	357@G,115@A,B07,286@R	35	89	29	948	0.00159804	0.141756
Escape,Reversion,Reversion,Escape,Escape	68@V	20@R	A74,12@K,61@M,76@R	1	3	1071	62	0.0016	0.141813
Attraction,Repulsion,Repulsion	72@T	12@N	A74,91@K	20	541	0	573	0.00160859	0.142456
Reversion	102@E	98@K		111	3	981	1	0.00161514	0.142918
Attraction,Attraction,Repulsion	228@I	79@H	C14,54@A	4	108	8	1001	0.00162092	0.143311
Reversion,Escape,Escape,Attraction,Escape,Repulsion	101@L	69@Q	12@K,62@E,61@I,62@K,B13	989	112	3	3	0.00162321	0.143394
Attraction	113@Q	130@Q		566	6	524	19	0.00162686	0.143552
Reversion,Reversion,Escape,Attraction	58@R	247@I	163@G,256@I,11@D	551	0	521	33	0.00162767	0.143552
Attraction,Repulsion,Escape,Reversion,Attraction,Attraction	339@S	34@L	7@I,11@G,12@E,85@L,78@V	20	6	367	715	0.00163039	0.143673
Attraction,Escape,Escape,Attraction,Repulsion	54@A	65@H	62@K,79@F,46@V,39@K	31	149	80	834	0.00163835	0.144256
Reversion,Repulsion,Attraction,Escape	123@G	163@G	165@S,B57,190@I	4	494	4	59	0.0016404	0.144318
Repulsion,Escape,Attraction,Escape	223@H	224@A	225@P,223@N,223@V	2	5	1100	34	0.00164234	0.144369
Repulsion,Escape,Repulsion,Repulsion	72@S	67@S	301@Y,75@F,78@L	346	141	15	549	0.00164912	0.144846
Repulsion,Escape,Attraction,Escape,Attraction	76@T	82@I	84@V,67@A,60@L,91@K	3	2	136	933	0.00165126	0.144915
Repulsion,Escape,Attraction,Escape	91@K	82@I	84@V,67@A,60@L	40	414	91	489	0.00165927	0.145466
Reversion,Escape,Repulsion,Escape,Escape	267@V	264@R	173@A,136@R,268@L,B27	16	5	1076	42	0.00166025	0.145466
Escape,Attraction,Repulsion	127@Q	126@N	113@Q,127@P	35	418	11	627	0.00167022	0.146196
Escape,Reversion	60@I	43@K	9@S	22	1098	4	15	0.00167236	0.146196
Escape,Reversion,Reversion,Escape	30@M	207@E	A34,215@L,260@E	389	47	683	16	0.00167269	0.146196
Escape,Reversion,Escape,Attraction,Attraction,Attraction	15@N	11@E	9@S,7@I,91@G,30@M,4@S	7	0	371	757	0.00167727	0.146477
Escape,Escape	118@Q	119@A	112@Q	1	4	920	167	0.00168676	0.147086
Escape,Attraction,Attraction,Escape,Attraction	218@I	248@A	228@I,256@V,242@N,B41	15	1	587	511	0.00168775	0.147086
Reversion,Attraction	61@I	148@T	142@M	4	285	3	821	0.00168869	0.147086
Attraction,Escape,Escape	86@F	120@A	123@G,215@T	6	3	1025	83	0.00168974	0.147086
Reversion,Attraction	111@C	319@E	340@G	40	70	612	395	0.00169233	0.147102
Reversion,Repulsion,Escape	186@M	64@L	62@N,58@R	8	3	1105	19	0.00169267	0.147102
Repulsion	121@D	126@R		21	875	0	188	0.00169579	0.147253
Escape,Reversion,Escape,Reversion,Repulsion,Attraction,Escape,Escape	260@D	268@L	264@K,203@E,B27,215@L,273@I,146@P,267@V	412	27	606	76	0.00170716	0.148041
Repulsion,Attraction,Attraction,Escape	268@L	264@K	173@A,267@V,B27	4	1022	31	72	0.00170899	0.148041
Repulsion,Attraction,Attraction	121@T	120@D	256@V,128@I	3	1	16	1101	0.00170902	0.148041
Repulsion,Repulsion,Escape,Attraction,Repulsion	286@K	303@V	340@A,312@D,A23,125@K	48	337	19	714	0.00171149	0.148097
Attraction	190@A	114@Q		3	9	26	1080	0.00171243	0.148097
Repulsion,Reversion	115@A	127@S	126@V	5	547	3	538	0.00172027	0.14865
Repulsion,Escape,Repulsion,Reversion,Escape,Attraction	268@I	260@D	215@L,B35,250@M,136@Q,207@D	6	5	433	684	0.00172161	0.14865
Escape,Escape,Reversion,Escape,Attraction,Attraction	93@G	58@K	90@E,62@N,247@I,119@Q,61@M	16	2	508	580	0.00172383	0.148663
Reversion,Escape,Repulsion,Attraction,Escape	28@H	7@V	11@G,34@L,4@R,9@S	90	219	573	215	0.00172454	0.148663
Attraction,Repulsion,Attraction	127@K	95@R	28@Q,248@A	462	93	124	401	0.0017344	0.149341
Reversion,Reversion,Escape,Escape	280@A	211@E	146@P,242@T,A25	8	4	1081	35	0.0017352	0.149341
Escape,Escape,Repulsion,Reversion,Escape,Escape,Repulsion,Attraction	49@D	76@R	75@I,A01,18@K,20@R,176@A,58@Q,4@R	11	2	428	659	0.00174001	0.149635
Escape,Attraction,Attraction,Escape,Reversion,Attraction	91@D	15@K	93@K,90@A,91@N,163@G,226@G	11	3	329	769	0.00174164	0.149655
Reversion,Attraction,Reversion,Repulsion,Attraction,Attraction,Attraction,Escape	268@I	260@E	215@L,B35,250@M,136@Q,207@D,147@L,228@V	5	6	683	434	0.00175113	0.15035
Escape,Escape,Escape	343@I	111@S	62@K,61@I	2	6	930	170	0.00175321	0.150408
Escape,Escape,Reversion,Escape	186@S	165@S	163@G,168@I,147@L	23	8	1060	50	0.00175567	0.150498
Attraction,Reversion,Repulsion,Reversion,Attraction,Reversion,Escape,Repulsion,Escape,Repulsion	215@L	219@Q	228@I,218@V,280@T,223@I,230@D,252@N,228@M,248@T,75@I	145	739	14	179	0.00175896	0.150659
Escape,Escape,Repulsion,Attraction,Repulsion,Attraction,Attraction	90@A	61@I	301@Y,62@N,59@Q,91@G,48@P,104@L	66	38	220	792	0.00176691	0.15122
Reversion,Escape,Reversion,Attraction	147@L	286@K	303@T,332@N,136@Q	130	141	251	580	0.00177883	0.152051
Repulsion,Repulsion,Attraction,Escape	54@A	121@G	340@A,125@S,128@A	5	171	72	820	0.00177947	0.152051
Escape,Attraction,Repulsion	54@A	109@K	112@K,58@Q	19	162	25	886	0.00178301	0.152232
Repulsion,Reversion,Escape,Repulsion,Attraction,Escape,Reversion	25@G	280@T	159@V,46@L,138@I,312@E,148@A,B52	423	680	3	4	0.00178673	0.152427
Escape,Escape,Attraction	125@N	118@A	119@Q,126@R	90	0	406	24	0.00179047	0.152625
Escape	335@K	118@V		1	639	11	462	0.00179759	0.15311
Repulsion,Repulsion,Reversion,Repulsion	252@S	4@S	11@E,111@I,14@D	18	374	3	716	0.00180011	0.153202
Attraction,Repulsion	30@M	223@H	224@P	7	430	0	703	0.00181748	0.154549
Escape,Attraction,Attraction,Attraction,Attraction,Attraction,Escape	28@K	186@S	190@T,B81,182@S,177@D,147@M,148@T	0	364	31	706	0.00181882	0.154549
Attraction,Attraction,Escape,Reversion,Attraction,Reversion,Reversion,Attraction,Escape	292@S	12@K	91@N,91@G,A74,20@R,15@Q,72@S,69@Q,91@Q	4	7	649	456	0.00182317	0.154795
Reversion,Attraction,Escape	62@Q	111@I	4@R,119@K	0	117	37	973	0.00183093	0.155331
Attraction,Attraction,Repulsion	15@K	28@S	B42,20@K	12	332	5	768	0.00183409	0.155337
Attraction,Attraction,Repulsion,Repulsion,Escape,Repulsion,Attraction,Attraction,Repulsion	117@Q	242@N	B57,B58,250@M,182@Q,C06,B57,357@S,292@S	146	929	3	41	0.00183599	0.155337
Reversion,Repulsion,Reversion,Escape,Escape,Reversion,Attraction,Attraction	123@K	340@G	319@E,303@T,339@P,342@S,C03,336@A,326@S	5	3	91	450	0.00183753	0.155337
Repulsion,Repulsion,Escape	90@Q	54@L	90@A,28@K	0	527	9	582	0.00183883	0.155337
Repulsion,Repulsion	84@V	38@G	34@L	8	288	0	824	0.00183981	0.155337
Escape,Repulsion,Repulsion,Attraction,Escape,Repulsion	163@A	168@I	335@K,260@D,146@A,182@E,252@G	51	1020	0	68	0.00184048	0.155337
Escape,Escape,Reversion,Repulsion	95@R	90@A	9@S,91@K,54@S	97	497	9	498	0.00184235	0.155337
Attraction,Attraction,Escape,Attraction	18@R	82@V	84@T,67@A,60@L	188	6	719	138	0.00184261	0.155337
Repulsion,Repulsion	34@L	15@N	11@E	7	382	0	721	0.00184946	0.155792
Attraction,Escape,Attraction,Attraction,Attraction,Repulsion	91@R	28@Q	A03,30@M,95@R,61@M,C17	80	250	103	638	0.00186127	0.156663
Attraction,Repulsion,Escape	9@S	95@Q	93@K,90@K	2	559	47	526	0.00186655	0.156984
Attraction,Attraction,Attraction	186@S	165@N	163@G,168@I	8	23	47	1063	0.00187168	0.157291
Escape,Attraction,Attraction,Repulsion,Escape,Attraction,Attraction	348@S	54@A	90@E,62@N,79@H,84@T,68@I,65@H	4	2	177	912	0.00187356	0.157326
Attraction	230@D	219@P		3	39	4	1081	0.00187577	0.157388
Escape,Attraction,Escape,Repulsion,Attraction,Escape,Escape,Escape,Repulsion	55@E	62@K	111@S,90@E,69@K,61@I,65@H,112@K,30@R,61@L	234	693	32	123	0.00187744	0.157405
Escape,Attraction	75@I	46@L	B37	40	12	561	505	0.00188361	0.157798
Reversion,Repulsion	342@S	119@G	42@E	7	157	4	949	0.0018911	0.158302
Escape,Escape,Reversion,Reversion,Attraction,Reversion,Escape,Escape,Reversion,Attraction	223@A	242@T	B57,B58,250@M,182@Q,C06,B57,159@I,292@S,117@Q	26	0	940	164	0.00189447	0.15846
Repulsion	54@A	15@H		4	177	0	913	0.00190777	0.159448
Repulsion,Escape,Escape,Attraction	91@G	84@T	82@V,B51,138@S	118	9	696	295	0.00190989	0.159501
Attraction,Escape,Reversion,Reversion,Attraction,Attraction	309@S	312@E	B44,303@V,331@K,315@N,292@S	27	1	559	526	0.00191242	0.159587
Repulsion,Attraction,Attraction,Escape	114@N	173@T	186@T,256@V,312@D	3	5	603	493	0.00192382	0.160413
Repulsion	11@E	15@N		7	371	0	757	0.0019281	0.160645
Escape,Reversion	186@T	263@R	331@K	3	1088	3	48	0.00194088	0.161584
Repulsion,Repulsion,Attraction	128@A	121@G	340@A,125@S	8	8	68	1013	0.00194569	0.161858
Reversion,Attraction,Reversion,Escape,Attraction,Reversion,Attraction,Repulsion	357@G	67@A	301@Y,75@F,72@S,82@I,A30,78@L,48@A	396	266	284	90	0.00194908	0.162014
Attraction,Attraction,Repulsion	118@A	176@S	72@T,146@A	1004	13	78	5	0.00196347	0.163084
Escape,Escape	84@V	86@Y	C14	285	12	817	8	0.00197156	0.163629
Escape,Escape,Reversion,Reversion,Attraction,Reversion,Escape,Escape,Reversion	117@Q	242@T	B57,B58,250@M,182@Q,C06,B57,159@I,292@S	913	160	41	3	0.0019889	0.16494
Escape,Reversion,Attraction	81@A	55@E	62@E,79@Y	27	0	898	155	0.00199152	0.165029
Attraction,Attraction,Escape,Reversion,Attraction,Reversion,Reversion,Attraction,Escape,Escape	62@A	12@K	91@N,91@G,A74,20@R,15@Q,72@S,69@Q,91@Q,292@S	16	10	638	451	0.00199576	0.165252
Escape,Attraction,Attraction,Escape,Reversion,Attraction,Attraction	91@G	15@K	93@K,90@A,91@N,163@G,226@G,91@D	70	57	271	710	0.0019989	0.165385
Repulsion,Attraction,Reversion	79@Y	75@L	88@V,219@Q	593	54	418	18	0.00200506	0.16562
Repulsion,Repulsion,Reversion	14@D	4@S	11@E,111@I	18	1111	3	5	0.00200621	0.16562
Reversion	243@P	144@H		12	3	1122	2	0.00200639	0.16562
Escape,Escape	121@G	128@V	124@D	65	12	946	66	0.00201409	0.166063
Attraction,Escape,Escape,Attraction,Repulsion,Attraction,Repulsion	15@R	65@H	62@K,79@F,46@V,39@K,54@A,62@R	26	451	83	549	0.00201486	0.166063
Repulsion,Repulsion,Repulsion,Escape,Attraction	332@N	286@R	303@T,309@A,136@Q,147@L	13	3	711	385	0.0020258	0.16671
Repulsion,Escape,Escape	122@P	138@L	200@M,182@H	4	7	466	131	0.00202582	0.16671
Repulsion	312@D	146@N		7	517	0	585	0.00203453	0.167298
Attraction	182@S	9@S		3	22	559	554	0.00204824	0.168174
Escape,Reversion,Attraction,Escape,Escape,Escape,Attraction	28@C	34@I	7@I,11@G,12@E,30@R,78@V,339@S	34	15	661	389	0.00204833	0.168174
Repulsion,Repulsion,Repulsion,Escape,Attraction,Attraction	119@M	286@R	303@T,309@A,136@Q,147@L,332@N	10	4	709	378	0.00205424	0.16853
Escape,Attraction,Repulsion	95@R	127@K	106@K,126@E	462	124	93	401	0.00207324	0.169958
Attraction,Escape,Reversion	323@V	303@T	286@R,339@T	1001	95	36	1	0.00207631	0.170079
Escape	215@L	86@W		0	917	5	190	0.00207974	0.17023
Escape,Attraction,Attraction	67@A	66@P	224@P,C07	677	7	338	10	0.00208152	0.170245
Escape,Attraction,Reversion	12@K	93@G	95@K,66@S	11	640	7	458	0.00210993	0.172437
Reversion,Attraction,Reversion,Repulsion,Attraction,Attraction,Attraction,Escape,Escape	117@P	260@E	215@L,B35,250@M,136@Q,207@D,147@L,228@V,268@I	8	10	675	422	0.00211613	0.172812
Reversion,Escape,Escape,Attraction,Escape,Repulsion,Escape	126@A	69@Q	12@K,62@E,61@I,62@K,B13,101@L	1	4	980	109	0.00213474	0.174087
Reversion,Escape,Escape,Attraction	126@K	113@Q	112@K,30@Q,182@S	18	10	545	538	0.00213499	0.174087
Repulsion	76@R	49@D		11	428	2	659	0.00213954	0.174324
Repulsion,Escape	111@C	319@D	340@G	70	40	393	614	0.00214726	0.17482
Escape,Escape,Escape,Repulsion,Attraction,Attraction,Escape,Escape,Reversion	117@Q	147@I	B57,B13,A25,163@A,148@A,B15,146@S,252@H	776	286	36	6	0.00215528	0.17534
Repulsion,Attraction,Reversion,Escape,Escape	130@H	7@I	11@G,34@L,4@R,9@S	0	12	431	643	0.00215922	0.175527
Attraction,Escape,Attraction	123@A	119@Q	118@Q,58@K	3	6	10	558	0.00216322	0.175718
Repulsion,Escape,Escape,Repulsion,Escape	163@N	138@L	200@M,182@H,122@P,186@T	8	4	913	195	0.00216756	0.175937
Reversion,Attraction,Reversion,Repulsion,Attraction,Attraction,Attraction,Escape,Escape,Escape,Reversion	211@E	260@E	215@L,B35,250@M,136@Q,207@D,147@L,228@V,268@I,117@P,186@M	654	435	36	6	0.00217326	0.176266
Reversion	312@E	315@N		563	13	524	2	0.0021805	0.176702
Repulsion,Attraction	138@L	223@A	123@A	26	890	0	196	0.00218194	0.176702
Escape,Escape,Attraction,Reversion,Attraction	146@N	62@Q	126@S,65@H,75@F,253@N	4	3	113	1015	0.00219173	0.177361
Attraction,Reversion	112@K	126@G	127@N	19	531	395	158	0.00219969	0.177864
Repulsion,Repulsion	28@H	93@Q	165@N	7	300	2	823	0.00220128	0.177864
Escape,Escape,Escape,Reversion	331@K	111@S	62@K,61@I,343@I	885	176	34	0	0.00220466	0.178003
Attraction,Escape,Reversion,Attraction,Escape,Repulsion,Attraction,Reversion,Escape	125@K	303@T	286@R,339@T,323@V,340@G,46@L,339@P,15@T,34@L	11	4	530	13	0.00221917	0.178921
Repulsion,Escape,Reversion,Reversion	215@L	112@Q	113@Q,343@I,90@Q	425	485	130	65	0.00221936	0.178921
Attraction,Repulsion	60@I	43@R	301@Y	1091	24	15	4	0.00222108	0.178924
Repulsion	173@T	119@V		21	582	2	499	0.00222474	0.179084
Repulsion,Repulsion,Escape,Attraction,Repulsion,Attraction,Attraction	91@R	303@V	340@A,312@D,A23,125@K,286@K,138@M	18	317	49	710	0.00224397	0.180496
Repulsion,Escape	46@V	49@D	76@R	0	480	13	605	0.00225017	0.180859
Reversion,Repulsion,Attraction,Escape,Escape	42@E	163@G	165@S,B57,190@I,123@G	48	1074	3	12	0.00226037	0.181543
Escape,Reversion,Attraction,Repulsion	49@G	55@E	62@E,79@Y,81@A	907	143	22	13	0.00227544	0.182616
Repulsion,Attraction,Reversion,Escape,Escape,Attraction	112@Q	7@I	11@G,34@L,4@R,9@S,130@H	370	179	59	479	0.00227772	0.182662
Reversion	303@T	239@S		1	1040	3	94	0.00228272	0.182925
Attraction,Repulsion,Escape,Reversion,Attraction,Attraction,Attraction,Escape	28@C	34@L	7@I,11@G,12@E,85@L,78@V,339@S,30@R	15	34	374	689	0.00229371	0.183358
Repulsion,Repulsion,Repulsion,Repulsion,Attraction	91@Q	332@I	336@G,312@D,339@P,268@L	7	13	26	1093	0.00229394	0.183358
Attraction,Escape,Reversion,Attraction	340@G	303@T	286@R,339@T,323@V	532	38	484	57	0.00229462	0.183358
Repulsion	122@A	123@D		4	51	0	500	0.00229497	0.183358
Escape,Escape,Attraction,Escape,Attraction,Repulsion,Reversion	242@T	252@G	250@M,228@L,138@A,248@G,168@V,215@L	105	866	34	130	0.0023132	0.184676
Attraction,Escape,Attraction,Repulsion,Escape,Reversion,Attraction,Escape	247@V	252@N	228@L,219@Q,228@I,173@S,215@I,78@L,138@M	0	30	454	609	0.00231833	0.184935
Attraction,Attraction	342@S	252@A	62@K	7	162	10	953	0.00231989	0.184935
Reversion,Reversion,Repulsion,Escape,Reversion,Escape	28@Q	280@V	301@Y,159@V,211@E,312@E,332@T	76	116	570	345	0.00234506	0.186579
Repulsion	186@T	343@L		1083	6	47	3	0.00234526	0.186579
Repulsion,Attraction,Reversion,Escape,Escape,Attraction,Escape,Repulsion	190@T	163@A	165@S,168@I,310@T,B57,191@I,B81,243@P	1059	54	15	14	0.00234576	0.186579
Attraction,Repulsion,Repulsion,Attraction	30@M	207@D	A34,215@L,260@E	46	390	15	684	0.00235353	0.187011
Repulsion	138@A	91@D		3	22	11	1099	0.00235469	0.187011
Attraction	30@M	123@K		3	11	5	559	0.00237129	0.18819
Repulsion,Attraction,Reversion,Escape,Escape,Attraction,Attraction,Repulsion,Repulsion	94@V	7@I	11@G,34@L,4@R,9@S,130@H,112@Q,30@M,91@K	390	510	36	116	0.00237438	0.188296
Attraction,Repulsion,Attraction,Escape	93@K	95@R	28@Q,248@A,127@K	13	26	580	482	0.00238933	0.189115
Attraction,Attraction,Repulsion	215@L	200@I	138@A,C18	19	899	0	195	0.00239002	0.189115
Escape,Escape,Reversion	215@L	200@M	138@A,C18	899	19	195	0	0.00239002	0.189115
Repulsion,Repulsion	28@K	54@L	90@A	5	359	4	733	0.0023953	0.189393
Repulsion,Escape,Reversion	90@Q	112@Q	113@Q,343@I	13	513	541	44	0.00239807	0.189472
Repulsion,Attraction,Reversion,Escape,Escape,Attraction,Attraction,Repulsion,Repulsion,Repulsion,Repulsion	69@Q	7@I	11@G,34@L,4@R,9@S,130@H,112@Q,30@M,91@K,94@V,124@D	380	572	50	66	0.00240473	0.18979
Attraction,Escape,Reversion,Attraction,Escape,Repulsion,Attraction,Reversion,Escape,Reversion,Escape	138@M	303@T	286@R,339@T,323@V,340@G,46@L,339@P,15@T,34@L,125@K,312@D	52	6	976	90	0.00240571	0.18979
Repulsion,Attraction	61@M	28@P	62@R	4	246	0	859	0.00240742	0.18979
Escape,Attraction,Escape,Escape,Attraction	35@I	30@M	28@Q,61@M,C17,301@Y	54	8	383	687	0.00240944	0.18981
Repulsion,Attraction	224@Q	128@I	127@K	3	2	38	1085	0.00241228	0.189876
Escape,Attraction,Repulsion,Attraction	35@I	127@K	106@K,126@E,95@R	57	3	497	549	0.00241383	0.189876
Repulsion,Attraction,Reversion,Escape,Escape,Attraction,Attraction,Repulsion	91@K	7@I	11@G,34@L,4@R,9@S,130@H,112@Q,30@M	195	266	234	355	0.00241999	0.190221
Escape,Reversion,Escape,Reversion,Repulsion,Attraction	146@P	268@L	264@K,203@E,B27,215@L,273@I	222	10	779	92	0.00243335	0.19113
Repulsion,Attraction,Escape,Escape,Repulsion,Attraction	28@R	18@K	11@G,76@R,20@K,62@N,117@Q	103	13	789	191	0.00244609	0.19199
Attraction,Attraction,Attraction,Attraction,Escape	93@D	165@N	163@G,168@I,186@S,173@A	19	403	35	639	0.002455	0.192421
Reversion,Attraction,Reversion,Repulsion,Attraction,Attraction,Attraction,Escape,Escape,Escape	186@M	260@E	215@L,B35,250@M,136@Q,207@D,147@L,228@V,268@I,117@P	0	10	692	431	0.00245518	0.192421
Repulsion,Escape,Reversion,Reversion,Attraction	68@I	112@Q	113@Q,343@I,90@Q,215@L	26	9	529	563	0.0024583	0.192525
Escape,Attraction,Escape,Repulsion,Escape,Escape,Attraction	11@D	312@D	B44,303@V,309@S,331@K,315@G,292@S	6	0	517	585	0.00246513	0.192829
Attraction,Attraction,Attraction,Repulsion,Attraction	342@N	331@R	B08,312@E,332@N,111@S	3	1	33	1091	0.00246758	0.192829
Escape,Escape,Escape,Reversion,Escape	342@N	331@K	B08,312@E,332@N,111@S	1	3	1091	33	0.00246758	0.192829
Attraction	280@I	126@S		10	0	410	656	0.00247562	0.193315
Attraction,Attraction	55@D	49@S	20@K	5	47	15	1051	0.00248068	0.193569
Escape,Repulsion	115@T	138@H	215@L	10	490	0	608	0.0024826	0.193578
Reversion,Attraction,Attraction	66@S	319@E	340@G,111@C	14	3	628	467	0.00248558	0.193669
Repulsion	248@G	223@T		5	409	0	707	0.00249869	0.194536
Repulsion	67@S	122@P		11	336	0	197	0.00250035	0.194536
Attraction,Escape,Attraction,Escape,Attraction,Escape,Repulsion	9@S	93@D	15@R,94@I,B40,122@K,B41,303@V	197	323	223	350	0.00250923	0.195085
Reversion,Escape,Attraction,Attraction,Escape	28@R	18@R	11@G,76@R,20@K,62@N	12	104	183	797	0.00252506	0.196174
Repulsion,Escape	11@G	225@A	224@P	0	738	11	386	0.00254188	0.19712
Reversion,Attraction	11@G	225@P	224@P	738	0	386	11	0.00254188	0.19712
Reversion,Escape	61@M	138@A	200@M	4	246	21	837	0.00254309	0.19712
Escape,Reversion,Reversion,Escape,Escape	190@A	250@M	252@G,260@E,215@L,62@K	9	3	1079	50	0.00254645	0.19712
Attraction,Repulsion,Repulsion,Attraction,Attraction	190@A	250@I	252@G,260@E,215@L,62@K	3	9	50	1079	0.00254645	0.19712
Attraction,Attraction,Reversion,Repulsion,Escape,Escape,Escape,Reversion,Escape,Attraction,Escape	48@A	76@K	75@I,A01,18@K,20@R,15@K,75@F,49@D,4@R,30@R,58@Q	0	15	649	430	0.00256005	0.197888
Reversion,Escape,Repulsion,Attraction,Escape,Attraction	130@H	7@V	11@G,34@L,4@R,9@S,28@H	12	0	642	432	0.00256008	0.197888
Repulsion	122@A	125@G		3	44	2	480	0.00257534	0.198924
Attraction,Attraction	343@I	215@T	119@M	4	4	19	1114	0.00257723	0.198927

## Sheet: hla-codon associations
LeafDistribution	PredictorAttribute	TargetAttribute	ConditioningPredictorAttributes	TT	TF	FT	FF	PValue	qValue
Escape	B57	242@T		13	78	961	86	2.08849e-45	1.55258e-41
Attraction	B57	242@N		78	13	72	977	2.08849e-45	1.55258e-41
Escape	A03	28@K		21	162	343	573	1.43735e-42	7.12348e-39
Attraction,Attraction	B58	242@N	B57	68	144	82	846	1.18429e-35	4.40202e-32
Escape,Escape	B58	242@T	B57	141	71	833	93	3.77748e-29	1.12327e-25
Escape	B57	147@I		21	65	806	233	1.06871e-19	2.64827e-16
Attraction	B07	357@G		175	11	552	381	1.93514e-19	4.11024e-16
Escape	B07	357@S		11	175	377	557	8.0605e-19	1.49804e-15
Attraction	B57	147@L		61	25	217	824	7.61419e-18	1.25786e-14
Attraction	B44	312@E		148	39	438	488	1.40715e-17	2.09215e-14
Escape	B44	312@D		39	148	487	440	2.15469e-17	2.81408e-14
Escape,Escape	B13	147@I	B57	6	31	821	267	2.27125e-17	2.81408e-14
Attraction,Attraction	B13	147@L	B57	29	8	249	841	2.87862e-16	3.29225e-13
Escape	A74	20@R		33	25	1038	39	5.50611e-16	5.84749e-13
Attraction	A03	28@Q		76	114	122	805	1.95238e-15	1.9352e-12
Escape	B57	146@A		23	60	799	234	7.80219e-15	7.25019e-12
Attraction,Attraction,Escape	A74	12@K	91@N,91@G	35	23	618	445	3.35167e-14	2.93134e-11
Repulsion	B14	302@R		16	50	13	1059	9.51471e-14	7.85915e-11
Attraction	B57	146@P		52	30	183	851	1.27723e-13	9.99469e-11
Reversion	B14	302@K		50	16	1058	14	2.18054e-13	1.62101e-10
Escape	C17	28@H		35	107	273	682	2.9259e-13	2.07154e-10
Attraction	B81	182@E		7	61	0	1076	4.51046e-10	3.04825e-07
Repulsion	B15	26@R		35	252	23	788	6.37729e-10	4.1225e-07
Escape	B81	177@E		57	11	1068	7	6.69265e-10	4.1461e-07
Escape	B81	182@Q		45	23	1024	51	8.24181e-10	4.90157e-07
Attraction,Escape	B81	186@T	190@T	47	21	1044	30	1.45994e-09	8.34862e-07
Reversion,Attraction	B35	260@E	215@L	100	5	593	436	4.59649e-09	2.53113e-06
Repulsion,Escape	B35	260@D	215@L	5	100	435	594	5.23273e-09	2.77858e-06
Reversion	B15	26@K		248	39	775	33	9.62923e-09	4.93681e-06
Attraction,Escape	C06	146@P	B57	27	195	198	654	1.15368e-08	5.71763e-06
Attraction	A74	12@N		11	47	9	1070	4.292e-08	2.0585e-05
Escape,Attraction	C06	146@A	B57	179	43	613	240	4.81147e-08	2.23553e-05
Escape	A74	91@R		0	59	334	699	5.04701e-08	2.27391e-05
Repulsion,Attraction	A24	30@R	9@S	85	53	230	734	5.47154e-08	2.39267e-05
Repulsion,Attraction	A74	20@K	112@Q	17	41	28	1051	1.20979e-07	5.1392e-05
Attraction,Escape	A01	79@Y	65@H	78	97	579	343	3.58908e-07	0.000148229
Attraction,Escape,Reversion,Attraction	C08	146@P	B57,C06,211@E	43	65	182	784	4.99132e-07	0.00020057
Escape,Attraction	B81	186@S	190@T	16	52	15	1061	1.05097e-06	0.000411205
Escape	B40	93@E		27	43	549	478	1.11029e-06	0.000423276
Attraction	B08	331@R		14	128	22	964	1.22267e-06	0.000443382
Escape	B08	331@K		128	14	964	22	1.22267e-06	0.000443382
Escape,Attraction	A01	79@F	65@H	92	84	334	590	1.68574e-06	0.000596751
Attraction	B42	28@S		10	119	7	1004	4.04951e-06	0.00140019
Escape,Reversion,Escape	B27	268@L	264@K,203@E	15	16	1011	87	4.53123e-06	0.00153115
Escape,Attraction,Escape	C08	146@A	B57,C06	58	50	734	233	4.77352e-06	0.00157717
Repulsion,Escape	B51	84@T	82@V	23	43	798	262	5.51371e-06	0.00178213
Attraction,Escape,Escape	C14	79@Y	65@H,A01	3	11	627	416	6.84261e-06	0.00216459
Attraction	B81	182@S		11	57	14	1062	6.98823e-06	0.0021646
Reversion,Repulsion	B57	163@G	165@S	19	73	32	1020	9.54303e-06	0.00289563
Repulsion,Repulsion	C06	149@A	146@P	4	230	0	865	1.87498e-05	0.00557544
Attraction,Repulsion,Reversion,Escape,Repulsion,Attraction	B27	268@M	264@K,203@E,273@I,B08,215@L	13	17	76	1020	2.15674e-05	0.00628754
Escape,Escape	A31	91@R	A74	9	37	325	721	2.23317e-05	0.00638514
Escape,Attraction,Attraction,Escape	A30	28@K	A03,67@S,30@R	15	206	349	529	2.29226e-05	0.00643045
Attraction,Attraction,Attraction	A25	147@L	B57,B13	13	6	265	841	2.90924e-05	0.00801011
Repulsion,Attraction	A74	20@S	28@R	4	54	6	1074	3.05276e-05	0.00825244
Repulsion,Attraction	A25	211@D	146@P	6	13	33	1086	3.16136e-05	0.00839341
Reversion,Escape,Repulsion,Escape	B27	264@R	173@A,136@R,268@L	24	13	1070	35	4.33977e-05	0.0113199
Escape,Escape,Escape	A25	147@I	B57,B13	6	13	819	285	4.50322e-05	0.0115438
Escape,Attraction,Escape,Escape	B41	93@E	B40,94@I,15@E	1	18	575	503	5.3456e-05	0.0134709
Attraction,Attraction	A01	76@K	75@I	127	48	522	399	5.5642e-05	0.0136169
Attraction,Repulsion,Reversion,Escape	B08	268@M	264@K,203@E,273@I	3	144	86	893	5.58671e-05	0.0136169
Repulsion	A24	30@H		4	141	0	992	6.06403e-05	0.0145419
Escape,Attraction,Escape	A29	79@F	65@H,A01	30	106	396	568	7.2008e-05	0.0169939
Reversion,Repulsion,Reversion,Attraction	A31	91@K	12@K,124@K,10@G	31	14	444	601	8.08667e-05	0.0186547
Reversion,Reversion,Escape	A25	211@E	146@P,242@T	13	6	1083	36	8.15545e-05	0.0186547
Attraction,Escape,Escape,Attraction	A29	79@Y	65@H,A01,C14	104	32	553	408	8.43964e-05	0.0188208
Escape,Escape	A01	76@R	75@I	47	128	392	533	8.48127e-05	0.0188208
Reversion,Escape,Escape	A24	30@K	34@L,28@H	25	114	239	708	9.26901e-05	0.0202664
Escape	C14	86@Y		10	3	1067	15	0.00010264	0.0221167
Attraction,Repulsion,Escape	B07	118@T	126@R,91@K	1	182	42	884	0.000116156	0.0246715
Reversion,Attraction,Reversion,Escape,Attraction	A30	67@A	301@Y,75@F,72@S,82@I	208	18	475	353	0.000122116	0.0255721
Repulsion,Attraction,Reversion,Escape	B57	163@A	165@S,168@I,310@T	66	26	1009	42	0.000135238	0.0279267
Repulsion,Attraction,Attraction	B42	30@R	9@S,A24	29	100	286	689	0.000137344	0.027973
Repulsion,Repulsion,Escape	A23	303@V	340@A,312@D	0	125	67	951	0.000161668	0.0324822
Repulsion,Repulsion	B08	268@I	264@K	6	143	5	984	0.000171081	0.0337848
Attraction	C14	79@H		3	12	8	1074	0.000174642	0.0337848
Attraction	B58	119@P		4	202	2	917	0.000174968	0.0337848
Attraction,Attraction,Escape	A31	94@V	30@M,93@D	26	16	904	146	0.000179058	0.0341312
Repulsion,Attraction	A11	127@P	301@Y	10	53	21	1032	0.000189147	0.0350364
Escape,Escape,Attraction	A31	94@I	30@M,93@D	16	26	145	906	0.000190263	0.0350364
Escape,Escape,Reversion,Reversion,Attraction	C06	242@T	B57,B58,250@M,182@Q	182	52	754	107	0.000190876	0.0350364
Attraction,Reversion,Reversion,Escape	B07	362@V	357@G,115@A,286@R	155	24	895	43	0.000235032	0.042578
Escape,Attraction,Escape	C17	30@M	28@Q,61@M	86	56	350	605	0.00023769	0.042578
Attraction,Escape,Repulsion,Escape	A11	357@G	B07,362@I,43@R	38	24	689	366	0.000273732	0.0484506
Reversion,Repulsion,Reversion,Attraction	B44	121@A	124@N,123@A,91@K	14	175	42	894	0.000281327	0.049209
Repulsion,Reversion,Escape	C06	12@Q	115@A,28@K	3	230	52	802	0.000293275	0.0507025
Attraction,Attraction,Repulsion,Repulsion,Escape	C06	242@N	B57,B58,250@M,182@Q	49	185	96	767	0.000299966	0.0512444
Attraction,Reversion,Repulsion,Escape	B58	146@S	339@Q,256@I,147@L	0	214	25	896	0.000303303	0.0512444
Attraction,Escape,Attraction,Escape,Attraction	B41	93@D	15@R,94@I,B40,122@K	11	8	412	668	0.000307696	0.0514025
Repulsion,Repulsion	A11	218@I	46@L	3	65	13	1057	0.000315277	0.0520837
Reversion,Escape,Escape,Attraction,Escape	B13	69@Q	12@K,62@E,61@I,62@K	31	9	964	108	0.000332883	0.054388
Escape,Repulsion,Attraction	B07	362@I	357@G,115@A	24	155	42	896	0.000364461	0.0589001
Repulsion,Attraction,Attraction,Attraction	B57	62@E	72@S,55@G,69@K	12	79	77	934	0.000385012	0.0615522
Attraction	A74	20@Q		3	55	1	1076	0.00040759	0.0644686
Repulsion,Reversion	B58	55@G	62@E	0	214	49	850	0.000422093	0.0660597
Escape,Attraction,Attraction,Escape,Escape,Escape,Escape,Attraction	B15	28@K	A03,67@S,30@R,A30,12@Q,95@R,122@K	86	212	278	525	0.000436603	0.0676188
Repulsion	B57	138@F		3	87	1	1047	0.000487632	0.0742824
Attraction	B81	182@R		3	65	1	1075	0.000495155	0.0742824
Reversion,Attraction,Attraction	B51	84@V	82@V,12@E	43	23	258	803	0.000503576	0.0742824
Attraction,Escape,Attraction	B40	93@D	15@R,94@I	36	35	387	641	0.000504471	0.0742824
Repulsion,Attraction,Reversion,Escape,Escape,Attraction	B81	163@A	165@S,168@I,310@T,B57,191@I	64	4	1011	64	0.000504608	0.0742824
Repulsion,Attraction,Attraction	B27	264@K	173@A,267@V	7	30	29	1077	0.000576039	0.0839661
Reversion,Escape	C14	81@T	62@G	11	4	1041	30	0.000647998	0.0935381
Attraction,Escape,Attraction	B57	54@S	90@E,62@N	82	7	781	226	0.000684976	0.0979252
Repulsion,Attraction	B58	95@L	215@V	5	210	1	925	0.000751762	0.10645
Attraction	B42	109@S		6	125	7	999	0.000770933	0.108134
Reversion	B81	184@L		65	3	1075	1	0.000796227	0.110128
Escape	A11	301@F		2	66	584	489	0.000807369	0.110128
Attraction	A11	301@Y		66	2	489	584	0.000807369	0.110128
Repulsion,Reversion,Escape,Repulsion,Attraction,Escape	B52	280@T	159@V,46@L,138@I,312@E,148@A	2	7	427	682	0.000816365	0.110343
Attraction,Attraction	B27	264@G	136@R	3	35	4	1102	0.000827567	0.110781
Repulsion,Reversion,Escape,Attraction	C02	12@Q	115@A,28@K,C06	14	139	41	893	0.000839555	0.110781
Repulsion	C08	332@A		4	104	2	987	0.000841956	0.110781
Reversion,Repulsion,Reversion,Escape,Escape	C03	340@G	319@E,303@T,339@P,342@S	53	150	507	363	0.000860772	0.111435
Escape,Attraction,Attraction,Escape	B41	248@A	228@I,256@V,242@N	8	11	594	505	0.000866774	0.111435
Attraction,Escape,Escape,Attraction,Escape,Attraction	A68	79@Y	65@H,A01,C14,A29,54@A	126	63	531	377	0.000869411	0.111435
Escape,Attraction,Escape,Escape	A68	79@F	65@H,A01,A29	61	128	365	546	0.000908394	0.115436
Repulsion	A11	83@V		3	65	1	1069	0.00092909	0.117065
Attraction,Repulsion,Escape,Escape	A23	95@Q	93@K,90@K,9@S	1	124	48	966	0.000950715	0.118783
Escape	B37	46@L		0	10	604	521	0.000969749	0.120152
Attraction,Escape	A68	130@Q	113@Q	179	9	922	16	0.000997741	0.122598
Repulsion,Reversion,Escape	C08	26@R	B15,112@Q	0	107	56	897	0.00102693	0.125151
Escape,Escape,Escape,Repulsion,Attraction,Attraction	B15	147@I	B57,B13,A25,163@A,148@A	245	58	582	240	0.00105714	0.127785
Repulsion,Repulsion	B44	332@A	C08	4	190	2	944	0.00107088	0.128402
Repulsion,Escape,Escape,Attraction,Escape	A11	84@T	82@V,B51,138@S,91@G	28	37	791	268	0.00113411	0.134895
Escape,Attraction,Reversion,Attraction	A11	357@S	B07,362@I,43@R	23	39	364	692	0.00114895	0.135576
Escape,Escape,Escape,Repulsion,Attraction,Attraction,Escape,Escape,Reversion,Escape,Attraction	B14	147@I	B57,B13,A25,163@A,148@A,B15,146@S,252@H,117@Q,243@P	60	8	767	290	0.00120241	0.140767
Attraction,Escape,Attraction,Attraction,Attraction	C17	28@Q	A03,30@M,95@R,61@M	29	113	160	776	0.00130134	0.151159
Attraction,Reversion,Attraction	A30	91@Q	28@C,107@E	8	220	12	900	0.00132569	0.151721
Escape,Repulsion	B08	68@I	54@A	10	139	25	963	0.00133711	0.151721
Escape,Escape	C18	200@M	138@A	73	5	1007	14	0.001347	0.151721
Attraction,Attraction	C18	200@I	138@A	5	73	14	1007	0.001347	0.151721
Reversion,Reversion,Escape,Attraction,Escape,Attraction,Reversion	A74	247@I	163@G,256@I,11@D,58@R,C06,252@N	51	8	1052	25	0.0013596	0.151989
Attraction,Attraction,Escape	A24	28@R	20@S,31@I	3	141	113	860	0.00140951	0.155703
Attraction	A34	207@D		10	41	51	1035	0.00141377	0.155703
Attraction	B18	92@V		3	69	2	1061	0.0014251	0.155797
Escape,Attraction,Attraction,Repulsion,Escape,Attraction,Attraction,Escape	B57	54@A	90@E,62@N,79@H,84@T,68@I,65@H,348@S	5	84	177	834	0.00155119	0.168343
Attraction	C04	92@L		4	173	1	921	0.00157223	0.169391
Repulsion,Repulsion,Escape,Attraction,Attraction	C06	247@V	163@G,256@I,252@N,11@D	14	221	16	845	0.00162851	0.174192
Repulsion,Attraction	B18	125@K	357@S	4	34	11	510	0.00171035	0.181133
Repulsion,Repulsion,Attraction,Attraction	B81	332@A	C08,B44,34@L	3	65	3	1069	0.00173269	0.181133
Escape,Attraction,Escape,Escape,Escape,Escape,Attraction,Attraction	A11	93@E	B40,94@I,15@E,B41,91@R,163@G,303@C	49	14	526	506	0.00174184	0.181133
Attraction,Repulsion,Repulsion,Repulsion,Escape	A30	12@N	A74,91@K,72@T,15@R	0	226	20	891	0.00174213	0.181133
Attraction,Attraction	A68	124@D	123@A	3	49	5	505	0.00180807	0.186683
Escape	A34	207@E		41	10	1033	53	0.00185354	0.190058
Escape,Repulsion	C03	303@A	339@P	6	202	4	889	0.00187511	0.190953
Repulsion,Reversion,Attraction,Escape	B08	223@V	224@A,230@E,340@G	36	108	313	628	0.00192403	0.194008
Reversion,Repulsion	B18	48@S	49@G	3	69	4	1063	0.00193121	0.194008
Repulsion,Reversion,Repulsion,Escape,Attraction	A74	109@N	112@K,90@A,99@E,223@P	58	1	997	74	0.00199109	0.198681
