# Supplementary material for: Phylogenetic Dependency Networks: Inferring Patterns of CTL Escape and Codon Covariation in HIV-1 Gag
Source: PLoS Comput Biol. 2008 Nov 21;4(11):e1000225. doi: 10.1371/journal.pcbi.1000225 (PMC2579584; doi:10.1371/journal.pcbi.1000225)
Supplement: Table S2 — Distance in Angstroms between codons with q<0.2. (0.08 MB XLS) [file pcbi.1000225.s002.xls]

## Sheet: notes
The codon-codon distances used in the text. Only codons that are >2 codons apart, have an association at q<=0.2, and can be mapped to at least one structure are shown.
See text for references and details on computing distances
All positions are HXB2-aligned to the start of p17 Gag.
Legend:
p17	p17 trimer crystal structure
p24	p14 NMR structure
p17p24	p17+p24 NMR structure
Inf	Indicates one or both positions could not be mapped to the structure

## Sheet: codon-codon distances
Codon1	Codon2	P17 trimer	P24	P17P24	MinDist
4	7	Inf	Inf	3.33325	3.33325
4	14	Inf	Inf	6.96146	6.96146
4	76	Inf	Inf	17.603	17.603
4	252	Inf	Inf	10.5982	10.5982
7	34	3.43296	Inf	1.99448	1.99448
7	78	10.8451	Inf	9.07145	9.07145
7	115	26.9106	Inf	23.5613	23.5613
7	130	Inf	Inf	28.1391	28.1391
7	243	Inf	Inf	24.45	24.45
9	7	4.1377	Inf	4.18929	4.1377
9	11	2.88539	Inf	2.42054	2.42054
9	15	6.49224	Inf	5.60102	5.60102
9	28	14.488	Inf	11.4489	11.4489
9	30	10.978	Inf	9.70925	9.70925
9	42	17.1051	Inf	16.5474	16.5474
9	43	20.8337	Inf	19.9871	19.9871
9	90	9.96238	Inf	8.68872	8.68872
9	93	10.6524	Inf	12.2631	10.6524
9	95	15.7871	Inf	14.1874	14.1874
9	121	36.4524	Inf	30.306	30.306
9	126	Inf	Inf	34.5006	34.5006
10	91	9.50358	Inf	4.9858	4.9858
11	4	Inf	Inf	4.42443	4.42443
11	7	9.38622	Inf	9.49263	9.38622
11	15	2.948	Inf	2.01755	2.01755
11	18	6.31126	Inf	4.46952	4.46952
11	34	10.0071	Inf	9.12235	9.12235
11	45	27.1051	Inf	26.5649	26.5649
11	75	23.6277	Inf	22.7742	22.7742
11	224	Inf	Inf	18.8691	18.8691
11	225	Inf	Inf	17.0021	17.0021
11	248	Inf	Inf	34.3678	34.3678
12	10	2.90035	Inf	3.24059	2.90035
12	20	10.8655	Inf	10.8783	10.8655
12	28	10.7822	Inf	10.0177	10.0177
12	34	7.11917	Inf	6.04926	6.04926
12	69	18.3205	Inf	23.5201	18.3205
12	78	15.5278	Inf	13.3275	13.3275
12	84	8.01527	Inf	6.45688	6.45688
12	93	6.44458	Inf	8.68307	6.44458
12	102	17.7919	Inf	15.8414	15.8414
12	132	Inf	Inf	24.8147	24.8147
12	280	Inf	Inf	41.2868	41.2868
14	30	8.33892	Inf	7.58897	7.58897
15	12	2.91204	Inf	2.30631	2.30631
15	28	6.92843	Inf	6.26137	6.26137
15	58	14.4552	Inf	14.4636	14.4552
15	65	21.396	Inf	19.4679	19.4679
15	74	20.5248	Inf	18.8853	18.8853
15	75	20.0302	Inf	18.672	18.672
15	76	17.6654	Inf	15.0533	15.0533
15	104	11.7551	Inf	8.82544	8.82544
15	110	16.8016	Inf	14.4425	14.4425
15	114	21.1305	Inf	17.3984	17.3984
15	177	Inf	Inf	37.168	37.168
15	226	Inf	Inf	21.4377	21.4377
15	280	Inf	Inf	33.4806	33.4806
16	127	Inf	Inf	26.109	26.109
16	269	Inf	Inf	38.9617	38.9617
18	4	Inf	Inf	10.3818	10.3818
18	28	2.69795	Inf	2.76304	2.69795
18	82	14.1739	Inf	12.4193	12.4193
20	18	3.55182	Inf	1.99049	1.99049
20	28	3.09646	Inf	1.79452	1.79452
20	49	21.9825	Inf	21.9359	21.9359
20	68	16.071	Inf	13.7648	13.7648
20	76	11.8543	Inf	7.72982	7.72982
20	95	3.17815	Inf	1.78903	1.78903
25	280	Inf	Inf	40.5162	40.5162
28	7	14.367	Inf	11.9733	11.9733
28	31	6.72481	Inf	6.00737	6.00737
28	34	9.16217	Inf	7.89083	7.89083
28	54	19.6886	Inf	18.1356	18.1356
28	91	16.6302	Inf	13.1717	13.1717
28	95	6.45895	Inf	5.32949	5.32949
28	182	Inf	Inf	27.035	27.035
28	186	Inf	Inf	34.1939	34.1939
28	280	Inf	Inf	40.5722	40.5722
30	7	9.19865	Inf	6.63982	6.63982
30	11	11.7883	Inf	10.791	10.791
30	28	2.98312	Inf	2.28099	2.28099
30	62	20.4898	Inf	18.7371	18.7371
30	76	14.394	Inf	12.7476	12.7476
30	94	11.914	Inf	11.3346	11.3346
30	113	32.1336	Inf	28.8836	28.8836
30	114	31.5451	Inf	27.4332	27.4332
30	119	37.7626	Inf	35.1107	35.1107
30	122	Inf	Inf	37.0838	37.0838
30	123	Inf	Inf	40.0836	40.0836
30	134	Inf	Inf	27.1828	27.1828
30	146	Inf	Inf	30.0611	30.0611
30	207	Inf	Inf	31.0826	31.0826
30	223	Inf	Inf	7.60499	7.60499
31	119	38.1796	Inf	33.6492	33.6492
31	128	Inf	Inf	34.7335	34.7335
34	15	9.00616	Inf	7.39651	7.39651
34	30	3.64973	Inf	2.26523	2.26523
34	38	2.45091	Inf	1.78689	1.78689
34	78	7.05637	Inf	5.86079	5.86079
35	30	6.02118	Inf	4.63363	4.63363
35	127	Inf	Inf	30.9788	30.9788
39	28	15.1931	Inf	14.4326	14.4326
39	35	2.9129	Inf	1.8068	1.8068
39	65	16.2259	Inf	15.3315	15.3315
42	119	32.1304	Inf	29.4406	29.4406
42	163	Inf	Inf	36.1998	36.1998
46	49	5.95434	Inf	5.35817	5.35817
46	60	4.08215	Inf	2.10517	2.10517
46	65	9.70204	Inf	9.64744	9.64744
46	66	9.00417	Inf	9.42487	9.00417
46	72	3.57256	Inf	12.5706	3.57256
46	75	6.22809	Inf	7.95704	6.22809
46	218	Inf	Inf	31.0731	31.0731
46	280	Inf	Inf	44.9731	44.9731
48	61	10.884	Inf	9.67195	9.67195
48	67	10.1654	Inf	13.3125	10.1654
48	76	8.07997	Inf	14.9385	8.07997
49	55	8.23743	Inf	5.73536	5.73536
49	76	8.67907	Inf	17.6509	8.67907
53	118	24.4354	Inf	18.8805	18.8805
54	12	6.36231	Inf	4.4609	4.4609
54	15	9.62497	Inf	10.3212	9.62497
54	68	15.3599	Inf	14.3565	14.3565
54	79	11.1176	Inf	10.869	10.869
54	109	13.8573	Inf	12.3382	12.3382
54	121	25.657	Inf	19.7092	19.7092
54	226	Inf	Inf	23.8353	23.8353
55	12	9.90924	Inf	7.98217	7.98217
55	61	6.71853	Inf	6.54368	6.54368
58	64	6.9247	Inf	5.62635	5.62635
58	76	13.5408	Inf	12.9935	12.9935
58	94	13.8059	Inf	12.6418	12.6418
58	109	9.96935	Inf	6.95133	6.95133
58	113	12.7964	Inf	6.34432	6.34432
58	119	14.4991	Inf	9.61304	9.61304
58	146	Inf	Inf	19.1152	19.1152
59	61	3.29754	Inf	3.55498	3.29754
60	43	10.774	Inf	7.95481	7.95481
61	15	13.9055	Inf	12.8245	12.8245
61	20	14.6015	Inf	12.7571	12.7571
61	28	17.1567	Inf	15.3592	15.3592
61	30	15.6807	Inf	14.0604	14.0604
61	53	8.46276	Inf	7.57043	7.57043
61	58	3.3288	Inf	2.84825	2.84825
61	69	9.74935	Inf	8.94056	8.94056
61	138	Inf	Inf	21.8314	21.8314
61	148	Inf	Inf	18.6597	18.6597
61	223	Inf	Inf	25.5252	25.5252
62	9	20.605	Inf	17.684	17.684
62	12	17.7958	Inf	14.3091	14.3091
62	18	23.3256	Inf	20.4385	20.4385
62	28	22.4508	Inf	21.1279	21.1279
62	54	8.7753	Inf	7.15817	7.15817
62	55	7.50747	Inf	6.42226	6.42226
62	58	3.0699	Inf	1.87344	1.87344
62	65	3.64959	Inf	2.81561	2.81561
62	74	13.744	Inf	14.4997	13.744
62	81	11.5967	Inf	10.4627	10.4627
62	82	7.3386	Inf	5.06636	5.06636
62	111	9.48777	Inf	8.04566	8.04566
62	115	13.091	Inf	10.3056	10.3056
62	119	17.6539	Inf	15.1041	15.1041
62	120	24.6769	Inf	18.0691	18.0691
62	243	Inf	Inf	22.522	22.522
62	250	Inf	Inf	28.905	28.905
62	252	Inf	Inf	30.9837	30.9837
64	62	3.26404	Inf	2.36957	2.36957
65	49	16.5044	Inf	16.0965	16.0965
65	52	16.5431	Inf	15.9147	15.9147
65	54	12.6038	Inf	12.0892	12.0892
65	72	10.1637	Inf	8.37473	8.37473
66	93	23.3479	Inf	21.8606	21.8606
67	11	29.1691	Inf	26.3411	26.3411
67	28	23.3116	Inf	21.2372	21.2372
67	69	3.28012	Inf	3.21335	3.21335
67	82	11.4996	Inf	7.69933	7.69933
67	122	Inf	Inf	23.6961	23.6961
67	127	Inf	Inf	16.6369	16.6369
67	280	Inf	Inf	41.5389	41.5389
68	94	15.5252	Inf	13.8176	13.8176
68	112	11.1045	Inf	10.4733	10.4733
69	7	15.5456	Inf	21.7615	15.5456
69	58	6.29849	Inf	12.8161	6.29849
69	62	8.68454	Inf	8.44789	8.44789
69	125	Inf	Inf	25.9165	25.9165
69	126	Inf	Inf	23.3219	23.3219
72	12	20.9804	Inf	22.6747	20.9804
72	31	18.7952	Inf	18.533	18.533
72	35	12.9497	Inf	14.7546	12.9497
72	42	4.64601	Inf	12.9856	4.64601
72	62	13.7884	Inf	13.1647	13.1647
72	67	4.89847	Inf	4.46993	4.46993
72	116	25.1041	Inf	24.6977	24.6977
72	176	Inf	Inf	31.9515	31.9515
75	62	9.95298	Inf	9.75555	9.75555
75	67	3.44345	Inf	2.50366	2.50366
75	88	16.7436	Inf	15.4176	15.4176
76	18	17.399	Inf	14.1887	14.1887
76	62	11.9844	Inf	11.3123	11.3123
76	72	2.9046	Inf	1.80144	1.80144
76	82	6.95169	Inf	5.8427	5.8427
76	176	Inf	Inf	25.8046	25.8046
78	28	13.6116	Inf	11.2199	11.2199
78	67	9.07417	Inf	6.03637	6.03637
78	252	Inf	Inf	23.1284	23.1284
79	55	11.5737	Inf	11.9922	11.5737
79	62	5.08424	Inf	4.71427	4.71427
79	65	3.60266	Inf	2.27811	2.27811
79	75	2.7609	Inf	2.19118	2.19118
81	55	12.4571	Inf	12.0721	12.0721
81	228	Inf	Inf	20.6492	20.6492
81	248	Inf	Inf	24.3874	24.3874
82	50	6.8294	Inf	5.50517	5.50517
82	51	3.84606	Inf	2.04751	2.04751
82	60	3.55806	Inf	1.99324	1.99324
83	228	Inf	Inf	27.0867	27.0867
84	38	12.3276	Inf	10.6348	10.6348
84	54	8.78199	Inf	7.12226	7.12226
84	81	3.17219	Inf	2.56747	2.56747
84	82	3.28041	Inf	3.09475	3.09475
84	86	2.92101	Inf	2.77328	2.77328
84	91	7.58749	Inf	6.08159	6.08159
84	127	Inf	Inf	22.3431	22.3431
85	34	4.01178	Inf	1.99493	1.99493
86	28	14.0957	Inf	13.5306	13.5306
86	66	14.6451	Inf	11.3716	11.3716
86	120	23.3887	Inf	17.4822	17.4822
86	215	Inf	Inf	29.4476	29.4476
90	12	5.46116	Inf	4.66037	4.66037
90	15	5.36525	Inf	4.93156	4.93156
90	54	2.95805	Inf	2.77253	2.77253
90	55	5.77464	Inf	5.87837	5.77464
90	58	6.84457	Inf	4.53292	4.53292
90	61	9.09747	Inf	7.04744	7.04744
90	62	12.7611	Inf	9.72998	9.72998
90	94	8.41795	Inf	6.32232	6.32232
90	95	12.2271	Inf	10.9855	10.9855
90	109	12.4725	Inf	8.31207	8.31207
90	112	12.3748	Inf	8.40691	8.40691
90	126	Inf	Inf	24.5563	24.5563
90	132	Inf	Inf	20.8479	20.8479
90	187	Inf	Inf	32.6922	32.6922
90	242	Inf	Inf	31.7727	31.7727
91	7	10.8464	Inf	9.71795	9.71795
91	11	8.06757	Inf	2.06975	2.06975
91	12	5.91548	Inf	2.62633	2.62633
91	15	3.35564	Inf	1.96332	1.96332
91	61	12.4561	Inf	10.6169	10.6169
91	82	10.6823	Inf	9.40628	9.40628
91	93	3.48877	Inf	3.2903	3.2903
91	104	10.0881	Inf	7.22075	7.22075
91	118	23.1443	Inf	18.7082	18.7082
91	121	27.8166	Inf	21.9376	21.9376
93	11	7.56589	Inf	9.09603	7.56589
93	15	3.20477	Inf	2.22071	2.22071
93	28	10.4534	Inf	12.0309	10.4534
93	49	18.4108	Inf	20.6265	18.4108
93	58	15.0098	Inf	14.7285	14.7285
93	61	13.5936	Inf	13.0966	13.0966
93	90	5.86369	Inf	5.74426	5.74426
93	136	Inf	Inf	23.7801	23.7801
94	7	14.075	Inf	12.5591	12.5591
95	12	11.2107	Inf	9.79166	9.79166
95	91	9.8207	Inf	9.23742	9.23742
95	93	3.00596	Inf	2.25069	2.25069
95	126	Inf	Inf	33.8509	33.8509
101	69	11.0104	Inf	9.78489	9.78489
102	67	15.9017	Inf	16.0229	15.9017
102	98	2.72922	Inf	1.94212	1.94212
104	61	3.76831	Inf	1.98945	1.98945
104	83	3.53953	Inf	1.98098	1.98098
104	94	7.09797	Inf	3.83956	3.83956
106	127	Inf	Inf	12.8464	12.8464
107	90	3.92696	Inf	2.03094	2.03094
107	91	7.91059	Inf	5.5852	5.5852
109	99	11.815	Inf	10.6941	10.6941
109	114	4.56962	Inf	3.99416	3.99416
111	4	Inf	Inf	21.7471	21.7471
111	61	10.9064	Inf	8.23452	8.23452
111	115	2.87503	Inf	1.79925	1.79925
112	7	22.6497	Inf	22.153	22.153
112	20	24.0749	Inf	22.5216	22.5216
112	26	31.6475	Inf	25.6872	25.6872
112	62	6.81703	Inf	5.40161	5.40161
112	91	17.775	Inf	14.9053	14.9053
112	109	3.11954	Inf	1.99774	1.99774
112	117	5.09465	Inf	3.49918	3.49918
112	119	7.50836	Inf	6.14474	6.14474
113	90	15.6978	Inf	10.3093	10.3093
113	106	7.66592	Inf	5.53548	5.53548
113	126	Inf	Inf	9.54881	9.54881
113	130	Inf	Inf	7.57268	7.57268
114	173	Inf	Inf	30.839	30.839
114	252	Inf	Inf	27.4452	27.4452
115	11	31.0393	Inf	25.8368	25.8368
115	12	26.2372	Inf	20.0005	20.0005
115	127	Inf	Inf	3.4281	3.4281
115	138	Inf	Inf	17.7835	17.7835
115	180	Inf	Inf	20.0578	20.0578
115	203	Inf	Inf	17.5132	17.5132
115	242	Inf	Inf	15.7645	15.7645
117	18	35.6983	Inf	28.1449	28.1449
117	147	Inf	Inf	16.5761	16.5761
117	242	Inf	Inf	14.4941	14.4941
117	243	Inf	Inf	13.9774	13.9774
117	260	Inf	Inf	27.3414	27.3414
118	31	38.8498	Inf	31.7676	31.7676
118	176	Inf	Inf	28.8536	28.8536
119	111	7.56184	Inf	7.60197	7.56184
119	128	Inf	Inf	2.97193	2.97193
119	286	Inf	Inf	39.1361	39.1361
120	128	Inf	Inf	5.94082	5.94082
121	35	42.1398	Inf	36.8296	36.8296
121	62	25.8114	Inf	20.0211	20.0211
121	102	24.3972	Inf	22.8875	22.8875
121	116	6.24169	Inf	4.05777	4.05777
121	126	Inf	Inf	4.40711	4.40711
121	128	Inf	Inf	4.11162	4.11162
121	182	Inf	Inf	15.3635	15.3635
121	186	Inf	Inf	21.4227	21.4227
121	219	Inf	Inf	31.3137	31.3137
122	15	Inf	Inf	29.9591	29.9591
122	28	Inf	Inf	39.4823	39.4823
122	62	Inf	Inf	18.7001	18.7001
122	93	Inf	Inf	26.9525	26.9525
122	125	Inf	Inf	1.99914	1.99914
122	138	Inf	Inf	19.104	19.104
122	143	Inf	Inf	15.4319	15.4319
123	11	Inf	Inf	33.9831	33.9831
123	75	Inf	Inf	31.3057	31.3057
123	119	Inf	Inf	1.63127	1.63127
123	120	Inf	Inf	2.50019	2.50019
123	121	Inf	Inf	2.60394	2.60394
123	163	Inf	Inf	32.563	32.563
123	223	Inf	Inf	23.26	23.26
123	228	Inf	Inf	19.2429	19.2429
124	7	Inf	Inf	30.3916	30.3916
124	91	Inf	Inf	23.6247	23.6247
124	121	Inf	Inf	2.64299	2.64299
124	128	Inf	Inf	5.92559	5.92559
125	118	Inf	Inf	6.15452	6.15452
125	121	Inf	Inf	2.20162	2.20162
126	34	Inf	Inf	34.6067	34.6067
126	55	Inf	Inf	18.4755	18.4755
126	62	Inf	Inf	18.1121	18.1121
126	112	Inf	Inf	9.5589	9.5589
126	118	Inf	Inf	6.93132	6.93132
126	119	Inf	Inf	3.49836	3.49836
126	243	Inf	Inf	24.2713	24.2713
127	26	Inf	Inf	34.1289	34.1289
127	95	Inf	Inf	27.501	27.501
127	107	Inf	Inf	11.706	11.706
127	138	Inf	Inf	18.2381	18.2381
128	224	Inf	Inf	25.0532	25.0532
132	136	Inf	Inf	4.92294	4.92294
136	260	Inf	9.60384	13.1017	9.60384
136	264	Inf	16.3453	15.4799	15.4799
136	286	Inf	Inf	41.0643	41.0643
138	84	Inf	Inf	22.0168	22.0168
138	91	Inf	Inf	26.9667	26.9667
138	104	Inf	Inf	21.0016	21.0016
138	143	Inf	3.26783	7.59258	3.26783
138	182	Inf	15.8715	10.8212	10.8212
138	223	Inf	23.2331	10.7872	10.7872
138	252	Inf	11.9129	6.85039	6.85039
138	280	Inf	43.0141	31.7024	31.7024
142	186	Inf	16.0256	14.1535	14.1535
143	228	Inf	11.2429	9.98665	9.98665
144	243	Inf	1.91604	1.99337	1.91604
146	62	Inf	Inf	18.5905	18.5905
146	126	Inf	Inf	22.5218	22.5218
146	168	Inf	17.2152	17.4534	17.2152
146	176	Inf	8.39529	8.18753	8.18753
146	268	Inf	19.1298	19.0288	19.0288
147	91	Inf	Inf	29.5211	29.5211
147	165	Inf	15.2247	15.8745	15.2247
147	243	Inf	7.11794	6.23661	6.23661
147	260	Inf	11.995	10.7287	10.7287
148	142	Inf	13.7583	10.7595	10.7595
148	146	Inf	4.01071	3.65917	3.65917
148	186	Inf	5.23941	4.78526	4.78526
148	219	Inf	31.5205	30.5312	30.5312
148	228	Inf	22.9766	19.4906	19.4906
148	252	Inf	21.9468	18.5388	18.5388
149	146	Inf	6.04647	6.34378	6.04647
159	125	Inf	Inf	24.4602	24.4602
159	242	Inf	22.4731	22.5235	22.4731
163	15	Inf	Inf	39.6317	39.6317
163	93	Inf	Inf	35.1199	35.1199
163	138	Inf	33.4533	18.6789	18.6789
163	147	Inf	14.459	12.2401	12.2401
163	165	Inf	2.57456	3.38655	2.57456
163	247	Inf	25.9784	21.9908	21.9908
163	267	Inf	10.1533	8.38665	8.38665
165	20	Inf	Inf	34.8751	34.8751
165	62	Inf	Inf	34.8918	34.8918
165	93	Inf	Inf	34.5285	34.5285
165	146	Inf	21.734	22.1219	21.734
168	163	Inf	2.90396	2.19131	2.19131
168	165	Inf	1.90434	1.93214	1.90434
173	49	Inf	Inf	43.0129	43.0129
173	119	Inf	Inf	30.9149	30.9149
173	121	Inf	Inf	30.5355	30.5355
173	138	Inf	21.5049	7.75287	7.75287
173	165	Inf	7.75834	8.13468	7.75834
173	215	Inf	17.1028	17.0806	17.0806
173	218	Inf	23.3395	21.9667	21.9667
173	252	Inf	19.2858	16.8617	16.8617
177	190	Inf	13.1481	12.063	12.063
182	9	Inf	Inf	36.3716	36.3716
182	113	Inf	Inf	12.9256	12.9256
182	143	Inf	8.4026	8.46228	8.4026
182	146	Inf	3.00011	3.18189	3.00011
182	168	Inf	15.5296	15.9918	15.5296
182	177	Inf	12.036	11.1467	11.1467
182	186	Inf	1.90842	1.83396	1.83396
182	242	Inf	4.61654	4.3245	4.3245
182	267	Inf	11.9106	12.6628	11.9106
186	61	Inf	Inf	19.2602	19.2602
186	64	Inf	Inf	18.9879	18.9879
186	138	Inf	19.77	10.0645	10.0645
186	147	Inf	1.99362	1.95731	1.95731
186	159	Inf	8.18272	7.49864	7.49864
186	165	Inf	14.7031	15.5627	14.7031
186	173	Inf	12.112	11.3532	11.3532
186	177	Inf	11.561	10.6266	10.6266
186	228	Inf	18.9382	15.963	15.963
186	256	Inf	16.4191	16.2123	16.2123
186	260	Inf	13.3345	12.2924	12.2924
186	263	Inf	9.93826	9.35805	9.35805
190	93	Inf	Inf	31.0611	31.0611
190	114	Inf	Inf	23.5301	23.5301
190	163	Inf	8.39999	7.01464	7.01464
190	186	Inf	1.78128	1.96082	1.78128
190	250	Inf	16.5794	15.586	15.586
190	256	Inf	21.6117	21.5661	21.5661
191	163	Inf	4.32314	3.08704	3.08704
200	138	Inf	34.626	23.6219	23.6219
203	69	Inf	Inf	27.1123	27.1123
203	268	Inf	6.60711	7.06166	6.60711
207	203	Inf	2.01312	1.79674	1.79674
207	256	Inf	13.7913	15.1124	13.7913
207	260	Inf	12.6755	12.6503	12.6503
211	146	Inf	25.5865	24.1002	24.1002
211	280	Inf	17.2452	22.4255	17.2452
212	16	Inf	Inf	23.7145	23.7145
212	288	Inf	Inf	14.8346	14.8346
215	95	Inf	Inf	11.0842	11.0842
215	112	Inf	Inf	19.5976	19.5976
215	119	Inf	Inf	25.6839	25.6839
215	120	Inf	Inf	24.6683	24.6683
215	138	Inf	30.0915	22.0184	22.0184
215	200	Inf	15.542	15.45	15.45
215	207	Inf	6.39372	6.47972	6.39372
215	218	Inf	5.29318	5.67583	5.29318
215	250	Inf	14.2504	15.0031	14.2504
215	260	Inf	11.3356	11.2901	11.2901
215	268	Inf	8.01286	7.59543	7.59543
218	91	Inf	Inf	23.0446	23.0446
218	223	Inf	3.29946	4.01288	3.29946
219	75	Inf	Inf	32.718	32.718
219	126	Inf	Inf	21.5154	21.5154
219	159	Inf	30.9739	33.142	30.9739
219	215	Inf	5.02985	5.96331	5.02985
219	248	Inf	15.8186	13.6313	13.6313
219	252	Inf	10.7314	9.14428	9.14428
223	15	Inf	Inf	20.0726	20.0726
223	28	Inf	Inf	15.8171	15.8171
223	109	Inf	Inf	25.8695	25.8695
223	119	Inf	Inf	25.9561	25.9561
223	219	Inf	3.92261	3.46863	3.46863
223	228	Inf	2.06052	1.99125	1.99125
223	242	Inf	8.1962	6.35762	6.35762
223	256	Inf	7.03037	6.33588	6.33588
224	66	Inf	Inf	29.3761	29.3761
224	83	Inf	Inf	22.4443	22.4443
225	223	Inf	3.48875	3.46791	3.46791
228	79	Inf	Inf	25.241	25.241
228	116	Inf	Inf	18.6151	18.6151
228	219	Inf	8.93032	8.3339	8.3339
228	232	Inf	6.00544	4.1679	4.1679
228	248	Inf	2.38796	3.4869	2.38796
228	260	Inf	12.4602	9.60861	9.60861
230	219	Inf	3.78175	2.00719	2.00719
230	223	Inf	1.99715	2.05624	1.99715
242	146	Inf	11.1414	9.74329	9.74329
242	211	Inf	18.4751	18.1812	18.1812
242	248	Inf	5.73326	5.59094	5.59094
242	252	Inf	9.60123	9.24243	9.24243
243	163	Inf	24.022	20.9088	20.9088
244	62	Inf	Inf	22.833	22.833
247	11	Inf	Inf	36.7669	36.7669
247	58	Inf	Inf	25.14	25.14
247	256	Inf	6.27037	6.22359	6.22359
248	46	Inf	Inf	21.3572	21.3572
248	95	Inf	Inf	23.0589	23.0589
248	116	Inf	Inf	15.699	15.699
248	218	Inf	12.8775	14.9842	12.8775
248	223	Inf	8.9342	9.50486	8.9342
248	252	Inf	2.1803	2.13781	2.13781
248	256	Inf	4.39718	4.86152	4.39718
250	242	Inf	7.56228	5.96504	5.96504
250	252	Inf	2.42804	2.53962	2.42804
250	260	Inf	3.33315	3.46205	3.33315
252	65	Inf	Inf	23.8121	23.8121
252	118	Inf	Inf	25.4993	25.4993
252	147	Inf	19.3235	16.5038	16.5038
252	168	Inf	26.8226	24.591	24.591
252	215	Inf	14.8794	15.7211	14.8794
252	228	Inf	1.9843	2.15549	1.9843
252	247	Inf	4.43032	4.4231	4.4231
252	255	Inf	2.18277	2.18276	2.18276
253	62	Inf	Inf	26.9989	26.9989
253	228	Inf	5.04299	4.84005	4.84005
256	120	Inf	Inf	23.8639	23.8639
256	146	Inf	14.7877	13.0722	13.0722
256	173	Inf	14.3078	13.4897	13.4897
256	182	Inf	11.5594	10.635	10.635
256	215	Inf	9.78281	9.25983	9.25983
256	226	Inf	10.707	8.16138	8.16138
256	228	Inf	3.09624	3.90853	3.09624
256	252	Inf	2.17997	2.26293	2.17997
260	168	Inf	13.5957	12.7685	12.7685
260	182	Inf	10.124	8.59496	8.59496
260	211	Inf	11.2169	11.0222	11.0222
260	264	Inf	1.99566	1.79365	1.79365
260	268	Inf	7.42226	7.16303	7.16303
264	173	Inf	2.938	4.73437	2.938
264	215	Inf	5.71315	6.92212	5.71315
264	268	Inf	1.83067	1.8776	1.83067
267	55	Inf	Inf	42.1838	42.1838
267	173	Inf	1.95601	1.99813	1.95601
267	264	Inf	1.96769	2.33029	1.96769
269	212	Inf	9.99743	11.0962	9.99743
273	268	Inf	4.26638	4.59178	4.26638
275	234	Inf	18.8386	20.2959	18.8386
275	273	Inf	2.52924	3.05662	2.52924
280	115	Inf	Inf	38.7315	38.7315
280	126	Inf	Inf	40.2022	40.2022
280	148	Inf	26.9699	30.2276	26.9699
280	159	Inf	11.7319	16.3462	11.7319
280	219	Inf	34.184	36.2243	34.184
286	53	Inf	Inf	44.0346	44.0346
286	147	Inf	Inf	32.1171	32.1171
288	229	Inf	Inf	25.6745	25.6745
